# Supplementary material for: Superior electrocatalytic hydrogen evolution activity of a triply bridged diruthenium(ii) complex on a carbon cloth support
Source: Royal Society of Chemistry journal article supplement (doi:10.1039/d4cc01173b), 2024-01-01
Supplement: d4cc01173b1.pdf [file d4cc01173b1.pdf]

## **Electronic Supplementary Information**

### **Superior electrocatalytic hydrogen evolution activity of a triply bridged diruthenium(II) complex on carbon cloth support**

Yogita Arya,<sup>a</sup> Toufik Ansari,<sup>b</sup> Sudip Kumar Bera,<sup>a</sup> Sanjib Panda,<sup>a</sup> Arindam Indra,<sup>\*b</sup> and Goutam Kumar Lahiri<sup>\*a</sup>

<sup>a</sup>*Department of Chemistry, Indian Institute of Technology Bombay, Powai, Mumbai-400076, India. Email: [lahiri@chem.iitb.ac.in](mailto:lahiri@chem.iitb.ac.in)*

<sup>b</sup>*Department of Chemistry, Indian Institute of Technology BHU, Varanasi- 221005, India. Email: [arindam.chy@iitbhu.ac.in](mailto:arindam.chy@iitbhu.ac.in)*

## Experimental Section

### Materials

The precursor complex  $[\text{Ru}^{\text{II}}(\text{PPh}_3)_3(\text{CO})(\text{H})(\text{Cl})]$ <sup>1</sup> and free ligands L1/L2/L3<sup>2</sup> were prepared according to the reported literature procedures. Other chemicals and solvents were of reagent grade and used as received. For spectroscopic and electrochemical studies HPLC-grade solvents were used.

### Physical measurements

Electrospray mass spectrometry (ESI-MS) was performed on Bruker's Maxis Impact (282001.00081) instrument. <sup>1</sup>H NMR were recorded on a Bruker Avance III 400 MHz spectrometer.

Cyclic and differential pulse voltammetric measurements were done using a PAR model 273A electrochemistry system. A glassy carbon working electrode, platinum wire auxiliary electrode and a saturated calomel reference electrode (SCE) were used in a standard three-electrode configuration with  $\text{Et}_4\text{NClO}_4$  (TEAP) as the supporting electrolyte (substrate concentration  $\approx 10^{-3}$  M; standard scan rate 100 mV s<sup>-1</sup>). The half-wave potential  $E^0$  was set equal to  $0.5(E_{\text{pa}}+E_{\text{pc}})$ , where  $E_{\text{pa}}$  and  $E_{\text{pc}}$  are anodic and cathodic cyclic voltammetry peak potentials, respectively. A platinum wire gauze electrode was used for the constant potential coulometry experiment. Electrochemical hydrogen evolution activities and kinetic studies were performed using Metrohm Autolab (BCA80276).

UV-vis-NIR spectra were performed on a PerkinElmer Lambda 1050 spectrophotometer. The electrical conductivity was checked using an autoranging conductivity meter (Toshcon Industries, India). Infrared spectra were recorded on a PerkinElmer Spectrum One IR spectrophotometer with samples prepared as KBr pellets. The elemental analyses were performed on a Vario MICRO CUBE Elementar.

## Preparation of complexes

**Syntheses of  $[(\text{PPh}_3)(\text{CO})\text{Ru}^{\text{II}}(\mu\text{-H})(\mu\text{-L1})(\mu\text{-Cl})\text{Ru}^{\text{II}}(\text{CO})(\text{PPh}_3)](\text{ClO}_4)_2$  (**[1]**)( $\text{ClO}_4$ )<sub>2</sub>,  $[(\text{PPh}_3)_2(\text{CO})(\text{H})\text{Ru}^{\text{II}}(\text{L2}')]$  (**[2]**)( $\text{ClO}_4$ ) and  $[(\text{PPh}_3)_2(\text{CO})(\text{H})\text{Ru}^{\text{II}}(\text{L3}')]$  (**[3]**)( $\text{ClO}_4$ ).**

Complexes **[1]**( $\text{ClO}_4$ )<sub>2</sub>, **[2]** $\text{ClO}_4$  and **[3]** $\text{ClO}_4$  were obtained from the reactions of metal precursor  $[\text{Ru}^{\text{II}}(\text{PPh}_3)_3(\text{CO})(\text{H})(\text{Cl})]$  (100 mg, 0.10 mmol) and the ligand L1 (20 mg, 0.05 mmol), L2 (32 mg, 0.05 mmol) and L3 (37 mg, 0.05 mmol), respectively, in refluxing EtOH for 12 h under a dinitrogen atmosphere. The residue thus obtained in each case on removing the solvent under reduced pressure was moistened with a few drops of  $\text{CH}_3\text{CN}$ . A saturated aqueous solution of  $\text{NaClO}_4$  was then added into it, and the solution was allowed to cool overnight at 273 K. The precipitate was filtered off, washed with chilled water to remove excess  $\text{NaClO}_4$  and dried under vacuum over  $\text{P}_4\text{O}_{10}$ . The product was purified on a neutral alumina column with a  $\text{CH}_2\text{Cl}_2/\text{CH}_3\text{CN}$  (3:2) mixture as an eluant. The pure complexes were obtained on removal of solvent under reduced pressure.

**[1]**( $\text{ClO}_4$ )<sub>2</sub>: Yield: 52 mg (70%). MS (ESI+,  $\text{CH}_3\text{CN}$ ):  $m/z$  calcd for  $\{([\text{1}](\text{ClO}_4)_2)\text{-ClO}_4\}^+$ : 1307.08; found: 1307.06.  $^1\text{H}$  NMR (400 MHz,  $(\text{CD}_3)_2\text{SO}$ ):  $\delta$  = 9.33 (d,  $J$  = 7.3 Hz, 1H), 9.26 (d,  $J$  = 5.7 Hz, 1H), 8.95 (m, 2H), 8.66 (d,  $J$  = 8.3 Hz, 1H), 8.21 (d,  $J$  = 7.9 Hz, 2H), 8.04 (t,  $J$  = 8.2 Hz, 2H), 7.68 (t,  $J$  = 8.0 Hz, 1H), 7.54 (m, 3H), 7.42 (t,  $J$  = 8.1 Hz, 3H), 7.24 (m, 18H), 6.94 (m, 12H), -16.19 (dd,  $J$  = 20 Hz, 1H) ( $^2J_{\text{P-H}}/\text{Hz}$ : 20) ppm.  $^{31}\text{P}$  NMR (162 MHz,  $\text{CDCl}_3$ ):  $\delta$  = 59, 40 ppm. Molar conductivity ( $\text{CH}_3\text{CN}$ ):  $\Lambda_{\text{M}} = 202 \text{ } \Omega^{-1} \text{ cm}^2 \text{ M}^{-1}$ . Anal. Calcd for  $\text{C}_{62}\text{H}_{47}\text{Cl}_2\text{N}_6\text{O}_{10}\text{P}_2\text{Ru}_2$ : C, 54.50; H, 3.46; N, 6.13; found: C, 54.56; H, 3.81; N, 6.11. IR (KBr,  $\text{cm}^{-1}$ ): 1985 [ $\nu(\text{C}\equiv\text{O})$ ], 1091 [ $\nu(\text{ClO}_4^-)$ ] and 1632 [ $\nu(\text{Ru-H-Ru})$ ].

**[2]** $\text{ClO}_4$ : Yield: 65 mg (57%). MS (ESI+,  $\text{CH}_3\text{CN}$ ):  $m/z$  calcd for  $\{([\text{2}]\text{ClO}_4)\text{-ClO}_4\}^+$ : 997.23; found: 997.21.  $^1\text{H}$  NMR (400 MHz,  $\text{CDCl}_3$ ):  $\delta$  = 9.74 (d,  $J$  = 8.0 Hz, 1H), 8.70 (d,  $J$  = 8.7 Hz, 1H), 7.96 (t,  $J$  = 7.8 Hz, 1H), 7.80 (m, 2H), 7.68 (m, 2H), 7.39 (m, 18H), 7.26 (m, 12H), 7.04 (d,  $J$  = 7.8 Hz, 1H), 6.96 (d,  $J$  = 7.9, 1H), 2.66 (s, 3H), 2.42 (s, 3H), 2.17 (s, 3H), -

14.06 (t, 1H) ( $^2J_{\text{P-H}}/Hz$ : 36) ppm.  $^{31}\text{P}$  NMR (162 MHz,  $\text{CDCl}_3$ ):  $\delta = 44.16$  ppm. Molar conductivity ( $\text{CH}_3\text{CN}$ ):  $\Lambda_{\text{M}} = 98 \Omega^{-1} \text{ cm}^2 \text{ M}^{-1}$ . Anal. Calcd for  $\text{C}_{58}\text{H}_{49}\text{ClN}_4\text{O}_6\text{P}_2\text{Ru}$ : C, 63.53; H, 4.50; N, 5.11; found: C, 63.27; H, 4.34; N, 5.27. IR (KBr,  $\text{cm}^{-1}$ ): 1935 [ $\nu(\text{C}\equiv\text{O})$ ], 1093 [ $\nu(\text{ClO}_4^-)$ ].

**[3]ClO<sub>4</sub>**: Yield: 81 mg (60%). MS (ESI+,  $\text{CH}_3\text{CN}$ ),  $m/z$  calcd for  $\{([\text{3}]\text{ClO}_4)\text{-ClO}_4\}^+$ : 1192.91; found: 1192.14.  $^1\text{H}$  NMR (400 MHz,  $\text{CDCl}_3$ ):  $\delta = 7.95$  (d,  $J = 8.6$  Hz, 2H), 7.47 (t,  $J = 8.2$  Hz 3H), 7.32 (m, 4H), 7.17 (m, 18H), 7.02 (m, 12H), 6.31 (d,  $J = 7.7$  Hz, 1H), -12.03 (t, 1H) ( $^2J_{\text{P-H}}/Hz$ : 36) ppm.  $^{31}\text{P}$  NMR (202 MHz,  $\text{CDCl}_3$ ):  $\delta = 42.05$  ppm. Molar conductivity ( $\text{CH}_3\text{CN}$ ):  $\Lambda_{\text{M}} = 102 \Omega^{-1} \text{ cm}^2 \text{ M}^{-1}$ . Anal. Calcd for  $\text{C}_{55}\text{H}_{40}\text{ClBr}_3\text{N}_4\text{O}_6\text{P}_2\text{Ru}$ : C, 51.16; H, 3.12; N, 4.34; found: C, 51.34; H, 3.34; N, 4.47. IR (KBr,  $\text{cm}^{-1}$ ): 1937 [ $\nu(\text{C}\equiv\text{O})$ ], 1090 [ $\nu(\text{ClO}_4^-)$ ].

**Caution!** Perchlorate salts are potentially explosive and should be handled with care.

### Preparation of the working anode

3 mg catalyst was dissolved in 60  $\mu\text{L}$  dichloromethane and the solution was drop casted on 1 x 1  $\text{cm}^2$  area of CC (carbon cloth) by a micropipette (3 x 20  $\mu\text{L}$ ) and dried for 1 h in an air oven at 60°C.

### Electrochemical experiments

The electrochemical studies were carried out in a single-compartment three-electrode setup immersed in aqueous phosphate buffer solution with different pH values (pH = 3, 7 and 12). The working electrode was carbon cloth supported catalyst, while platinum wire and Ag/AgCl were used as counter and reference electrodes, respectively. The linear sweep voltammetry (LSV) was presented with 60%  $iR$  correction. The following equation was used to reference each potential against the reversible hydrogen electrode:

$$E_{\text{RHE}} = E_{\text{Ag/AgCl}} + 0.197 + 0.059 \text{ pH}$$

The EIS spectra were collected with an anodic polarisation potential of 1.45 V *versus* RHE.

The frequency range of measurement were 0.01 to 106 Hz.

### **Photoelectrochemical measurements**

Photoelectrochemical studies were conducted using fluorine-doped tin oxide (FTO) as the conducting support. Initially, 1 mg of [1](ClO<sub>4</sub>)<sub>2</sub> was dissolved in dichloromethane (DCM) and deposited on FTO by drop-casting. Here also, single-compartment three-electrode setup immersed in a phosphate buffer solution was used. LED light (X001O8ZOBF) was used as the illumination source for the photoelectrochemical measurements.

### **Optimization of the catalyst loading**

The amount of catalyst loading was optimized for [1](ClO<sub>4</sub>)<sub>2</sub> and same amount was loaded for [2]ClO<sub>4</sub>/[3]ClO<sub>4</sub> irrespective of their molecular weight. The loading of [1](ClO<sub>4</sub>)<sub>2</sub> on carbon cloth was optimized based on two factors:

(i) High HER activity and (ii) the limit of catalyst loading on 1 x1 cm<sup>2</sup> area of carbon cloth. With increasing amount of catalyst loading (1-4 mg) on CC, HER activity increased up to 3 mg of loading. No improvement of activity was observed on excess loading, In addition, higher loading crossed the limit of carbon cloth to hold the catalyst on it, causing leaching and inhomogeneous distribution of the catalyst onto the support.

### **Loading and characterisation of the catalysts**

The loading of catalyst was 3 mg cm<sup>-2</sup>. The weight difference of the carbon cloth before and after the catalyst loading ensured the loading of the catalyst on the support. The error was estimated to be in the range of 3±0.1 mg. Further, retention of the molecular entity of the complex on the carbon cloth support was identified by PXRD as well as by the unaltered UV-vis spectrum of the redissolved catalyst. The homogeneous distribution of the catalyst on carbon cloth support was ascertained by SEM experiment.

### **Recovery of the catalyst**

Catalyst was successfully recovered after the catalytic process. To recover the catalyst, carbon cloth with deposited catalyst was immersed in dichloromethane to make it soluble.

Subsequently, UV-visible spectrum of the recovered catalyst was recorded.

After the HER process, catalyst@carbon cloth was washed with water, dried in oven (60 °C for 12 h), and measured the weight. 10% decrease in weight of the catalyst@carbon cloth was observed. Additionally, UV-vis spectrum showed 88% retention of the catalyst on the support after HER process.

### **Crystal structure determination**

Single crystals were obtained by slow evaporation of a 1:1 CHCl<sub>3</sub>:C<sub>6</sub>H<sub>6</sub> solution of L3 and [1](ClO<sub>4</sub>)<sub>2</sub>, 1:1 CHCl<sub>3</sub>:Toluene solution of [2]ClO<sub>4</sub> and 1:1 CHCl<sub>3</sub>:C<sub>6</sub>H<sub>6</sub> solution of [3]ClO<sub>4</sub>. X-ray diffraction data were collected using a Bruker D8 QUEST single crystal diffractometer using Mo-K $\alpha$  radiation at 150(2) K. The data collection was evaluated using the CrystalClear-SM Expert software. The data were collected by the standard  $\omega$ -scan technique. The structure was solved by direct methods using SHELXL-2018 and refined by full matrix least-squares with SHELXL-2018, refining on  $F^2$ .<sup>3</sup> All data were corrected for Lorentz and polarisation effects and all non-hydrogen atoms were refined anisotropically. The remaining hydrogen atoms were placed in geometrically constrained positions and refined with isotropic temperature factors, generally 1.2U<sub>eq</sub> of their parent atoms. Hydrogen atoms were included in the refinement process as per the riding model. CCDC nos. 2323104, 2311897, 2311898, 2311899 contain the supplementary crystallographic data for L3, [1](ClO<sub>4</sub>)<sub>2</sub>, [2]ClO<sub>4</sub> and [3]ClO<sub>4</sub> respectively. These data can be obtained free of charge from the Cambridge crystallographic data centre via [www.ccdc.cam.ac.uk/data\\_request/cif](http://www.ccdc.cam.ac.uk/data_request/cif).

### **Computational details**

Full geometry optimisations were carried out using the density functional theory method at (U)B3LYP/LanL2DZ/6-31G\* level for **1**<sup>n</sup> ( $n = +3, 1, 0$ ), **2**<sup>n</sup> ( $n = +2, 0$ ), **3**<sup>n</sup> ( $n = +2, 0, -1$ ) and (R)B3LYP for **1**<sup>n</sup> (+2), **2**<sup>n</sup>/**6**<sup>n</sup> ( $n = +1$ ).<sup>4</sup> All elements except ruthenium was assigned the 6-31G\* basis set. The LanL2DZ basis set with effective core potential was employed for the

ruthenium atom.<sup>5</sup> Vertical electronic excitations based on (B3LYP/LanL2DZ/6-31G\*) optimized geometries were computed using the time-dependent density functional theory (TD-DFT) formalism<sup>6</sup> in acetonitrile using the conductor-like polarizable continuum model (CPCM).<sup>7</sup> Electronic spectra were calculated using the SWizard program.<sup>8</sup> Chemissian 1.7<sup>9</sup> was used to calculate the fractional contributions of various groups to each molecular orbital. All calculated structures were visualized with ChemCraft.<sup>10</sup>

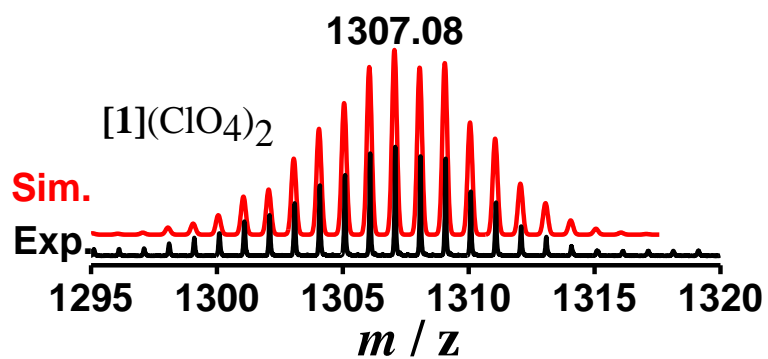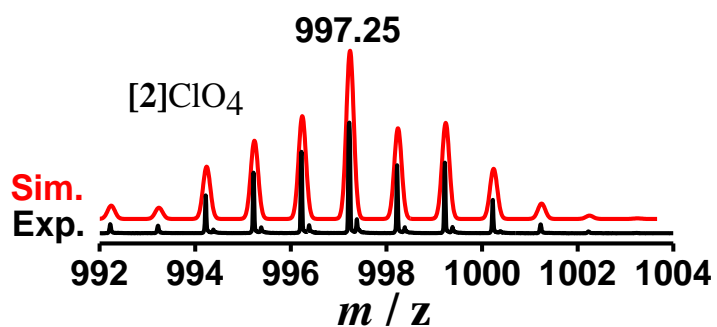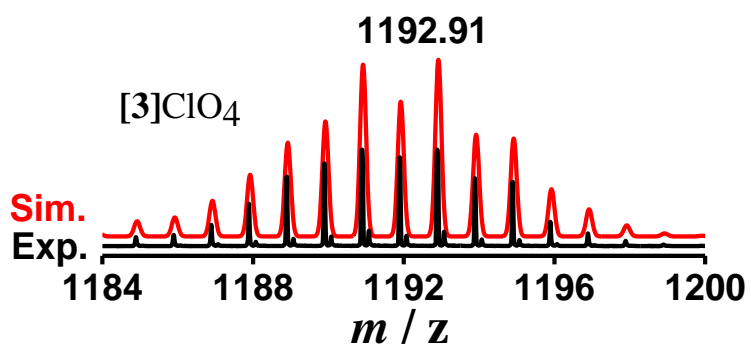

Fig. S1 Mass spectra of the complexes.



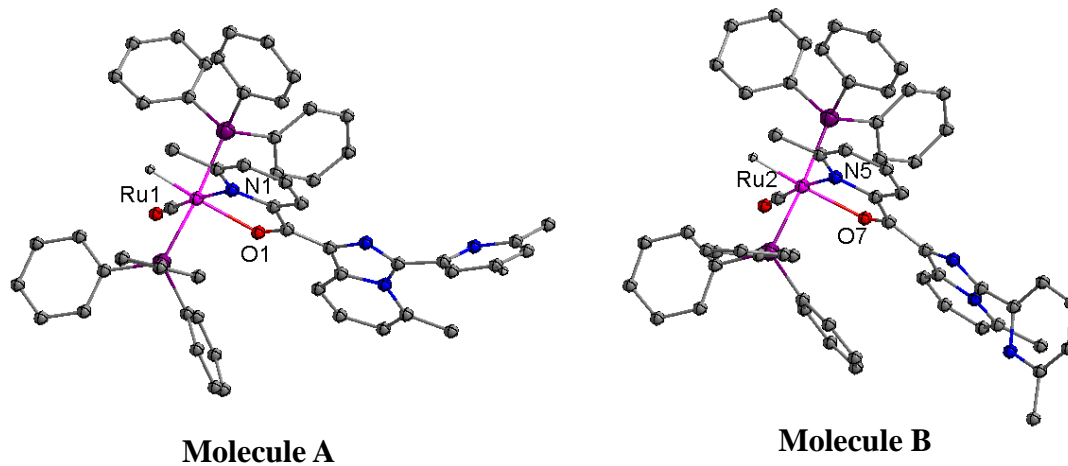

**Fig. S2** Perspective views of the cationic part of  $[2]ClO_4$ . Ellipsoids are drawn at 30% probability level. Hydrogen atoms except Ru-H and  $ClO_4^-$  are omitted for clarity.

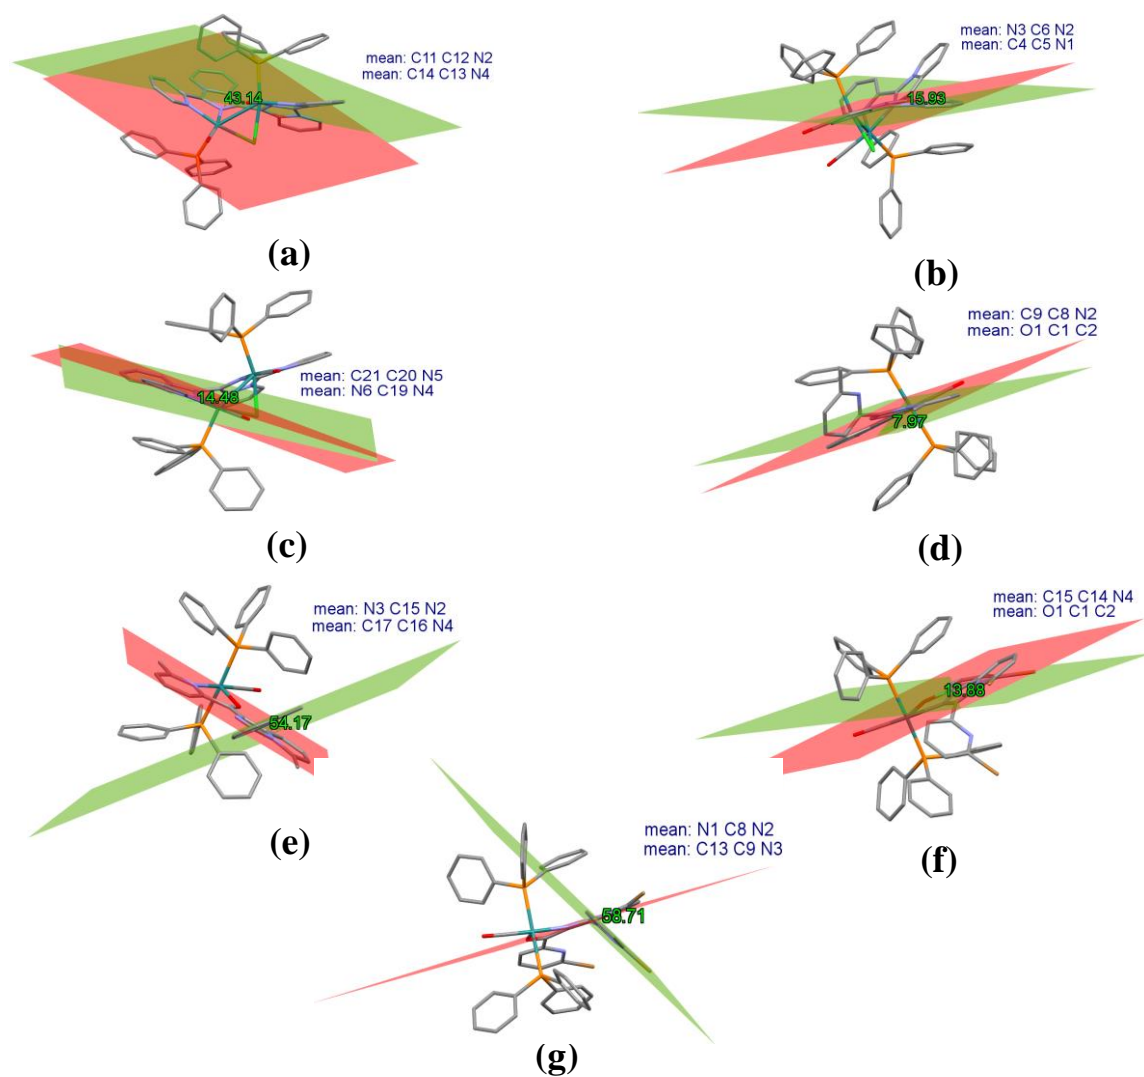

**Fig. S3** Torsional angles (deg) between the planes for (a)/(b)/(c) for  $[1](\text{ClO}_4)_2$ , (d)/(e)  $[2]\text{ClO}_4$  and (f)/(g) for  $[3]\text{ClO}_4$ .

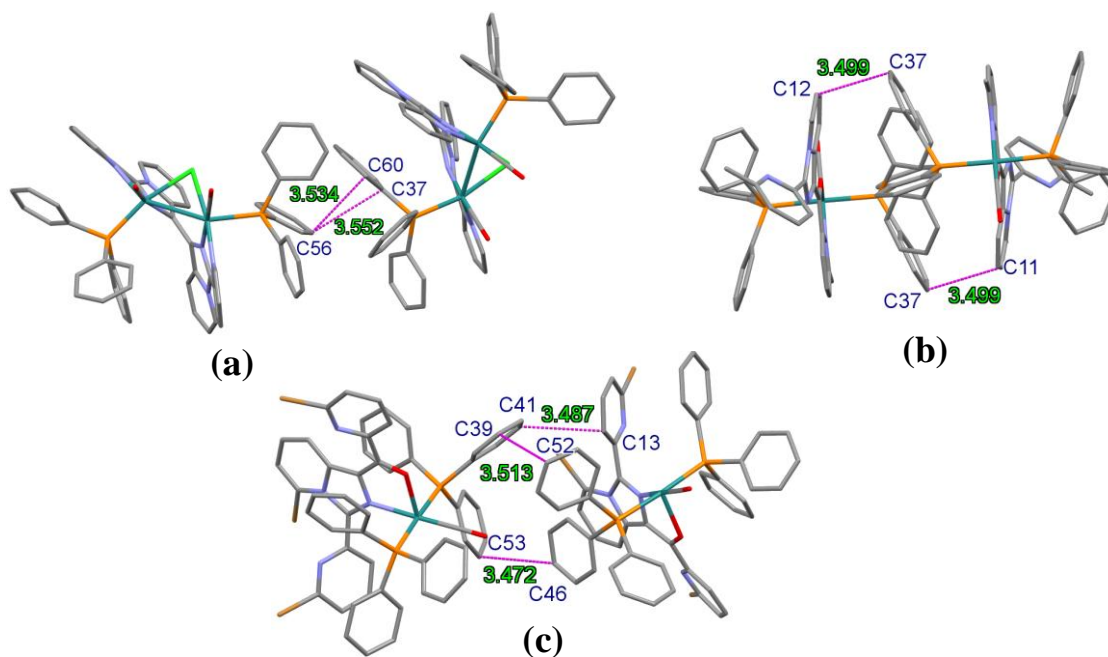

**Fig. S4a**  $\pi$ --- $\pi$  interactions between the neighbouring molecules for (a)  $[1](\text{ClO}_4)_2$ , (b)  $[2]\text{ClO}_4$  and (c)  $[3]\text{ClO}_4$ .

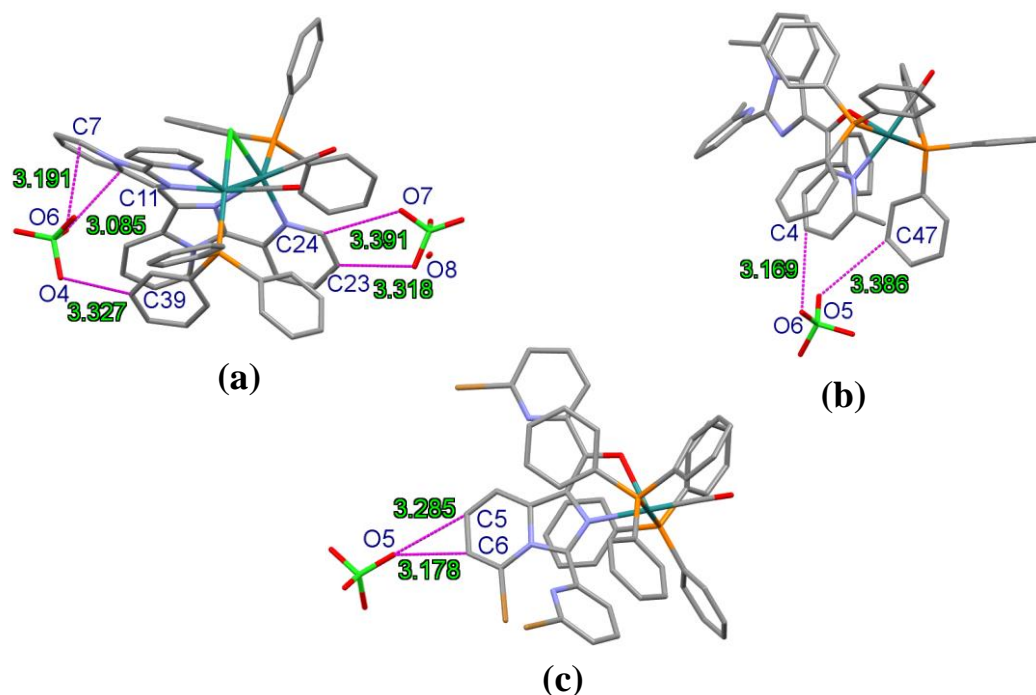

**Fig. S4b** C-H---O hydrogen bonding interactions between the neighbouring molecules of (a)  $[1](\text{ClO}_4)_2$ , (b)  $[2]\text{ClO}_4$  and (c)  $[3]\text{ClO}_4$ .

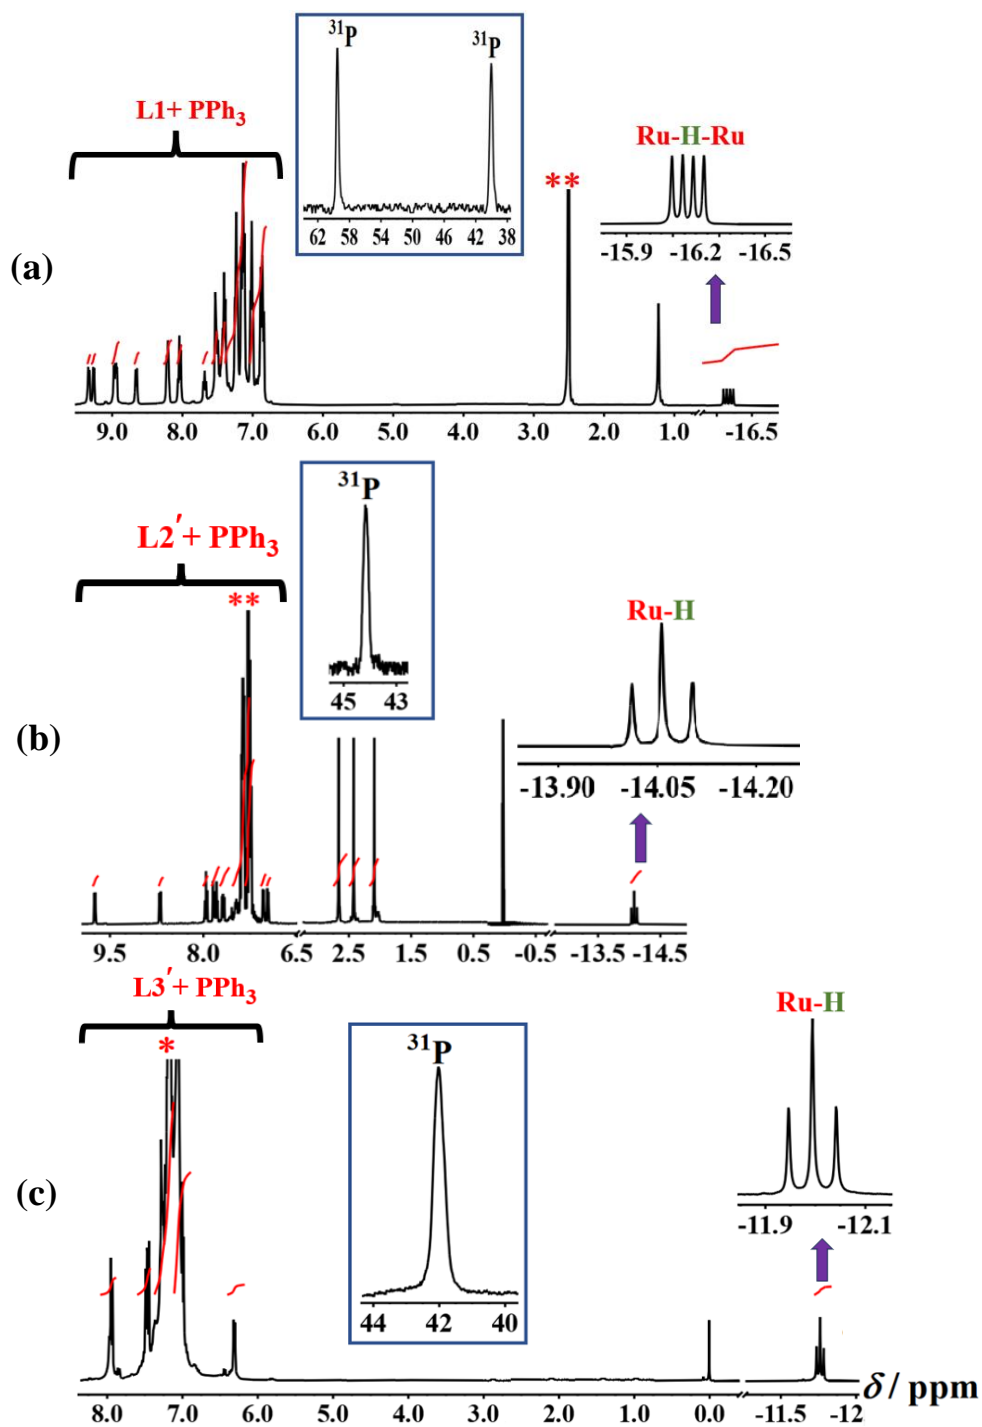

**Fig. S5**  $^1\text{H}$  NMR spectra of (a)  $[\mathbf{1}](\text{ClO}_4)_2$ , (b)  $[\mathbf{2}]\text{ClO}_4$  and (c)  $[\mathbf{3}]\text{ClO}_4$  in  $(\text{CD}_3)_2\text{SO}$  (\*\*) and  $\text{CDCl}_3$  (\*), respectively, with TMS ( $\delta = 0$  ppm) as an internal standard. Inset shows segmented  $^{31}\text{P}$  NMR signature of complexes.

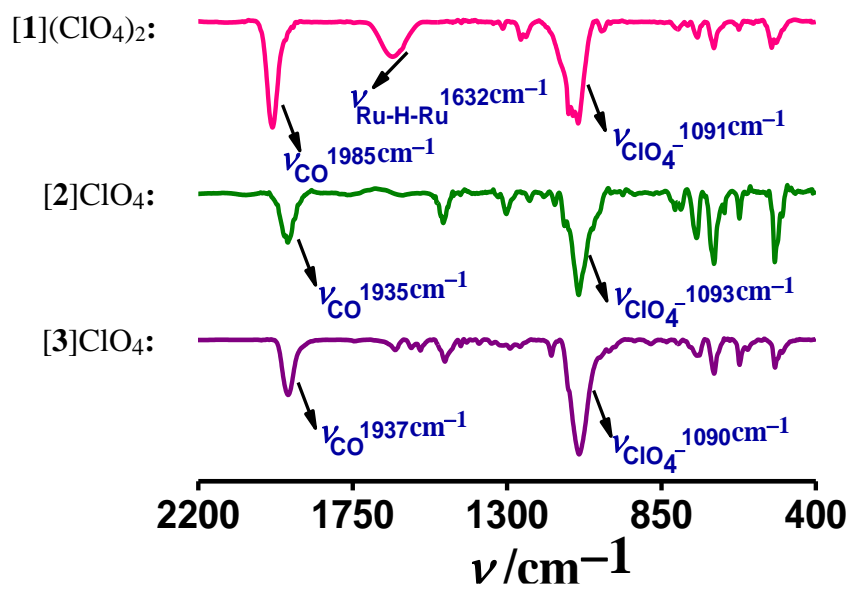

**Fig. S6** IR spectra as KBr disc.

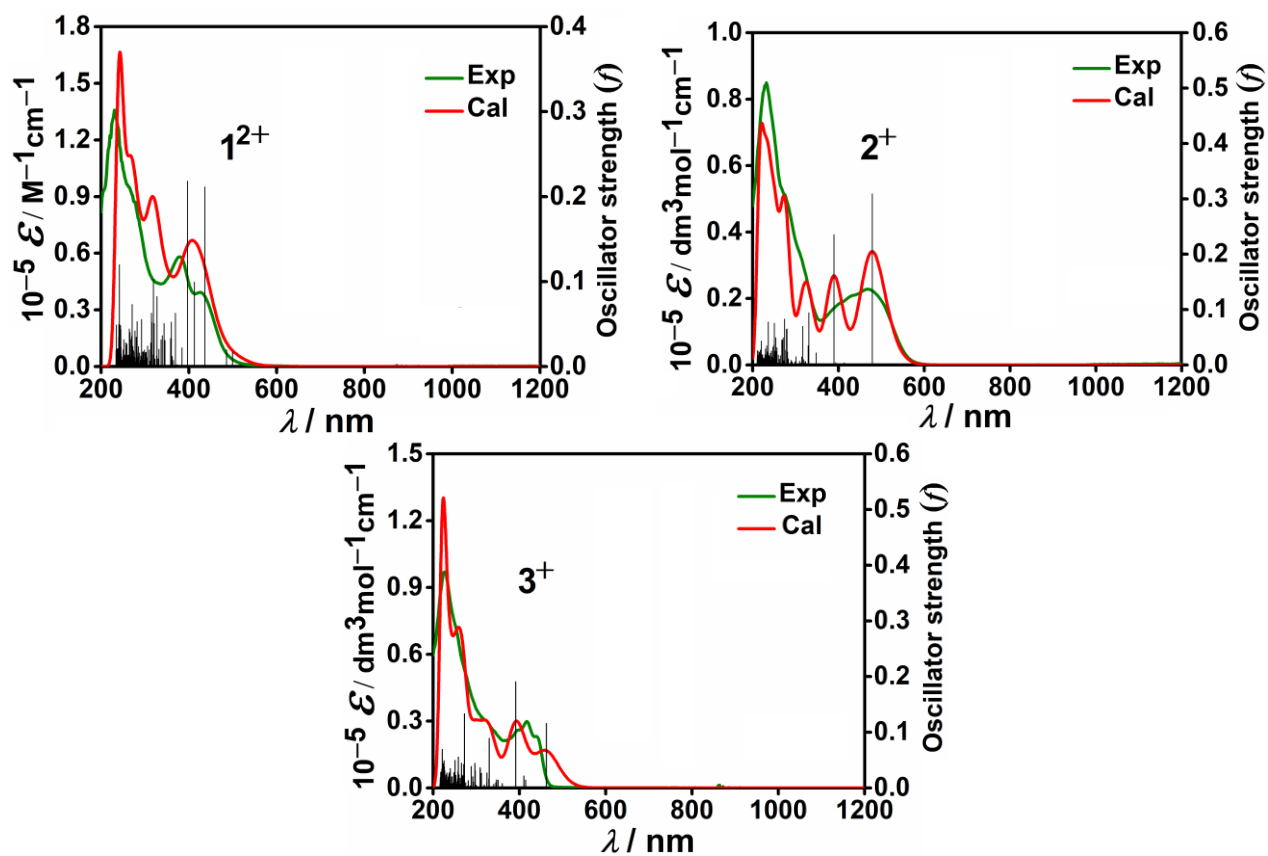

**Fig. S7** Experimental and TD-DFT (B3LYP/(CPCM)/LanL2DZ/6-31G\*) calculated electronic spectra in  $\text{CH}_3\text{CN}$ . Oscillator strengths are shown by black vertical lines; the spectra (red) are convoluted with a Gaussian function having fullwidth at half-maximum of  $3000 \text{ cm}^{-1}$ .

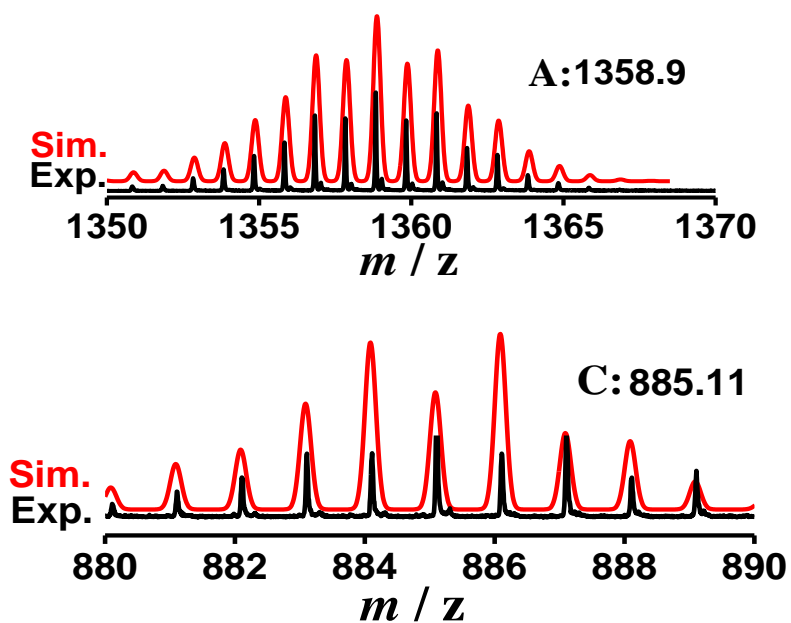

Fig. S8a Mass spectrometry of (a) A and (b) D.

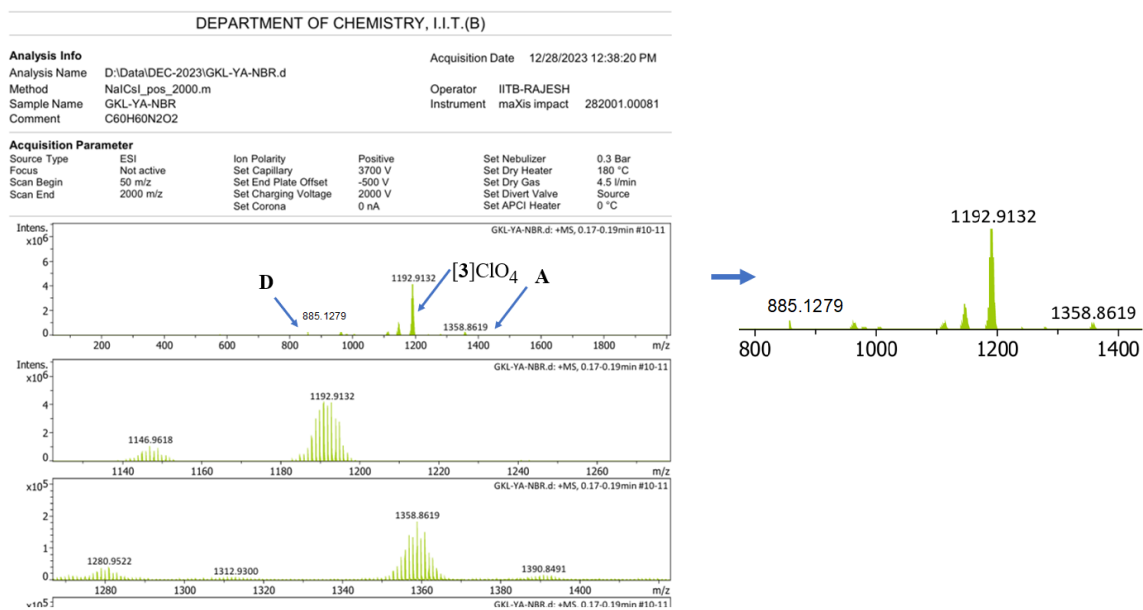

Fig. S8b Mass spectrum of crude [3]ClO<sub>4</sub>.

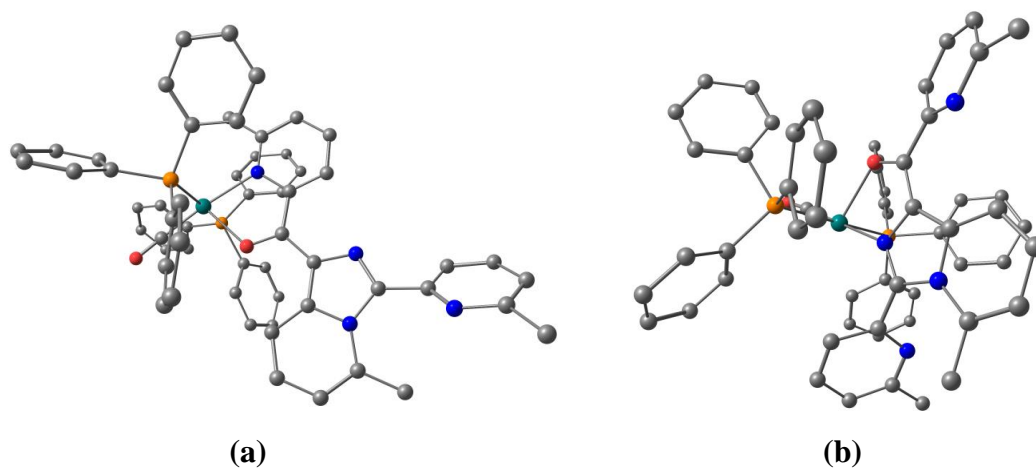

**Fig. S9a** (a) N,O piconyl (energy =  $-2124526.64$  kcal/mol) binding mode of  $[2]ClO_4$  and (b) N(imidazopyridine)/O(piconyl) (energy =  $-2124524.76$  kcal/mol) binding mode of  $[2]ClO_4$ .

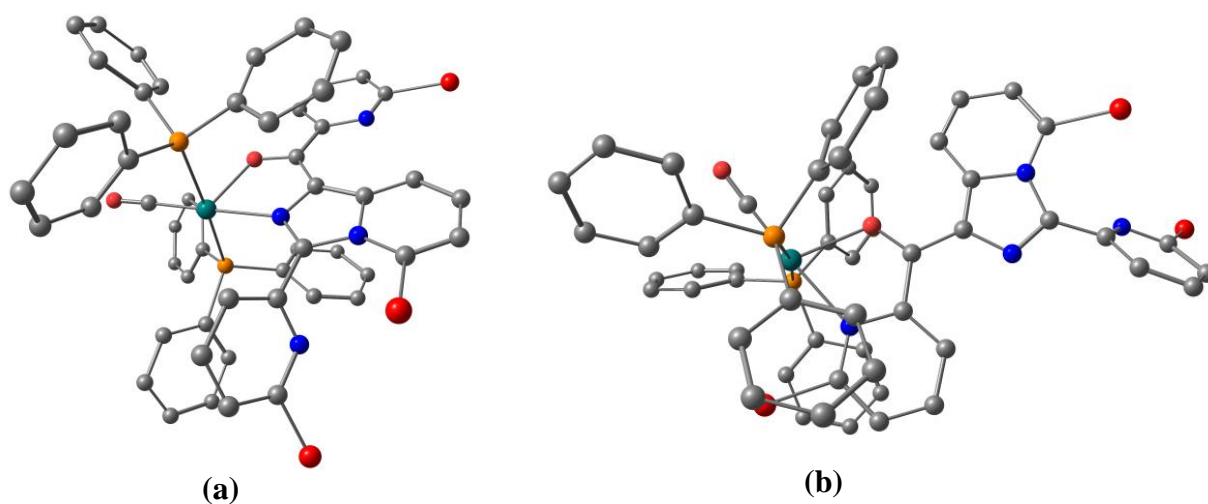

**Fig. S9b** (a) N(imidazopyridine)/O(piconyl) (energy =  $-6890104.002$  kcal/mol) binding mode of  $[3]ClO_4$  and (b) N,O piconyl (energy =  $-6890101.304$  kcal/mol) binding mode of  $[3]ClO_4$ .



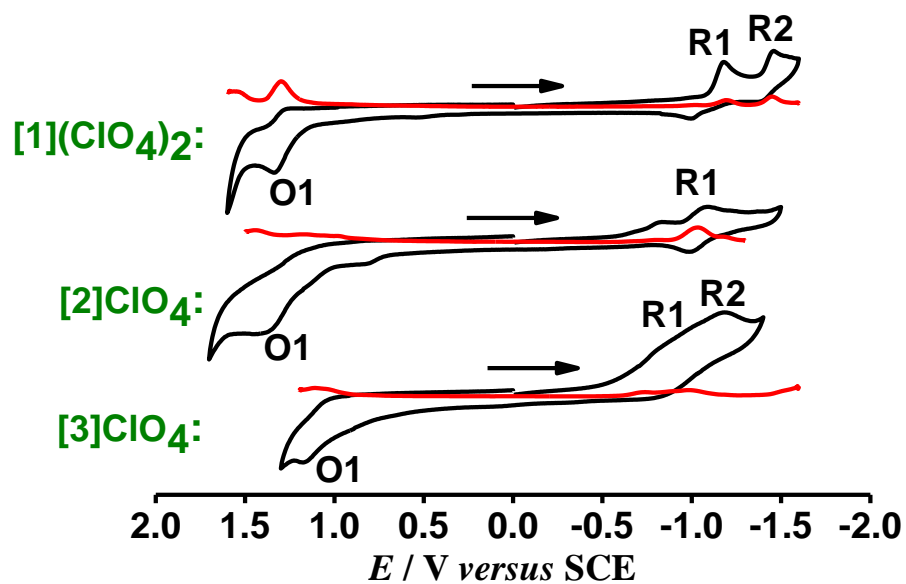

**Fig. S10a** Cyclic (black) and differential pulse (red) voltammograms in  $\text{CH}_3\text{CN}/0.1$   $\text{MEt}_4\text{NClO}_4$ .

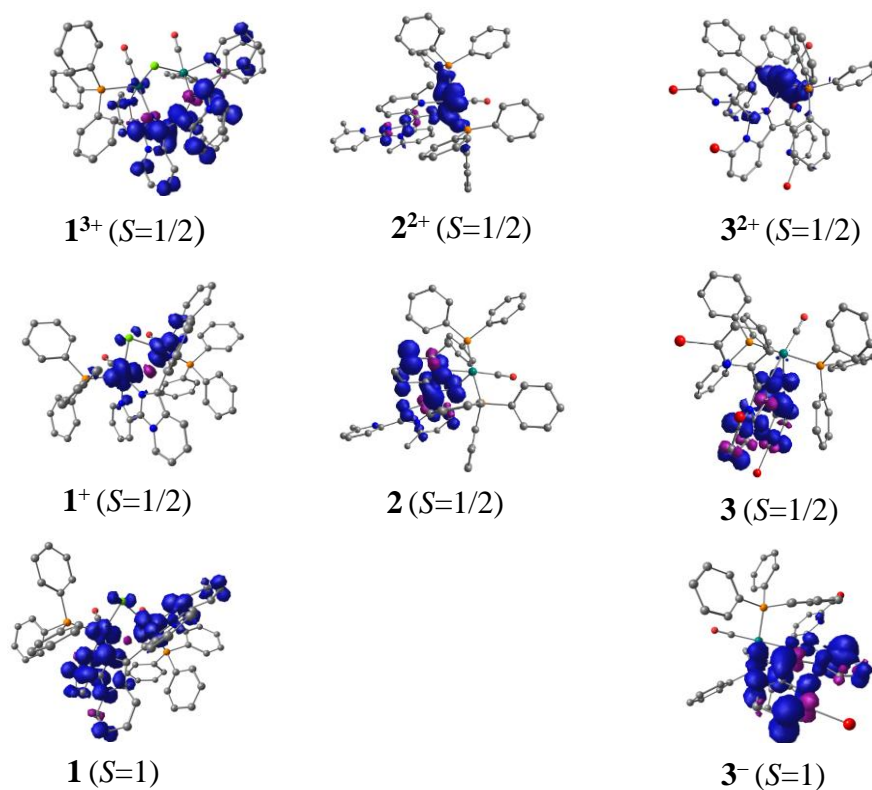

**Fig. S10b** DFT calculated Mulliken spin density plots (isosurface value 0.002).

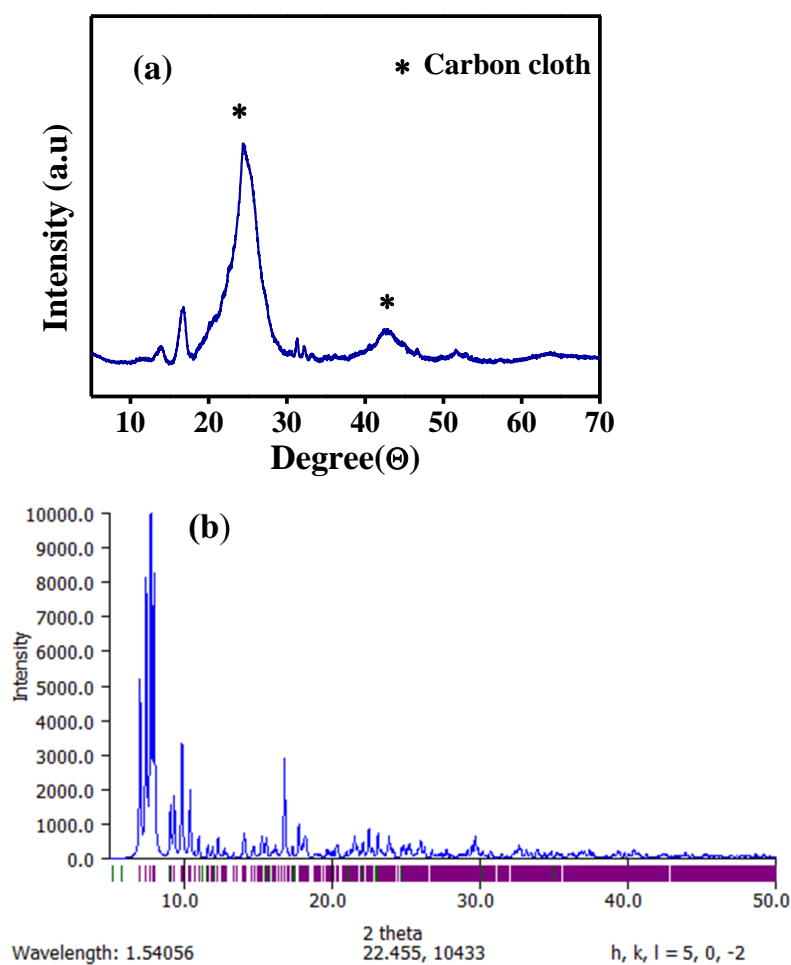

**Fig. S11** (a) Powder X-ray diffraction pattern of  $[1](\text{ClO}_4)_2$  after deposition on CC. (b) PXRD pattern of  $[1](\text{ClO}_4)_2$  as deduced from the single crystal diffraction data. The peaks at  $2\theta$  values 11, 14 and 17 are in agreement with the simulated PXRD data of molecular complex, implying the retention of molecular structure on carbon cloth support.

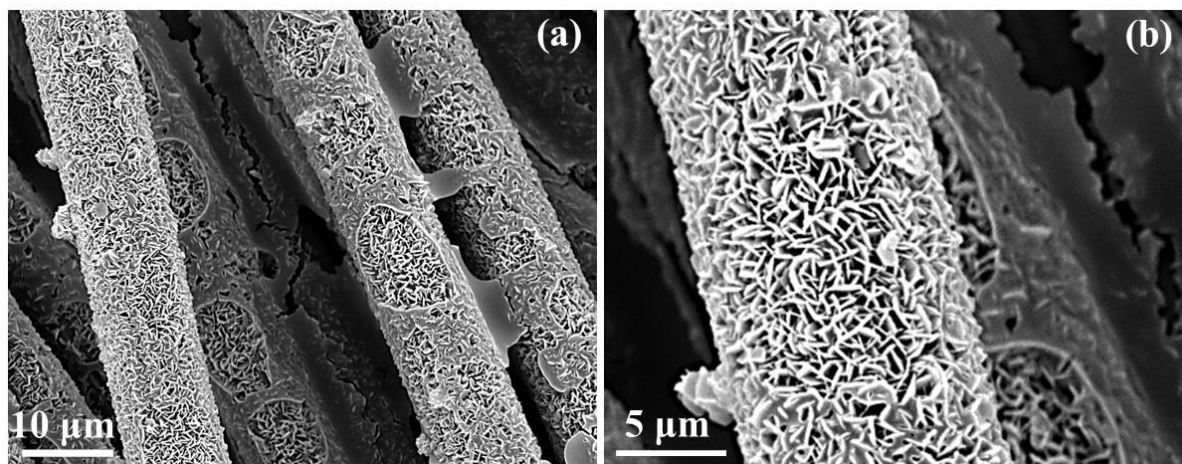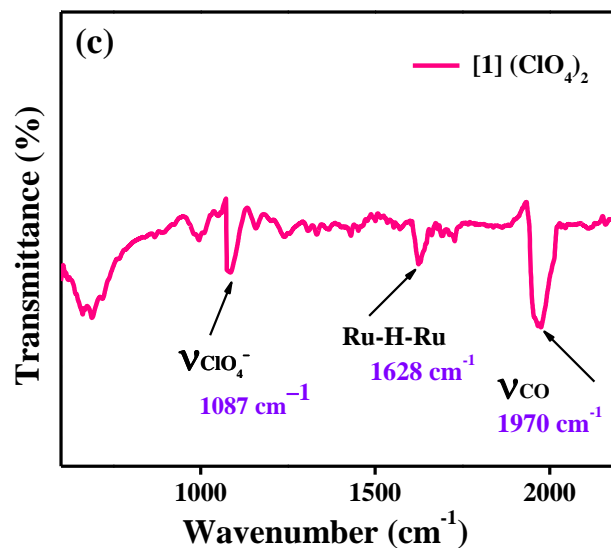

**Fig. S12** (a-b) SEM image of  $[1](\text{ClO}_4)_2$  after deposition on CC showing homogeneous dispersion of catalyst; (c) IR spectrum of  $[1](\text{ClO}_4)_2$  on CC. Peaks align well with the powder sample, suggesting that the molecular structure remains intact after deposition onto the carbon cloth. The carbonyl and Ru-H-Ru peaks have shifted to negative wavenumbers, indicating interaction between the catalyst and the carbon cloth support.

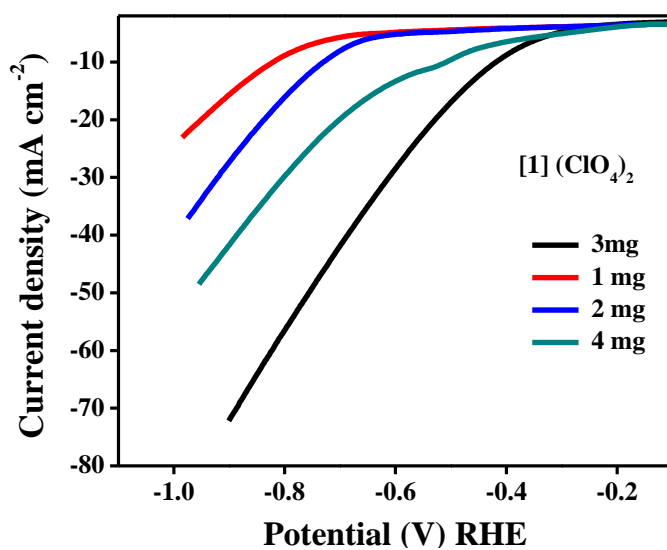

**Fig. S13** HER activity of [1](ClO<sub>4</sub>)<sub>2</sub> with different amount of loading. With increasing amount of catalyst loading (1-4 mg) on CC, the HER activity increases up to 3 mg of loading. After the excess loading, no improvement was observed. In addition, higher loading crosses the limit of carbon cloth to hold the catalyst on it, causing leaching and inhomogeneous distribution of the catalyst on the support. Scan rate: 5 mV s<sup>-1</sup>.

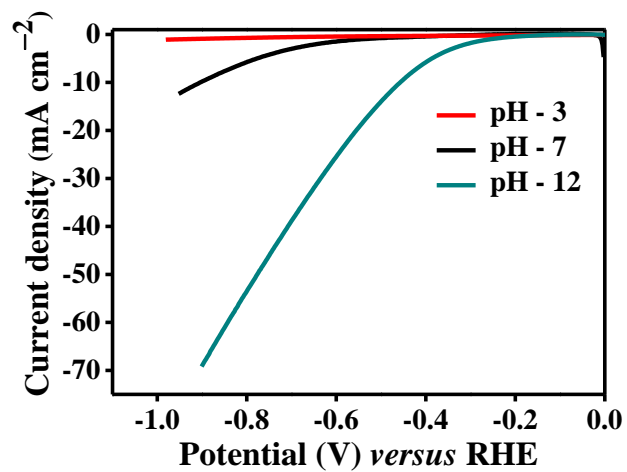

**Fig. S14** Linear sweep voltammetric profiles for electrochemical hydrogen evolution with [1](ClO<sub>4</sub>)<sub>2</sub> at different pH values, showing the best catalytic activity at pH 12. Scan rate: 5 mV s<sup>-1</sup>.

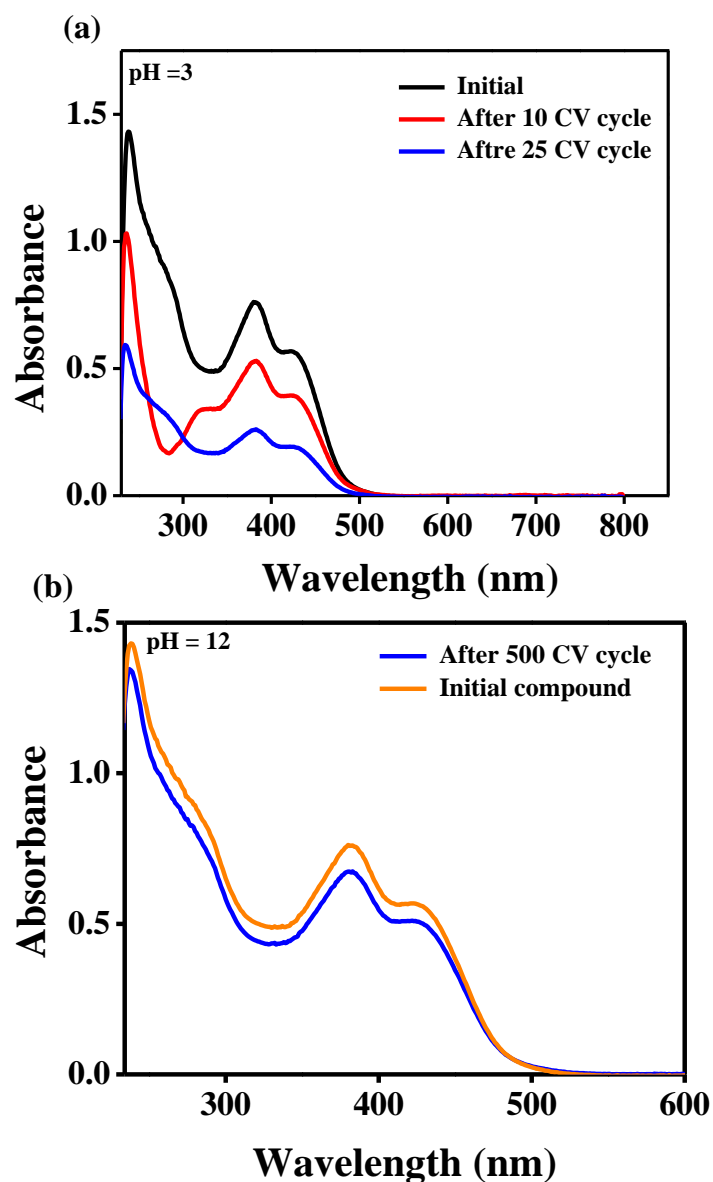

**Fig. S15** (a) UV-vis spectra of [1](ClO<sub>4</sub>)<sub>2</sub> after HER in dichloromethane showing the leaching of catalyst in the acidic medium (pH 3). After 10 CV cycles in the acidic medium, 34% of the catalyst was leached out from the carbon cloth, while the leaching was increased to 67% after 25 CV cycles; (b) UV-vis spectra of [1](ClO<sub>4</sub>)<sub>2</sub> after 500 CV cycles at pH 12 showing 88% retention of the catalyst.

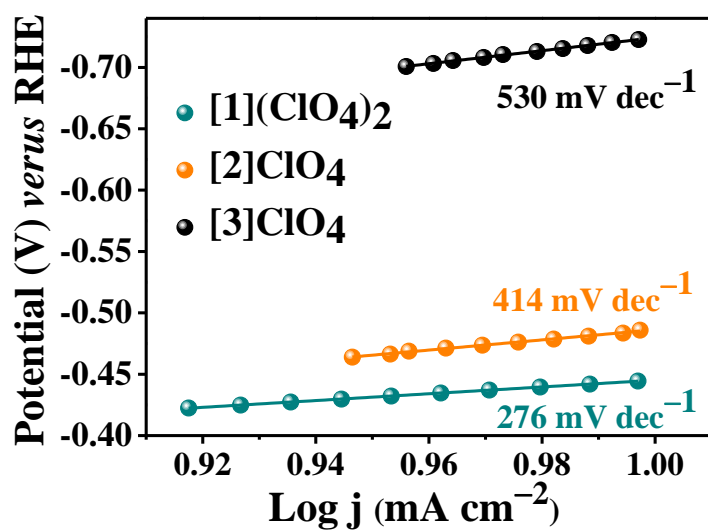

**Fig. S16** Tafel analyses of the synthesised complexes under semi-stationary conditions.

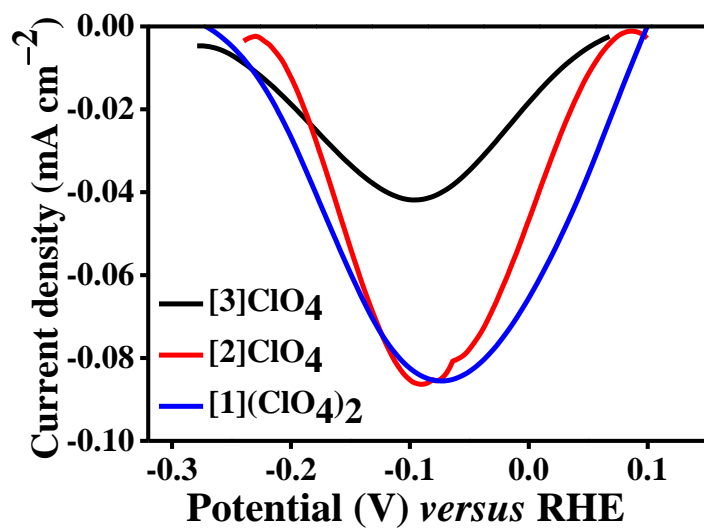

**Fig. S17** Reduction peaks for complexes [1](ClO<sub>4</sub>)<sub>2</sub>, [2]ClO<sub>4</sub> and [3]ClO<sub>4</sub> were utilised to calculate the number of active Ru-sites.



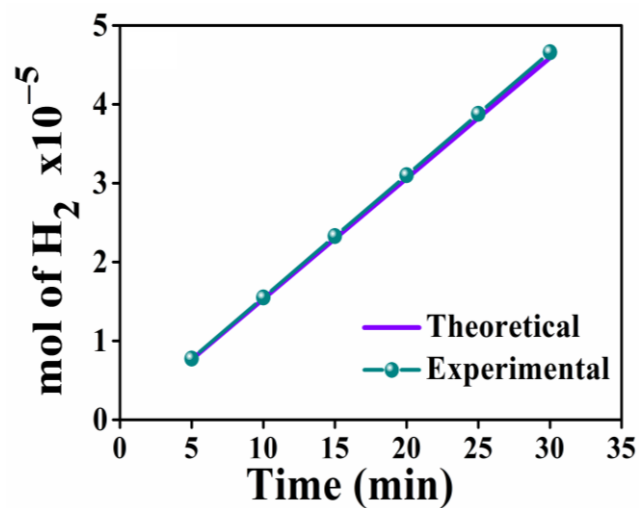

**Fig. S18** Faradaic efficiency determined for [1](ClO<sub>4</sub>)<sub>2</sub> by comparing the amount of hydrogen produced (experimentally) with that of the theoretical values.

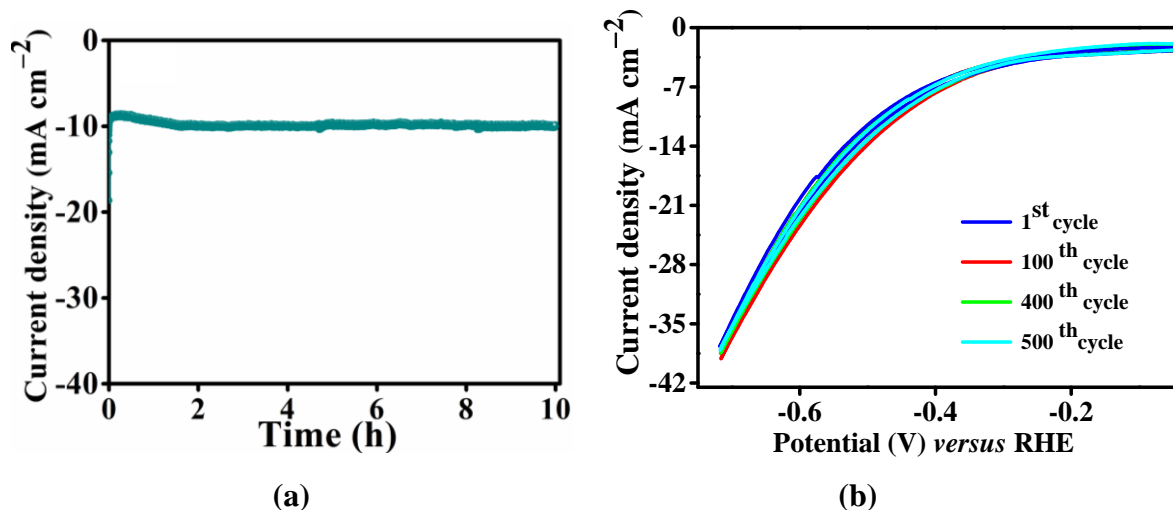

**Fig. S19** (a) Chronoamperometric stability test of complex  $[1](\text{ClO}_4)_2$  over a period of 10 h at  $-0.45$  V vs RHE; (b) Cyclic voltammetric experiments reflecting no significant decrease in activity till 500 CV cycles (Scan rate:  $20 \text{ mV s}^{-1}$ ).

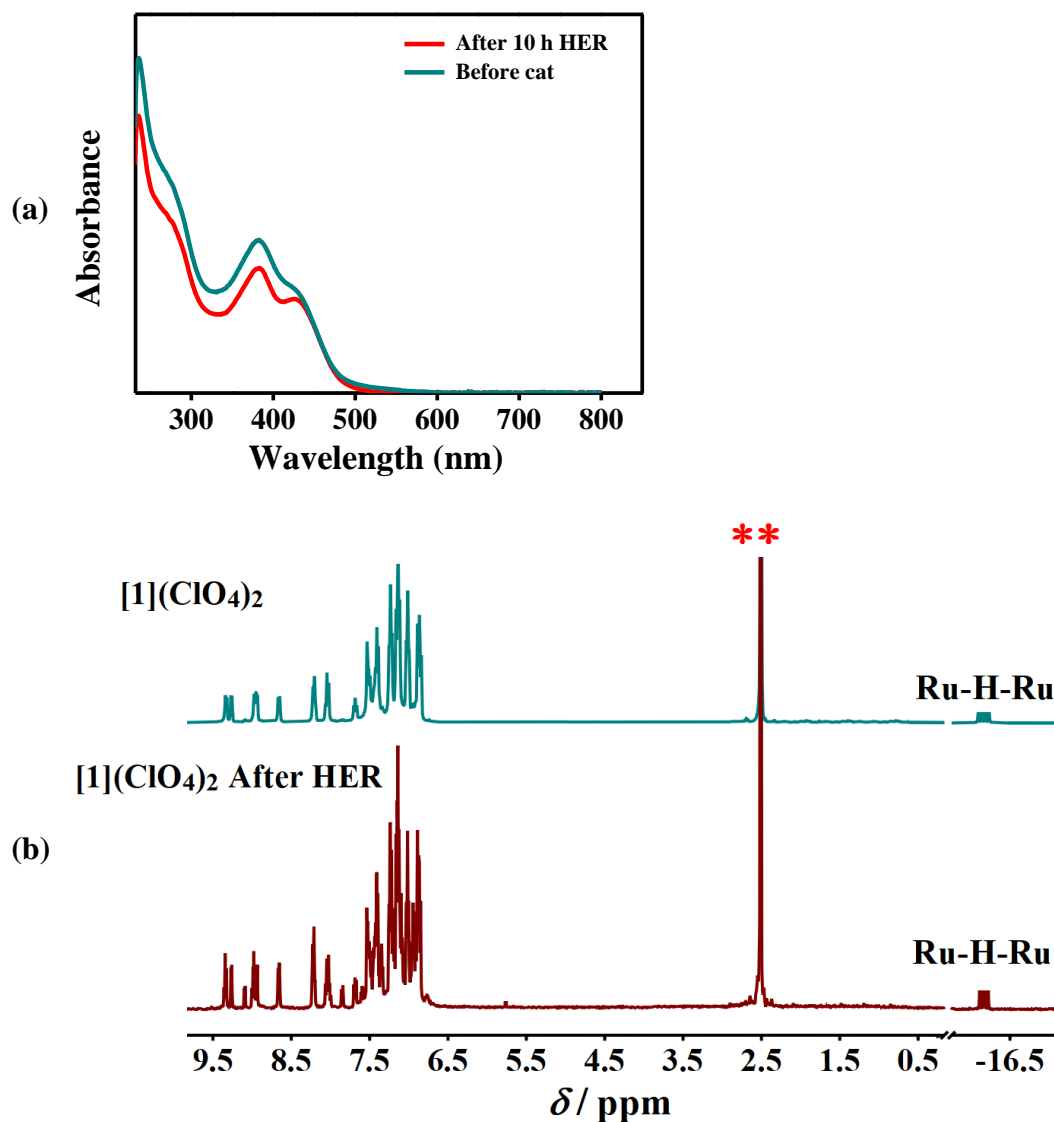

**Fig. S20** (a) UV-vis spectra of  $[1](\text{ClO}_4)_2$  in dichloromethane showing no shift in peak position even after 10 h of CA HER, indicating the retention of the molecular entity after HER. (b)  $^1\text{H}$  NMR spectra before and after the HER process showing no change of the Ru-H-Ru peak position as well as the structure of the catalyst.

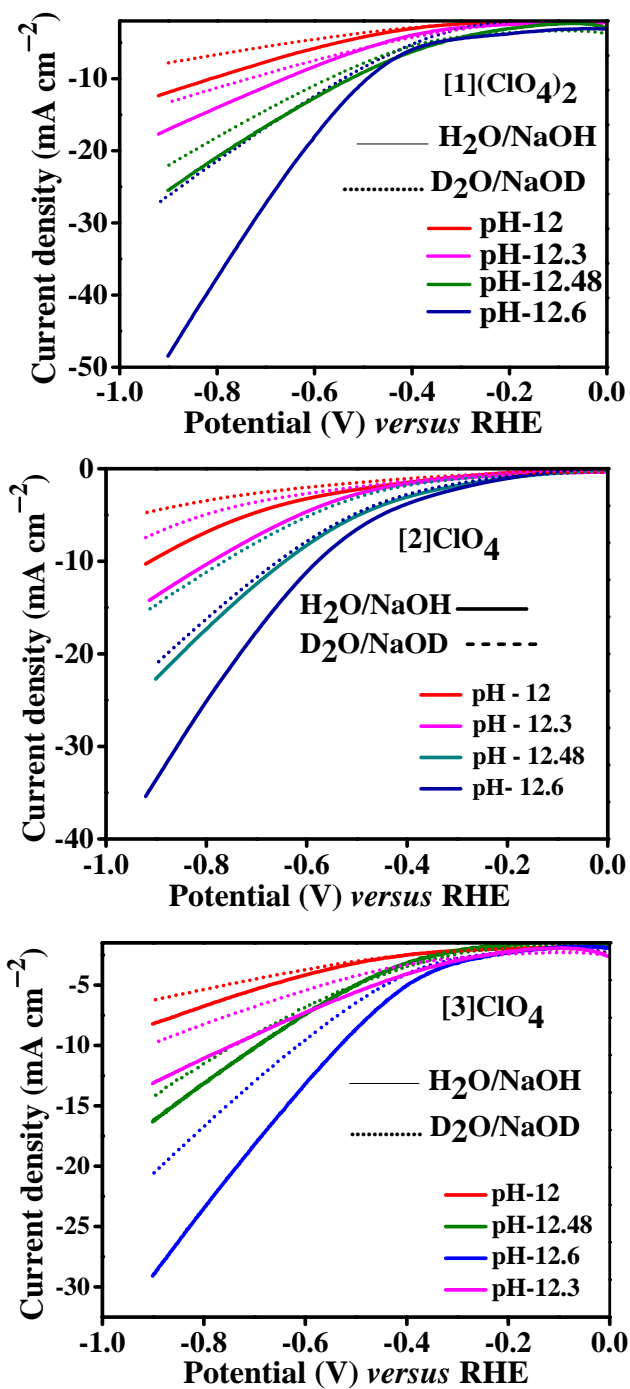

**Fig. S21** LSV curves in NaOH/H<sub>2</sub>O and NaOD/D<sub>2</sub>O at different pHs (Scan rate: 5 mV s<sup>-1</sup>).

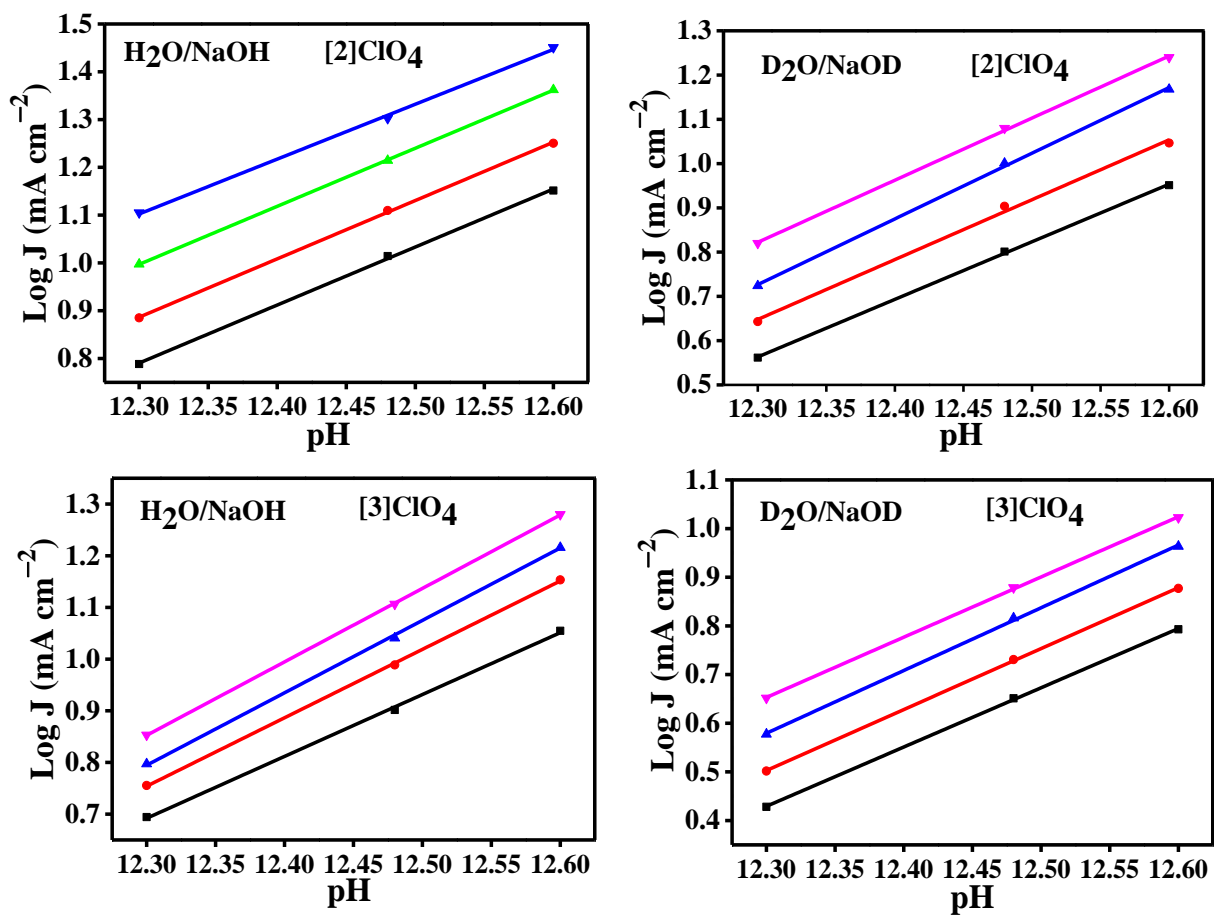

**Fig. S22** The pH-dependent kinetic study in H<sub>2</sub>O/ NaOH and D<sub>2</sub>O/NaOD.

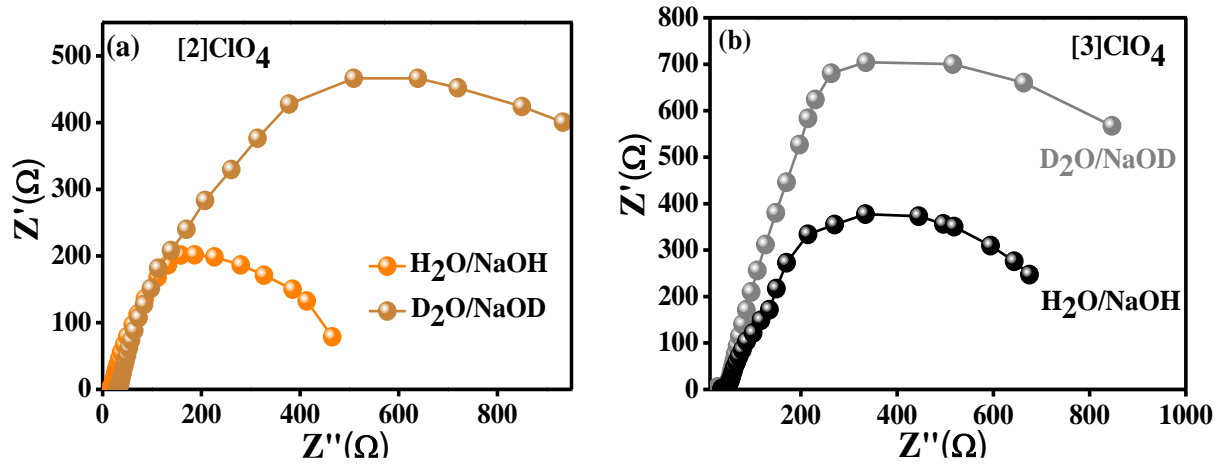

**Fig. S23** EIS curves of complexes (a)  $[2]ClO_4$  and (b)  $[3]ClO_4$  in  $H_2O/NaOH$  and  $D_2O/NaOD$ .

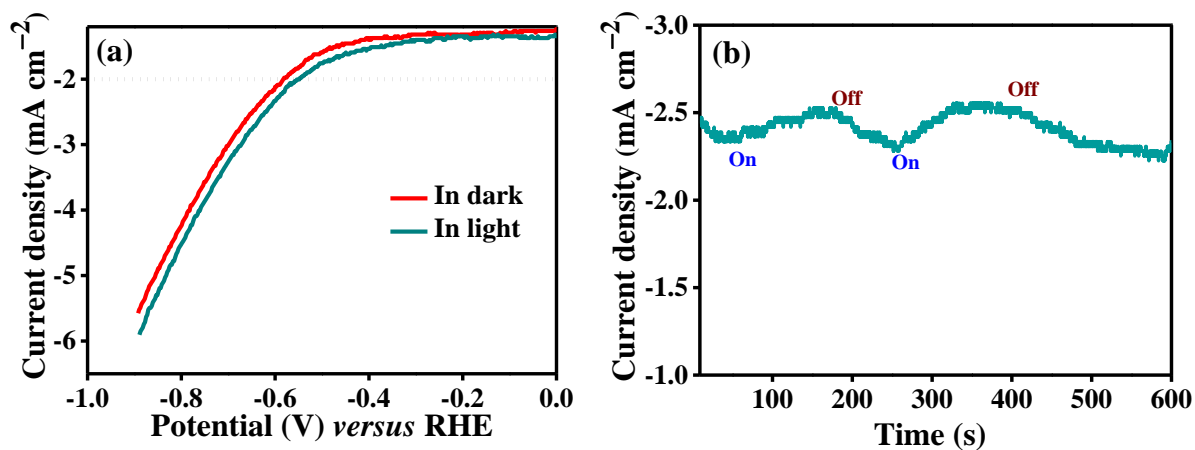

**Fig. S24** (a) Linear sweep voltammetric profiles for photoelectrochemical hydrogen evolution with  $[1](\text{ClO}_4)_2$  (Scan rate:  $5 \text{ mV s}^{-1}$ ) and (b) Photocurrent measurements at chopped light (Potential:  $-0.38 \text{ V vs RHE}$ ).

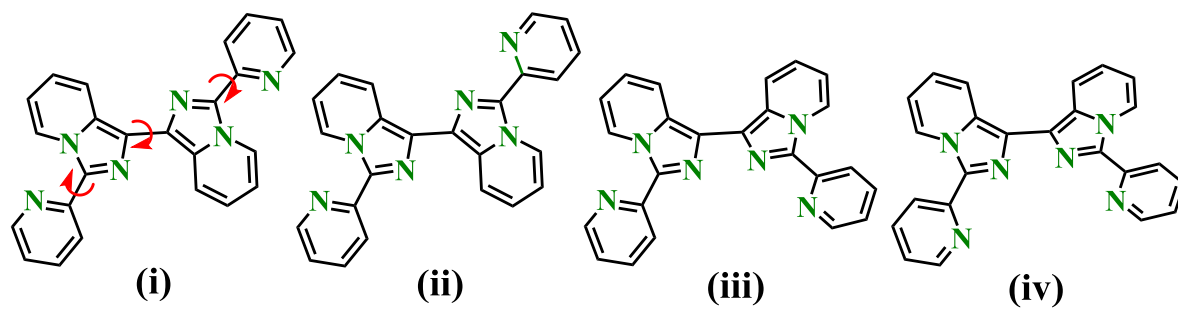

**Scheme S1** Varying configuration of L1.



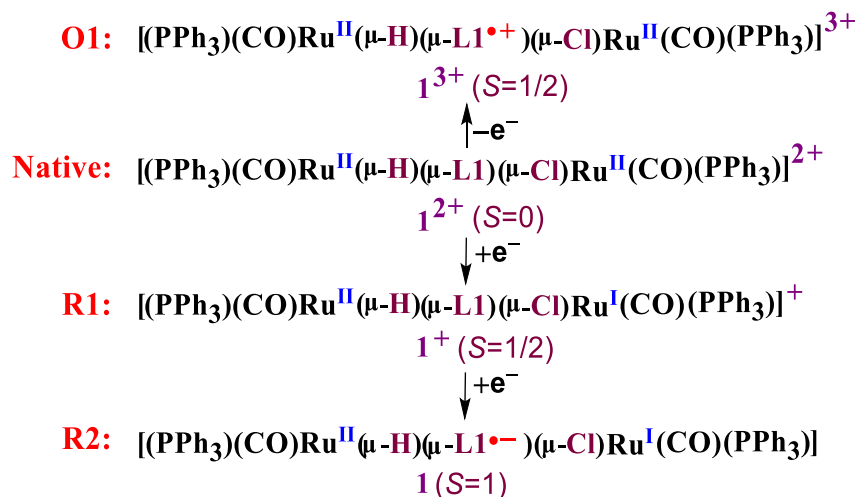

Scheme S2 Electronic forms for  $1^n$ .

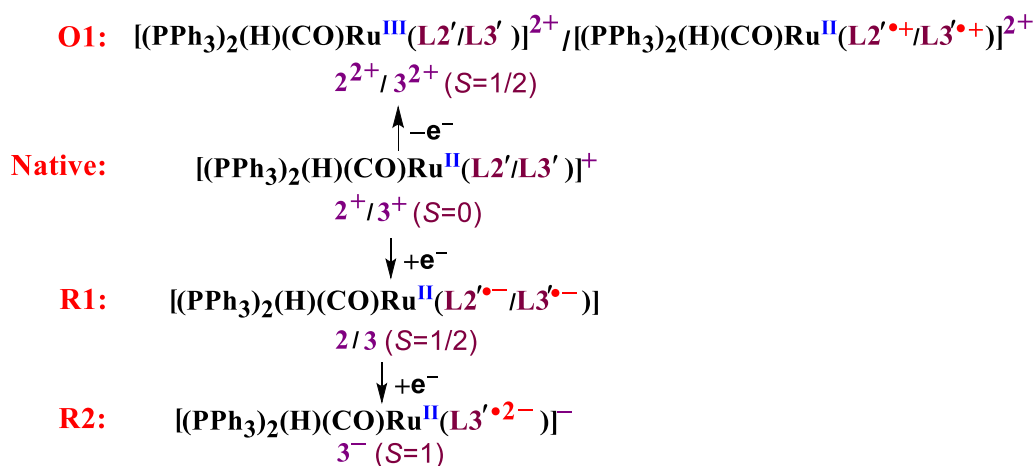

Scheme S3 Electronic forms for  $2^n/3^n$ .

**Equation S1:**

[1](ClO<sub>4</sub>)<sub>2</sub>:

Calculated area associated with the reduction peak =  $0.000823 \times 10^{-3} \text{ V A}$

Hence the associated charge was =  $0.000823 \times 10^{-3} \text{ V A} / 0.05 \text{ V s}^{-1}$

$$= 0.01646 \times 10^{-3} \text{ As}$$

$$= 0.01646 \times 10^{-3} \text{ C}$$

Now, the number of electron transferred was =  $0.01646 \times 10^{-3} \text{ C} / 1.602 \times 10^{-19} \text{ C}$

$$= 10.23 \times 10^{13}$$

The number of electrons calculated above was the same as the number of the surface active sites due to a single electron transfer involving the Ru<sup>2+</sup>/Ru<sup>1+</sup> reduction.

Hence, the surface-active sites that participated in HER =  **$10.23 \times 10^{13}$**

[2]ClO<sub>4</sub>:

Calculated area associated with the reduction peak =  $0.000831 \times 10^{-3} \text{ V A}$

Hence the associated charge was =  $0.000831 \times 10^{-3} \text{ V A} / 0.05 \text{ V s}^{-1}$

$$= 0.01662 \times 10^{-3} \text{ As}$$

$$= 0.01662 \times 10^{-3} \text{ C}$$

Now, the number of electron transferred was =  $0.01662 \times 10^{-3} \text{ C} / 1.602 \times 10^{-19} \text{ C}$

$$= 10.37 \times 10^{13}$$

The surface-active site that participated in HER =  **$10.37 \times 10^{13}$**

[3]ClO<sub>4</sub>:

Calculated area associated with the reduction peak =  $0.000370 \times 10^{-3} \text{ V A}$

Hence the associated charge was =  $0.000370 \times 10^{-3} \text{ V A} / 0.05 \text{ V s}^{-1}$

$$= 0.0074 \times 10^{-3} \text{ As}$$

$$= 0.0074 \times 10^{-3} \text{ C}$$

Now, the number of electron transferred was =  $0.0074 \times 10^{-3} \text{ C} / 1.602 \times 10^{-19} \text{ C}$

$$= 4.61 \times 10^{13}$$

The surface-active site that participated in HER =  $4.61 \times 10^{13}$

### Equation S2: Calculation of Turn over frequency (TOF) of different catalysts

$$\text{TOF} = (j \times N_A) / (2 \times F \times n)$$

Where,

**j** = current density at  $\eta = 445 \text{ mV}$

**N<sub>A</sub>** = Avogadro number

**F** = Faraday constant

**n** = number of active Ru-sites

#### TOF calculation at 445 mV *versus* RHE

[1](ClO<sub>4</sub>)<sub>2</sub>:

$$\text{TOF} = [(10 \times 10^{-3}) (6.023 \times 10^{23})] / [(96485) (2) (10.23 \times 10^{13})]$$

$$\text{TOF} = 305.1 \text{ s}^{-1}$$

[2]ClO<sub>4</sub>:

$$\text{TOF} = [(7.99 \times 10^{-3}) (6.023 \times 10^{23})] / [(96485) (2) (10.37 \times 10^{13})]$$

$$\text{TOF} = 252.9 \text{ s}^{-1}$$

[3]ClO<sub>4</sub>:

$$\text{TOF} = [(3.66 \times 10^{-3}) (6.023 \times 10^{23})] / [(96485) (2) (4.61 \times 10^{13})]$$

$$\text{TOF} = 110.1 \text{ s}^{-1}$$

### Equation S3:

#### Calculation of Turn-Over Number (TON) for [1](ClO<sub>4</sub>)<sub>2</sub> after 30 minutes HER

TON = moles of produced H<sub>2</sub> / Moles of active Ru-sites

$$\begin{aligned} &= 4.66 \times 10^{-5} \text{ mole of H}_2 / (10.23 \times 10^{13} / 6.023 \times 10^{23}) \text{ mole active Ru-sites} \\ &= 2.74 \times 10^5 \end{aligned}$$

### Equation S4:

#### Determination of the faradaic efficiency of complex [1](ClO<sub>4</sub>)<sub>2</sub>

We have utilised the water displacement method to detect the amount of generated hydrogen.

Two-compartment membrane-separated H-cell have been employed to determine the generated hydrogen. We have employed a cathodic current density of  $-5 \text{ mA cm}^{-2}$  for 1800 s.

In the first step, we calculated the theoretically generated hydrogen gas using the following equation from Faraday's law. The amount of H<sub>2</sub> generated was determined by following the equation S4.1:

$$n\text{H}_2(\text{theoretical}) = \frac{Q}{n \times F} = \frac{I \times t}{n \times F} = \frac{0.005 \times 1800 \text{ s}}{2 \times 96485.3 \text{ s A mol}^{-1}} = 0.0000466 \quad (\text{S4.1})$$

Where  $n\text{H}_2$ ,  $Q$ ,  $n$ ,  $F$ ,  $I$  and  $t$  represented theoretically calculated amount of H<sub>2</sub>, amount of applied charge, number of electrons transferred in HER (2 electrons), Faraday constant ( $96485.3 \text{ s A mol}^{-1}$ ), applied current (0.005 A) and reaction time (1800 s), respectively.

After theoretical calculations, the amount of generated hydrogen in mmol at the time of chronoamperometric measurements was measured. Experimentally measured and theoretically calculated amount of hydrogen was then compared to determine the Faradaic efficiency using the following equation S4.2:

$$\text{Faradaic efficiency (\%)} = \frac{n\text{H}_2(\text{experimental})}{n\text{H}_2(\text{Theoretical})} \times 100 = \frac{0.0000459}{0.0000466} \times 100 = 98.4\% \quad (\text{S4.2})$$

**A link of short video showing the vigorous hydrogen evolution at the cathode:**

<https://drive.google.com/file/d/10gamCo61vyuTWjAkpeg3wE9FMKqKw5nP/view?usp>

[=sharing](#)

**Table S1** Selected crystallographic parameter

| Complex                                            | L3                                                             | [1](ClO <sub>4</sub> ) <sub>2</sub>                                                                              | [2]ClO <sub>4</sub>                                                                  | [3]ClO <sub>4</sub>                                                                                                |
|----------------------------------------------------|----------------------------------------------------------------|------------------------------------------------------------------------------------------------------------------|--------------------------------------------------------------------------------------|--------------------------------------------------------------------------------------------------------------------|
| empirical formula                                  | C <sub>24</sub> H <sub>12</sub> Br <sub>4</sub> N <sub>6</sub> | C <sub>62</sub> H <sub>47</sub> Cl <sub>3</sub> N <sub>6</sub> O <sub>10</sub><br>P <sub>2</sub> Ru <sub>2</sub> | C <sub>58</sub> H <sub>49</sub> ClN <sub>4</sub> O <sub>6</sub><br>P <sub>2</sub> Ru | C <sub>56</sub> H <sub>41</sub> Br <sub>3</sub> Cl <sub>4</sub> N <sub>4</sub> O <sub>6</sub><br>P <sub>2</sub> Ru |
| formula weight                                     | 704.04                                                         | 1406.48                                                                                                          | 1096.47                                                                              | 1410.47                                                                                                            |
| crystal system                                     | monoclinic                                                     | monoclinic                                                                                                       | triclinic                                                                            | monoclinic                                                                                                         |
| space group                                        | <i>-I 2ya</i>                                                  | <i>-P 2ybc</i>                                                                                                   | <i>P-1</i>                                                                           | <i>-P 2ybc</i>                                                                                                     |
| <i>a</i> (Å)                                       | 11.9288(5)                                                     | 19.7908(5)                                                                                                       | 15.6010(2)                                                                           | 18.3915(2)                                                                                                         |
| <i>b</i> (Å)                                       | 6.8445(3)                                                      | 15.1911(4)                                                                                                       | 21.1050(3)                                                                           | 14.4654(2)                                                                                                         |
| <i>c</i> (Å)                                       | 27.4989(11)                                                    | 23.1446(8)                                                                                                       | 22.1703(3)                                                                           | 20.9301(3)                                                                                                         |
| <i>α</i> (deg)                                     | 90                                                             | 90                                                                                                               | 110.1520(10)                                                                         | 90                                                                                                                 |
| <i>β</i> (deg)                                     | 90.376(4)                                                      | 107.604(3)                                                                                                       | 101.1340(10)                                                                         | 100.8040(10)                                                                                                       |
| <i>γ</i> (deg)                                     | 90                                                             | 90                                                                                                               | 99.6610(10)                                                                          | 90                                                                                                                 |
| <i>V</i> (Å <sup>3</sup> )                         | 2245.15(16)                                                    | 6632.4(3)                                                                                                        | 6502.66(16)                                                                          | 5469.55(13)                                                                                                        |
| <i>Z</i>                                           | 4                                                              | 4                                                                                                                | 4                                                                                    | 4                                                                                                                  |
| <i>μ</i> (mm <sup>-1</sup> )                       | 7.198                                                          | 0.683                                                                                                            | 0.376                                                                                | 2.787                                                                                                              |
| <i>T</i> (K)                                       | 109.5(7)                                                       | 150.00(10)                                                                                                       | 150.00(10)                                                                           | 150.00(10)                                                                                                         |
| <i>D</i> <sub>calcd</sub> (g cm <sup>-3</sup> )    | 2.083                                                          | 1.409                                                                                                            | 1.120                                                                                | 1.713                                                                                                              |
| <i>F</i> (000)                                     | 1352.0                                                         | 2840.0                                                                                                           | 2256                                                                                 | 2800.0                                                                                                             |
| <i>θ</i> range(deg)                                | 5.926-49.99                                                    | 1.6390-19.6720                                                                                                   | 1.784-23.889                                                                         | 1.747-29.618                                                                                                       |
| data/restraints/<br>parameters                     | 1984/0/154                                                     | 11661/26/788                                                                                                     | 22925/0/1306                                                                         | 9625/0/689                                                                                                         |
| R1, wR2<br>[ <i>I</i> > 2σ( <i>I</i> )]            | 0.0637,<br>0.1541                                              | 0.0583, 0.128                                                                                                    | 0.0772, 0.1433                                                                       | 0.0392, 0.0831                                                                                                     |
| R1, wR2(all data)                                  | 0.1031,<br>0.1786                                              | 0.1132, 0.1515                                                                                                   | 0.0545, 0.1610                                                                       | 0.0330, 0.0869                                                                                                     |
| GOF                                                | 1.011                                                          | 1.028                                                                                                            | 1.032                                                                                | 1.014                                                                                                              |
| largest diff.<br>peak/hole [e<br>Å <sup>-3</sup> ] | 2.59/-0.91                                                     | 0.687/-0.689                                                                                                     | 0.930/-0.777                                                                         | 0.971/-1.169                                                                                                       |

**Table S2** Selected experimental and DFT calculated bond lengths (Å)

| Bond lengths<br>(Å) | [1](ClO <sub>4</sub> ) <sub>2</sub> |       | [2]ClO <sub>4</sub> |       | [3]ClO <sub>4</sub> |        |
|---------------------|-------------------------------------|-------|---------------------|-------|---------------------|--------|
|                     | X-ray                               | DFT   | X-ray               | DFT   | X-ray               | DFT    |
| Ru1-N1              | 2.119(4)                            | 2.172 | 2.171(3)            | 2.243 | 2.148(3)            | 2.191  |
| Ru1-N2              | 2.142(4)                            | 2.210 | -                   | -     | -                   | -      |
| Ru2-N5              | 2.064(4)                            | 2.194 | -                   | -     | -                   | -      |
| Ru2-N4              | 2.121(4)                            | 2.121 | -                   | -     | -                   | -      |
| Ru1-C61             | 1.832(6)                            | 1.868 | -                   | -     | -                   | -      |
| Ru2-C60             | 1.839(7)                            | 1.873 | -                   | -     | -                   | -      |
| Ru1-P1              | 2.2713(16)                          | 2.444 | 2.3612(10)          | 2.446 | 2.3520(8)           | 2.451  |
| Ru1-P2              | -                                   | -     | 2.3543(10)          | 2.447 | 2.3670(8)           | 2.447  |
| Ru2-P2              | 2.3249(16)                          | 2.379 | -                   | -     | -                   | -      |
| Ru1-H               | 1.66(5)                             | 1.860 | 1.72(3)             | 1.59  | 1.62(3)             | 1.587  |
| Ru2-H               | 1.85(5)                             | 1.744 | -                   | -     | -                   | -      |
| Ru1-Cl1             | 2.4353(16)                          | 2.489 | -                   | -     | -                   | -      |
| Ru2-Cl1             | 2.3846(15)                          | 2.534 | -                   | -     | -                   | -      |
| C5-N1               | 1.368(7)                            | 1.361 | -                   | -     | -                   | -      |
| C6-N2               | 1.329(6)                            | 1.366 | -                   | -     | -                   | -      |
| C19-N4              | 1.338(7)                            | 1.344 | -                   | -     | -                   | -      |
| C20-N5              | 1.346(7)                            | -     | -                   | -     | -                   | -      |
| C5-C6               | 1.426(7)                            | 1.369 | -                   | -     | -                   | -      |
| C12-C13             | 1.434(7)                            | 1.450 | -                   | -     | -                   | -      |
| C19-C20             | 1.439(7)                            | 1.454 | -                   | -     | -                   | -      |
| Ru1-Ru2             | 2.8588(6)                           | 3.034 | -                   | -     | -                   | -      |
| Ru1-O1              | -                                   | -     | 2.151(2)            | 2.230 | 2.208(2)            | 2.262  |
| Ru1-C54             | -                                   | -     | 1.853(5)            | 1.861 |                     |        |
| Ru1-C55             | -                                   | -     | -                   | -     | 1.836(3)            | 1.8675 |
| C1-O1               | -                                   | -     | 1.253(4)            | 1.256 | 1.254(4)            | 1.256  |
| C61-O1              | 1.139(6)                            | 1.154 | -                   | -     | -                   | -      |
| C60-O2              | 1.139(6)                            | 1.154 | -                   | -     | -                   | -      |
| C58-O2              | -                                   | -     | 1.127(5)            | 1.160 | -                   | -      |
| C55-O2              |                                     |       | -                   | -     | 1.164(4)            | 1.158  |
| C2-N1               | -                                   | -     | 1.376(4)            | 1.368 | 1.381(4)            | 1.387  |
| C15-C16             | -                                   | -     | 1.481(5)            | 1.501 | 1.481(5)            | 1.415  |
| C1-C2               | -                                   | -     | 1.497(5)            | 1.503 | 1.494(4)            | 1.484  |
| Ru2-O7              |                                     |       | 2.147(3)            | 2.148 |                     |        |
| Ru2-N5              |                                     |       | 2.174(3)            | 2.168 |                     |        |

**Table S3a** Selected experimental and DFT calculated bond lengths (Å)

| Bond lengths<br>(Å) | L3        |       |
|---------------------|-----------|-------|
|                     | X-ray     | DFT   |
| N1-C7               | 1.332(12) | 1.329 |
| N1-C1               | 1.357(11) | 1.357 |
| N2-C12              | 1.296(11) | 1.315 |
| N3-C2               | 1.416(11) | 1.421 |
| C9-C8               | 1.402(13) | 1.402 |
| C9-C10              | 1.369(13) | 1.409 |
| C7-C8               | 1.490(12) | 1.468 |

**Table S3b** Selected experimental and DFT calculated bond angles (deg)

| Bond Angles<br>(deg) | L3       |       |
|----------------------|----------|-------|
|                      | X-ray    | DFT   |
| N1-C1-C2             | 111.5(8) | 109.7 |
| C1-C2-C3             | 136.3(8) | 134.4 |
| N1-C7-N3             | 136.3(8) | 134.8 |
| C8-C7-N1             | 122.0(9) | 1.421 |
| C4-C3-C2             | 120.3(9) | 122.7 |



**Table S4** Selected experimental and DFT calculated bond angles (deg)

| Bond angles<br>(deg) | [1](ClO <sub>4</sub> ) <sub>2</sub> |        | [2]ClO <sub>4</sub> |        | [3]ClO <sub>4</sub> |        |
|----------------------|-------------------------------------|--------|---------------------|--------|---------------------|--------|
|                      | X-ray                               | DFT    | X-ray               | DFT    | X-ray               | DFT    |
| N1-Ru1-N2            | 76.39(17)                           | 76.14  | -                   | -      | -                   | -      |
| N2-Ru1-P1            | 95.60(12)                           | 90.74  | -                   | -      | -                   | -      |
| Cl1-Ru1-H            | 90.7(17)                            | 84.99  | -                   | -      | -                   | -      |
| P2-Ru1-Ru1           | 115.79(4)                           | 117.88 | -                   | -      | -                   | -      |
| Ru1-Cl1-Ru2          | 52.81(4)                            | 74.31  | -                   | -      | -                   | -      |
| Ru1-H-Ru2            | 37.9(17)                            | 114.58 | -                   | -      | -                   | -      |
| N4-Ru2-N5            | 76.86(17)                           | 75.83  | -                   | -      | -                   | -      |
| N5-Ru2-P2            | 90.45(12)                           | 94.96  | -                   | -      | -                   | -      |
| Cl1-Ru2-H            | 87.9(15)                            | 86.02  | -                   | -      | -                   | -      |
| N1-Ru1-O1            | 2.119(4)                            | -      | 73.64(8)            | 73.02  | 74.76(8)            | 72.00  |
| P2-Ru1-O1            | 2.142(4)                            | -      | 92.51(5)            | 93.42  | 92.26(6)            | 90.57  |
| P1-Ru1-N1            | 2.064(4)                            | -      | 90.94(5)            | 91.49  | 92.79(6)            | 91.63  |
| P2-Ru1-P1            | 2.121(4)                            | -      | 176.54(3)           | 171.63 | 174.92(3)           | 177.1  |
| H-Ru1-O1             | 1.368(7)                            | -      | 172.9(10)           | 170.72 | 170.0(10)           | 167.58 |
| C54-Ru1-N1           | 1.329(6)                            | -      | 178.49(11)          | 174.89 | -                   | -      |
| C55-Ru1-N1           | -                                   | -      | -                   | -      | 174.71(11)          | 179.21 |

**Table S5** Energies of DFT ((U)/(R)B3LYP/LanL2DZ/6-31G\*) optimised structures

| Complex              | <i>E</i> (Hartrees) |                       | $\Delta E_{(HE-LE)}^a$                                                         |
|----------------------|---------------------|-----------------------|--------------------------------------------------------------------------------|
|                      | <i>S</i> = 0        | <i>S</i> = 1          |                                                                                |
| <b>1</b>             | -4200.6441727       | <b>-4200.6481401</b>  | 0.0039674 Hartrees<br>870.74364706 cm <sup>-1</sup><br>10.416409493 kJ/mol     |
| <b>2<sup>-</sup></b> | -10980.2606765      | <b>-10980.2700783</b> | 0.0094018 Hartrees<br>2063.456576334 cm <sup>-1</sup><br>24.68442778036 kJ/mol |

<sup>a</sup>HE = Spin state in higher in energy and LE = Spin state in lower in energy.

**Table S6**  $\pi$ --- $\pi$  interaction in (Å)

| Interaction $\pi$ --- $\pi$ (Å) | [1](ClO <sub>4</sub> ) <sub>2</sub> | [2]ClO <sub>4</sub> | [3]ClO <sub>4</sub> |
|---------------------------------|-------------------------------------|---------------------|---------------------|
| C60---C56                       | 3.534                               | -                   | -                   |
| C37---C56                       | 3.552                               |                     |                     |
| C7---O6                         | 3.191                               | -                   | -                   |
| C11---O6                        | 3.085                               | -                   | -                   |
| C39---O4                        | 3.327                               | -                   |                     |
| C24---O7                        | 3.391                               | -                   | -                   |
| C23---O8                        | 3.318                               | -                   | -                   |
| C12---C37                       |                                     | 3.499               |                     |
| C11---C37                       | -                                   | 3.499               | -                   |
| C4---O6                         | -                                   | 3.169               | -                   |
| C47---O5                        |                                     | 3.386               |                     |
| C41---C13                       | -                                   | -                   | 3.487               |
| C39---C52                       | -                                   | -                   | 3.513               |
| C53---C46                       | -                                   | -                   | 3.472               |
| C5---O5                         | -                                   | -                   | 3.285               |
| C6---O5                         | -                                   | -                   | 3.178               |

**Table S7** Experimental and TD-DFT (B3LYP/6-31G\*/LANL2DZ) calculated electronic transitions.

| $\lambda_{\max}/\text{nm}$ (expt.) <sup>a</sup><br>( $\epsilon/\text{dm}^3\text{mol}^{-1}\text{cm}^{-1}$ ) <sup>b</sup> | $\lambda/\text{nm}$<br>(DFT) ( $f$ ) <sup>c</sup> | Transitions         | Character                           |
|-------------------------------------------------------------------------------------------------------------------------|---------------------------------------------------|---------------------|-------------------------------------|
| <b>1<sup>2+</sup> (S=0)</b>                                                                                             |                                                   |                     |                                     |
| 429 (39000)                                                                                                             | 412 (0.09)                                        | HOMO-3→LUMO+2(0.34) | Ru(dπ)/PPh <sub>3</sub> (π)→L1(π*)  |
| 380 (59000)                                                                                                             | 385 (0.02)                                        | HOMO-2→LUMO(0.34)   | Ru(dπ)/PPh <sub>3</sub> (π)→L1(π*)  |
|                                                                                                                         | 369 (0.60)                                        | HOMO→LUMO+3(0.65)   | L1(π)→L1(π*)/Ru(dπ)                 |
| 267 (93000)                                                                                                             | 305 (0.02)                                        | HOMO-8→LUMO(0.42)   | Ru(dπ)→L1(π*)                       |
|                                                                                                                         | 301 (0.01)                                        | HOMO-1→LUMO+3(0.46) | Ru(dπ)/PPh <sub>3</sub> (π)→L1(π*)  |
| <b>2<sup>+</sup> (S=0)</b>                                                                                              |                                                   |                     |                                     |
| 475 (23000)                                                                                                             | 478 (0.30)                                        | HOMO→LUMO(0.67)     | L2'(π)/Ru(dπ)→L2'(π*)               |
| 399 (18000)                                                                                                             | 389 (0.20)                                        | HOMO→LUMO+1(0.58)   | L2'(π)/Ru(dπ)→L2'(π*)               |
| 275 (51000)                                                                                                             | 283 (0.01)                                        | HOMO-2→LUMO+3(0.14) | Ru(dπ)→L2'(π*)                      |
| <b>3<sup>+</sup> (S=0)</b>                                                                                              |                                                   |                     |                                     |
| 419 (30000)                                                                                                             | 414 (0.01)                                        | HOMO-2→LUMO(0.64)   | Ru(dπ)/L3'(π)→L3'(π*)               |
|                                                                                                                         | 391 (0.10)                                        | HOMO-1→LUMO(0.52)   | Ru(dπ)/PPh <sub>3</sub> (π)→L3'(π*) |
| 325 (31000)                                                                                                             | 329 (0.08)                                        | HOMO→LUMO+1(0.48)   | PPh <sub>3</sub> (π)/L3'(π)→L3'(π*) |

<sup>a</sup>Experimental absorption maxima from spectroelectrochemistry in CH<sub>3</sub>CN/0.1 M Et<sub>4</sub>NCIO<sub>4</sub>.

<sup>b</sup>Molar extinction coefficients in dm<sup>3</sup>mol<sup>-1</sup>cm<sup>-1</sup>. <sup>c</sup>Calculated oscillator strengths.

**Table S8** Electrochemical data<sup>a</sup>

| Complex                             | $E_{298}^{\circ}/[\text{V}](\Delta E_p/[\text{mV}])^b$ |                    |                    |
|-------------------------------------|--------------------------------------------------------|--------------------|--------------------|
|                                     | O1                                                     | R1                 | R2                 |
| [1](ClO <sub>4</sub> ) <sub>2</sub> | 1.31 <sup>c</sup>                                      | -1.09 <sup>c</sup> | -1.40 <sup>c</sup> |
| [2]ClO <sub>4</sub>                 | 1.26 <sup>c</sup>                                      | -1.03 <sup>c</sup> | -                  |
| [3]ClO <sub>4</sub>                 | 1.05 <sup>c</sup>                                      | -0.78 <sup>c</sup> | -1.07 <sup>c</sup> |

<sup>a</sup>From cyclic voltammetry in CH<sub>3</sub>CN/0.1 M Et<sub>4</sub>NClO<sub>4</sub> at 100 mVs<sup>-1</sup>. <sup>b</sup>Peak potentials in V versus SCE. <sup>c</sup>Irreversible.

**Table S9** DFT calculated MO compositions for  $\mathbf{1}^{3+}$  in  $S = 1/2$  state

| MO           | Energy (eV) | % Composition |    |                  |    |    |    |
|--------------|-------------|---------------|----|------------------|----|----|----|
|              |             | Ru            | L1 | PPh <sub>3</sub> | CO | Cl | H  |
| $\alpha$ -MO |             |               |    |                  |    |    |    |
| LUMO+5       | -8.373      | 17            | 61 | 18               | 01 | 03 | 00 |
| LUMO+4       | -8.517      | 27            | 46 | 23               | 01 | 04 | 00 |
| LUMO+3       | -9.108      | 02            | 94 | 03               | 00 | 00 | 00 |
| LUMO+2       | -9.249      | 02            | 95 | 02               | 00 | 00 | 00 |
| LUMO+1       | -9.345      | 08            | 85 | 03               | 01 | 03 | 00 |
| LUMO         | -9.481      | 06            | 89 | 04               | 01 | 00 | 01 |
| SOMO         | -12.775     | 03            | 01 | 96               | 00 | 00 | 00 |
| HOMO-1       | -12.920     | 56            | 06 | 34               | 01 | 03 | 00 |
| HOMO-2       | -13.027     | 26            | 05 | 63               | 00 | 05 | 00 |
| HOMO-3       | -13.068     | 07            | 03 | 87               | 00 | 03 | 00 |
| HOMO-4       | -13.142     | 03            | 59 | 37               | 01 | 00 | 00 |
| HOMO-5       | -13.171     | 06            | 02 | 92               | 02 | 00 | 00 |
| $\beta$ -MO  |             |               |    |                  |    |    |    |
| LUMO+5       | -8.477      | 28            | 42 | 25               | 01 | 05 | 00 |
| LUMO+4       | -8.968      | 02            | 94 | 04               | 00 | 00 | 00 |
| LUMO+3       | -9.078      | 02            | 95 | 03               | 00 | 00 | 00 |
| LUMO+2       | -9.225      | 09            | 83 | 04               | 01 | 03 | 00 |
| LUMO+1       | -9.376      | 06            | 88 | 04               | 01 | 00 | 01 |
| LUMO         | -12.181     | 03            | 83 | 12               | 00 | 01 | 00 |
| HOMO         | -12.567     | 01            | 14 | 85               | 00 | 00 | 00 |
| HOMO-1       | -12.900     | 62            | 07 | 28               | 01 | 02 | 01 |
| HOMO-2       | -13.015     | 23            | 04 | 66               | 00 | 06 | 00 |
| HOMO-3       | -13.058     | 06            | 04 | 88               | 00 | 02 | 00 |
| HOMO-4       | -13.156     | 06            | 02 | 92               | 00 | 00 | 00 |
| HOMO-5       | -13.169     | 12            | 12 | 72               | 00 | 03 | 00 |

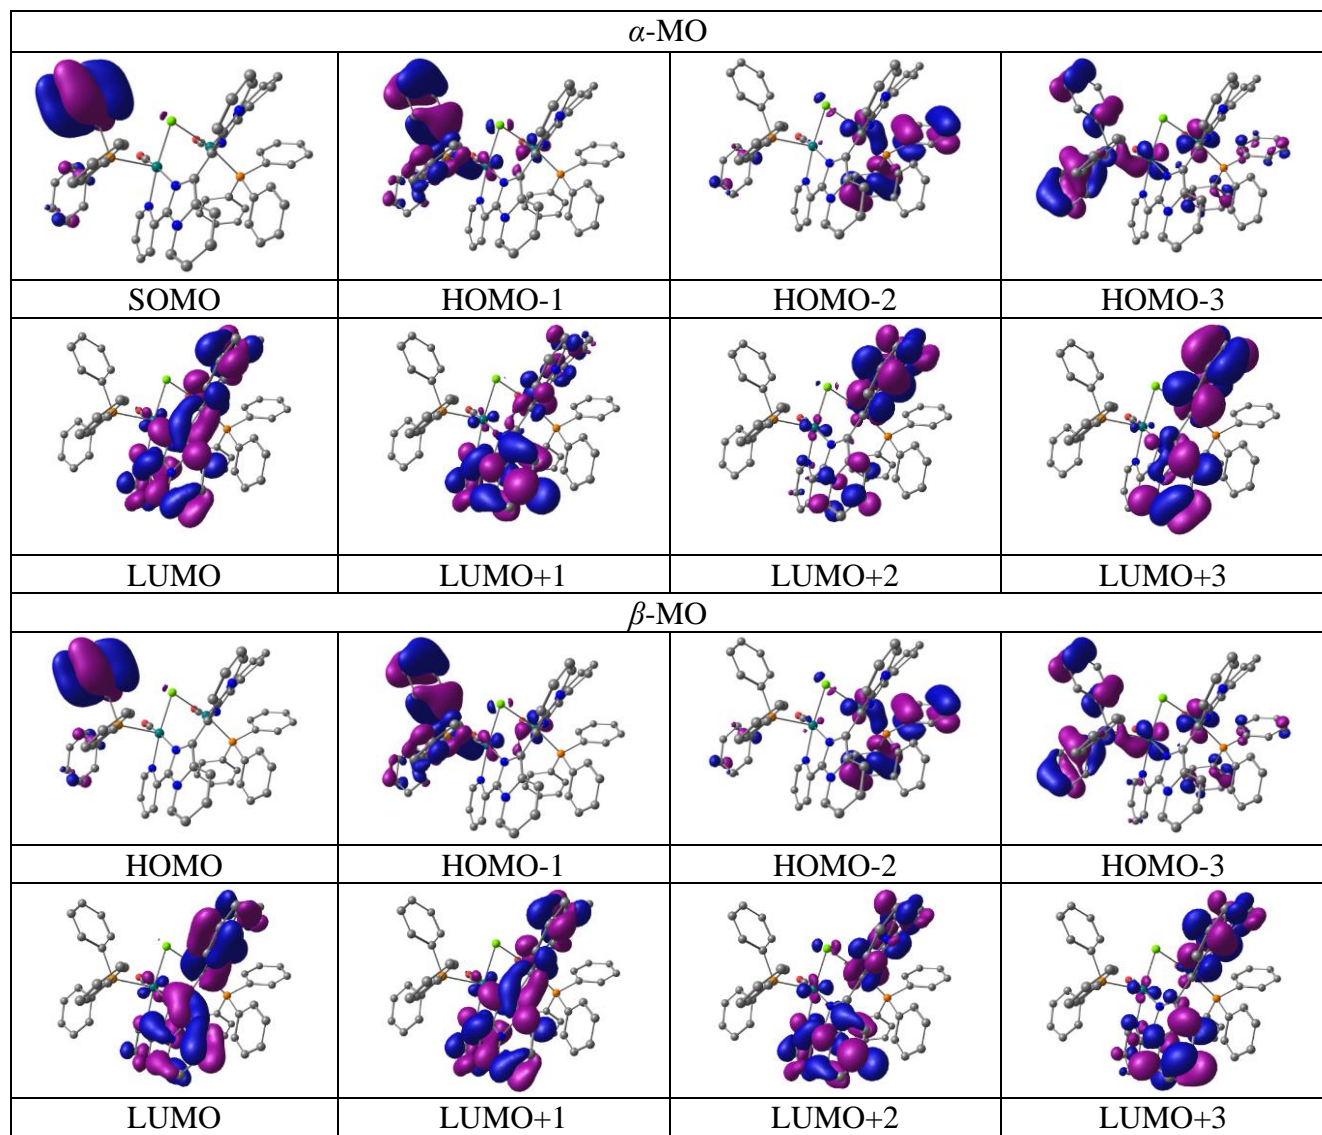

**Table S10** DFT calculated MO compositions for  $\mathbf{1}^{2+}$  in  $S = 0$  state

| MO     | Energy (eV) | % Composition |    |                  |    |    |    |
|--------|-------------|---------------|----|------------------|----|----|----|
|        |             | Ru            | L1 | PPh <sub>3</sub> | CO | Cl | H  |
| LUMO+5 | -5.664      | 04            | 91 | 05               | 01 | 00 | 00 |
| LUMO+4 | -5.976      | 08            | 84 | 07               | 00 | 01 | 00 |
| LUMO+3 | -6.145      | 20            | 64 | 13               | 00 | 03 | 00 |
| LUMO+2 | -6.242      | 12            | 79 | 07               | 01 | 01 | 00 |
| LUMO+1 | -6.503      | 24            | 58 | 11               | 01 | 05 | 00 |
| LUMO   | -6.548      | 14            | 80 | 03               | 02 | 01 | 01 |
| HOMO   | -9.726      | 02            | 97 | 01               | 00 | 00 | 00 |
| HOMO-1 | -10.285     | 35            | 04 | 59               | 00 | 01 | 00 |
| HOMO-2 | -10.334     | 52            | 06 | 40               | 00 | 02 | 00 |
| HOMO-3 | -10.496     | 22            | 05 | 64               | 00 | 08 | 00 |
| HOMO-4 | -10.590     | 07            | 04 | 87               | 01 | 00 | 00 |
| HOMO-5 | -10.666     | 20            | 28 | 44               | 02 | 06 | 01 |

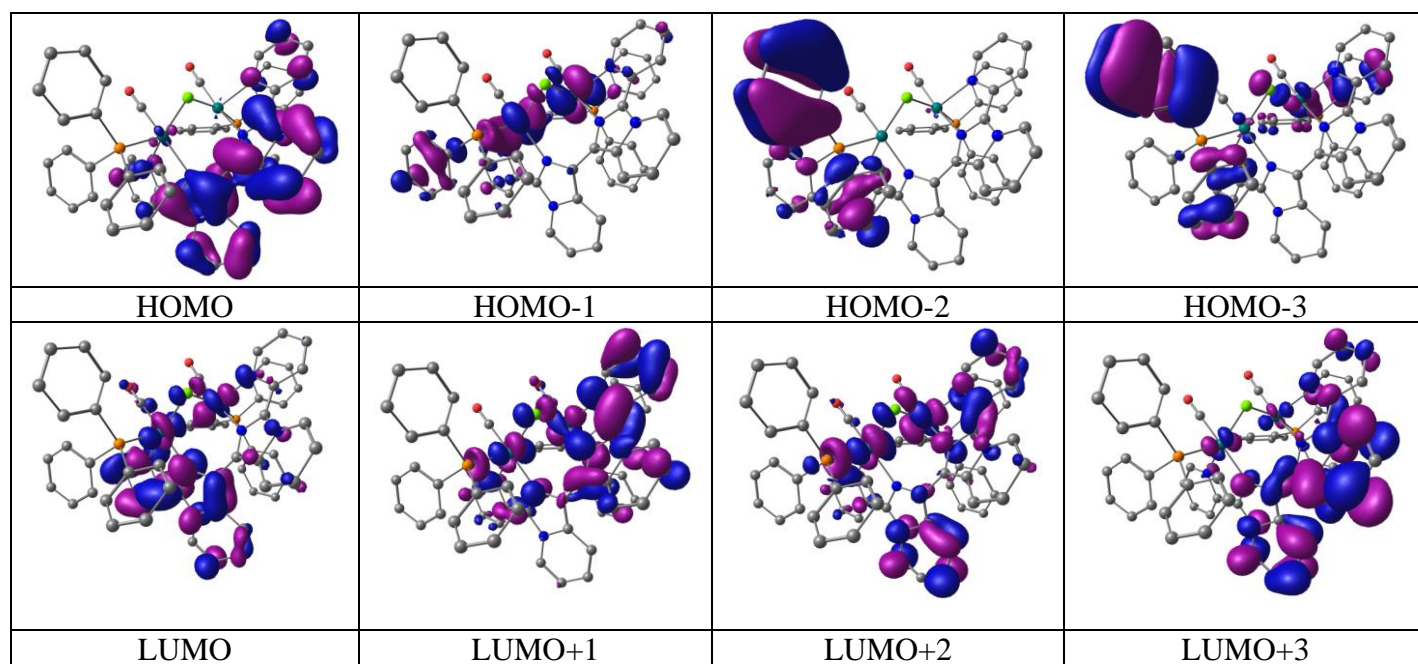



**Table S11** DFT calculated MO compositions for **1**<sup>+</sup> in *S* = 1/2 state

| MO           | Energy (eV) | % Composition |    |                  |    |    |    |
|--------------|-------------|---------------|----|------------------|----|----|----|
|              |             | Ru            | L1 | PPh <sub>3</sub> | CO | Cl | H  |
| <i>α</i> -MO |             |               |    |                  |    |    |    |
| LUMO+5       | -3.065      | 07            | 80 | 11               | 01 | 01 | 00 |
| LUMO+4       | -3.213      | 15            | 64 | 16               | 01 | 04 | 00 |
| LUMO+3       | -3.624      | 04            | 91 | 05               | 00 | 00 | 00 |
| LUMO+2       | -3.746      | 02            | 97 | 01               | 00 | 00 | 00 |
| LUMO+1       | -3.842      | 14            | 72 | 12               | 00 | 01 | 00 |
| LUMO         | -4.039      | 08            | 85 | 05               | 01 | 01 | 01 |
| SOMO         | -5.127      | 47            | 28 | 17               | 02 | 06 | 00 |
| HOMO-1       | -7.403      | 70            | 21 | 05               | 00 | 03 | 00 |
| HOMO-2       | -7.549      | 21            | 75 | 03               | 00 | 01 | 00 |
| HOMO-3       | -7.954      | 58            | 11 | 12               | 02 | 17 | 00 |
| HOMO-4       | -8.023      | 54            | 11 | 07               | 05 | 21 | 01 |
| HOMO-5       | -8.136      | 75            | 07 | 06               | 02 | 10 | 00 |
| <i>β</i> -MO |             |               |    |                  |    |    |    |
| LUMO+5       | -3.099      | 15            | 74 | 09               | 01 | 01 | 00 |
| LUMO+4       | -3.305      | 31            | 34 | 30               | 01 | 04 | 00 |
| LUMO+3       | -3.640      | 03            | 94 | 02               | 01 | 00 | 00 |
| LUMO+2       | -3.723      | 02            | 97 | 01               | 00 | 00 | 00 |
| LUMO+1       | -3.915      | 06            | 88 | 03               | 01 | 00 | 01 |
| LUMO         | -3.954      | 10            | 84 | 03               | 01 | 02 | 00 |
| HOMO         | -7.292      | 74            | 17 | 06               | 00 | 03 | 00 |
| HOMO-1       | -7.497      | 18            | 78 | 02               | 00 | 01 | 00 |
| HOMO-2       | -7.820      | 61            | 12 | 08               | 03 | 16 | 00 |
| HOMO-3       | -7.916      | 57            | 12 | 06               | 06 | 19 | 00 |
| HOMO-4       | -8.005      | 78            | 06 | 04               | 11 | 01 | 00 |
| HOMO-5       | -8.198      | 34            | 44 | 12               | 05 | 05 | 01 |

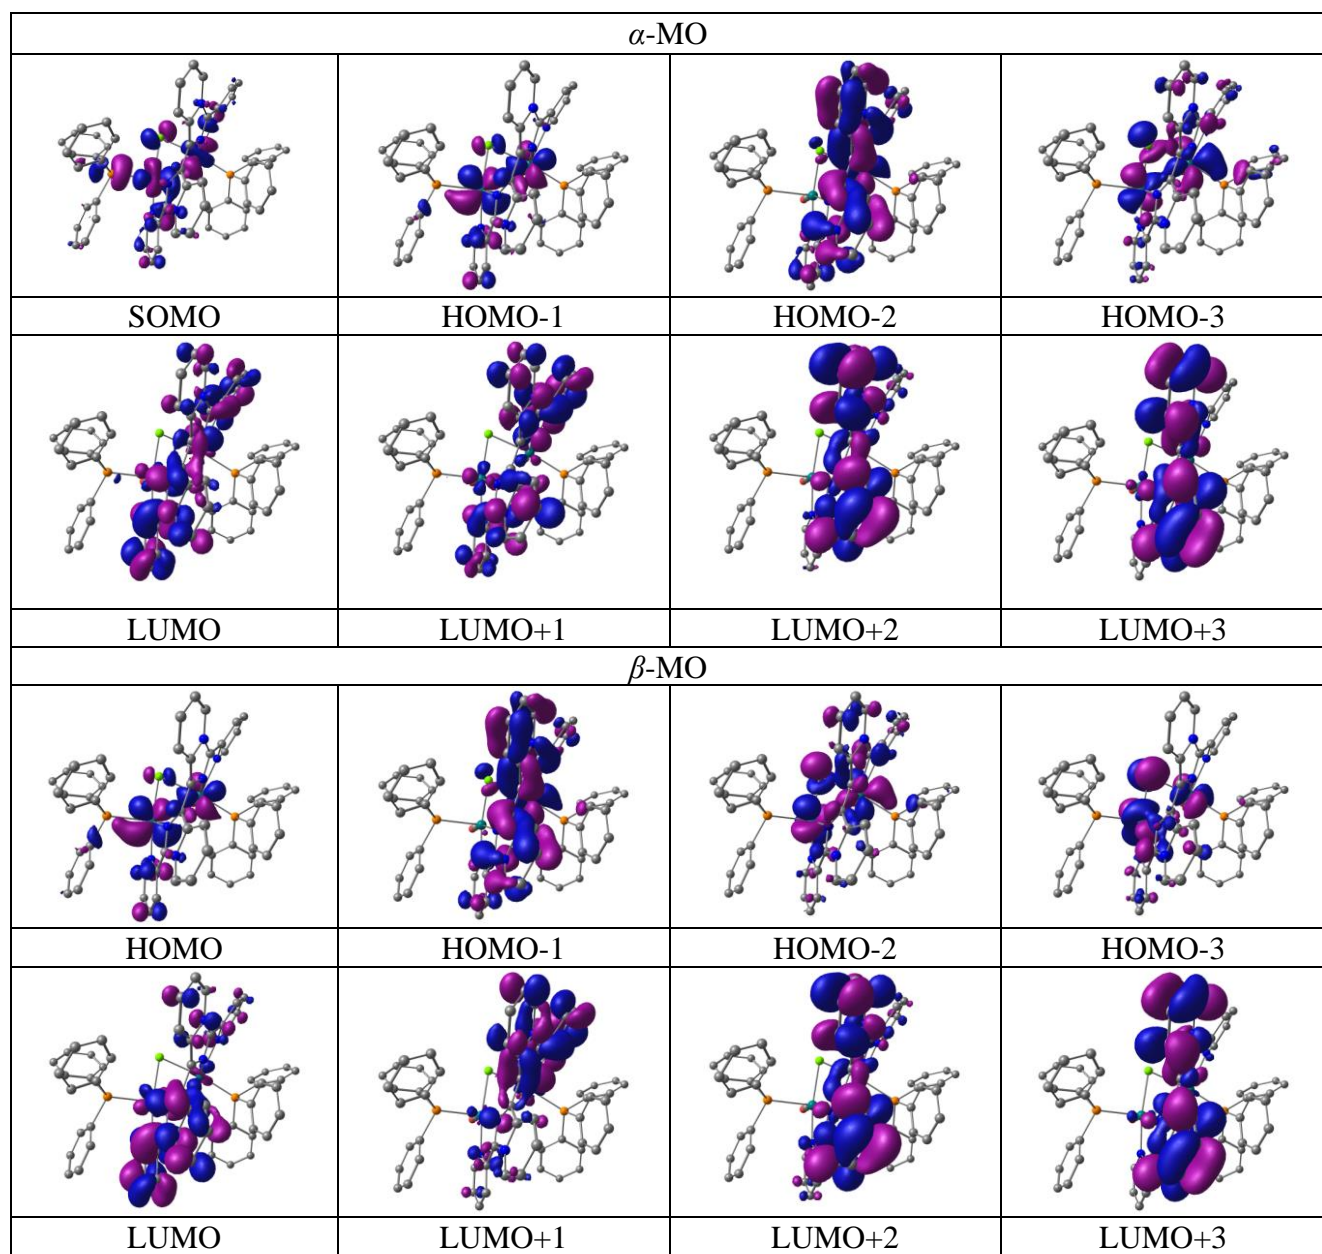

**Table S12** DFT calculated MO compositions for **1** in  $S = 1$  state

| MO                            | Energy (eV) | % Composition |    |                  |    |    |    |
|-------------------------------|-------------|---------------|----|------------------|----|----|----|
|                               |             | Ru            | L1 | PPh <sub>3</sub> | CO | Cl | H  |
| <i><math>\alpha</math>-MO</i> |             |               |    |                  |    |    |    |
| LUMO+5                        | -0.309      | 06            | 03 | 89               | 02 | 00 | 00 |
| LUMO+4                        | -0.369      | 02            | 06 | 90               | 01 | 00 | 00 |
| LUMO+3                        | -0.445      | 35            | 10 | 53               | 01 | 01 | 00 |
| LUMO+2                        | -0.750      | 12            | 67 | 20               | 00 | 01 | 00 |
| LUMO+1                        | -0.900      | 27            | 29 | 39               | 01 | 04 | 00 |
| LUMO                          | -0.934      | 02            | 93 | 04               | 01 | 00 | 00 |
| SOMO                          | -1.948      | 14            | 70 | 10               | 01 | 04 | 00 |
| HOMO-1                        | -2.007      | 10            | 82 | 06               | 01 | 01 | 01 |
| HOMO-2                        | -4.584      | 02            | 95 | 03               | 00 | 01 | 00 |
| HOMO-3                        | -5.054      | 74            | 14 | 09               | 01 | 03 | 00 |
| HOMO-4                        | -5.378      | 26            | 56 | 08               | 02 | 08 | 00 |
| HOMO-5                        | -5.545      | 46            | 22 | 02               | 05 | 25 | 00 |
| <i><math>\beta</math>-MO</i>  |             |               |    |                  |    |    |    |
| LUMO+5                        | -0.359      | 03            | 06 | 90               | 01 | 00 | 00 |
| LUMO+4                        | -0.507      | 24            | 44 | 31               | 01 | 00 | 00 |
| LUMO+3                        | -0.573      | 16            | 45 | 37               | 02 | 00 | 00 |
| LUMO+2                        | -0.678      | 09            | 73 | 16               | 00 | 01 | 00 |
| LUMO+1                        | -0.844      | 31            | 24 | 36               | 02 | 07 | 00 |
| LUMO                          | -0.861      | 03            | 91 | 05               | 01 | 01 | 00 |
| HOMO                          | -4.364      | 01            | 96 | 03               | 00 | 00 | 00 |
| HOMO-1                        | -4.935      | 67            | 22 | 08               | 01 | 02 | 00 |
| HOMO-2                        | -5.198      | 25            | 64 | 08               | 01 | 02 | 01 |
| HOMO-3                        | -5.474      | 51            | 13 | 04               | 05 | 27 | 00 |
| HOMO-4                        | -5.574      | 52            | 16 | 10               | 02 | 20 | 00 |
| HOMO-5                        | -5.666      | 75            | 09 | 05               | 11 | 20 | 00 |

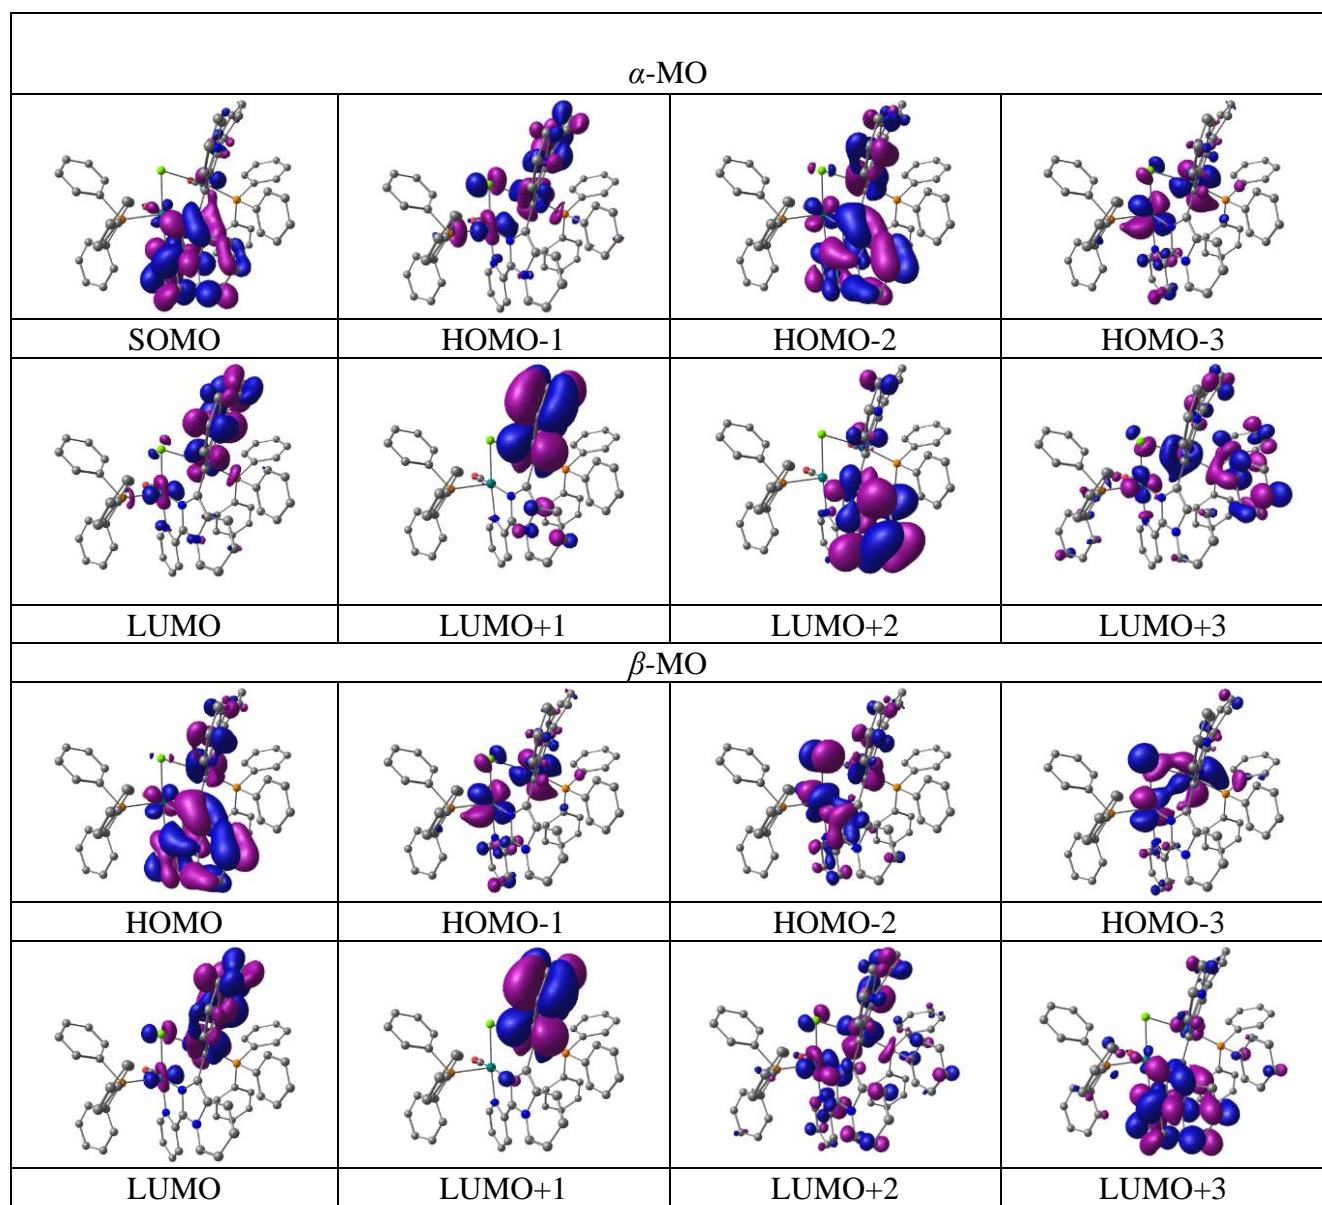

**Table S13** DFT-calculated MO compositions for  $2^{2+}$  in  $S = 1/2$  state

| MO           | Energy (eV) | % Composition |     |                  |    |    |
|--------------|-------------|---------------|-----|------------------|----|----|
|              |             | Ru            | L2' | PPh <sub>3</sub> | CO | H  |
| $\alpha$ -MO |             |               |     |                  |    |    |
| LUMO+5       | -5.734      | 05            | 86  | 07               | 01 | 00 |
| LUMO+4       | -5.816      | 06            | 77  | 16               | 01 | 00 |
| LUMO+3       | -5.816      | 06            | 77  | 16               | 01 | 00 |
| LUMO+2       | -5.861      | 30            | 11  | 55               | 01 | 02 |
| LUMO+1       | -6.279      | 02            | 95  | 03               | 01 | 00 |
| LUMO         | -7.594      | 04            | 89  | 07               | 00 | 00 |
| SOMO         | -10.790     | 00            | 01  | 99               | 00 | 00 |
| HOMO-1       | -10.833     | 07            | 17  | 76               | 00 | 00 |
| HOMO-2       | -10.955     | 01            | 08  | 91               | 00 | 00 |
| HOMO-3       | -10.993     | 03            | 59  | 38               | 00 | 00 |
| HOMO-4       | -11.055     | 02            | 09  | 88               | 01 | 00 |
| HOMO-5       | -11.166     | 01            | 07  | 92               | 00 | 00 |
| $\beta$ -MO  |             |               |     |                  |    |    |
| LUMO+5       | -5.667      | 03            | 91  | 06               | 00 | 00 |
| LUMO+4       | -5.768      | 30            | 10  | 58               | 01 | 02 |
| LUMO+3       | -5.801      | 03            | 87  | 08               | 01 | 00 |
| LUMO+2       | -6.188      | 02            | 95  | 03               | 01 | 00 |
| LUMO+1       | -7.498      | 07            | 84  | 10               | 00 | 00 |
| LUMO         | -9.585      | 45            | 33  | 21               | 00 | 00 |
| HOMO         | -10.790     | 00            | 01  | 99               | 00 | 00 |
| HOMO-1       | -10.827     | 06            | 36  | 57               | 00 | 00 |
| HOMO-2       | -10.950     | 02            | 04  | 94               | 00 | 00 |
| HOMO-3       | -11.014     | 29            | 24  | 47               | 00 | 00 |
| HOMO-4       | -11.048     | 08            | 02  | 90               | 00 | 00 |
| HOMO-5       | -11.154     | 01            | 03  | 96               | 00 | 00 |

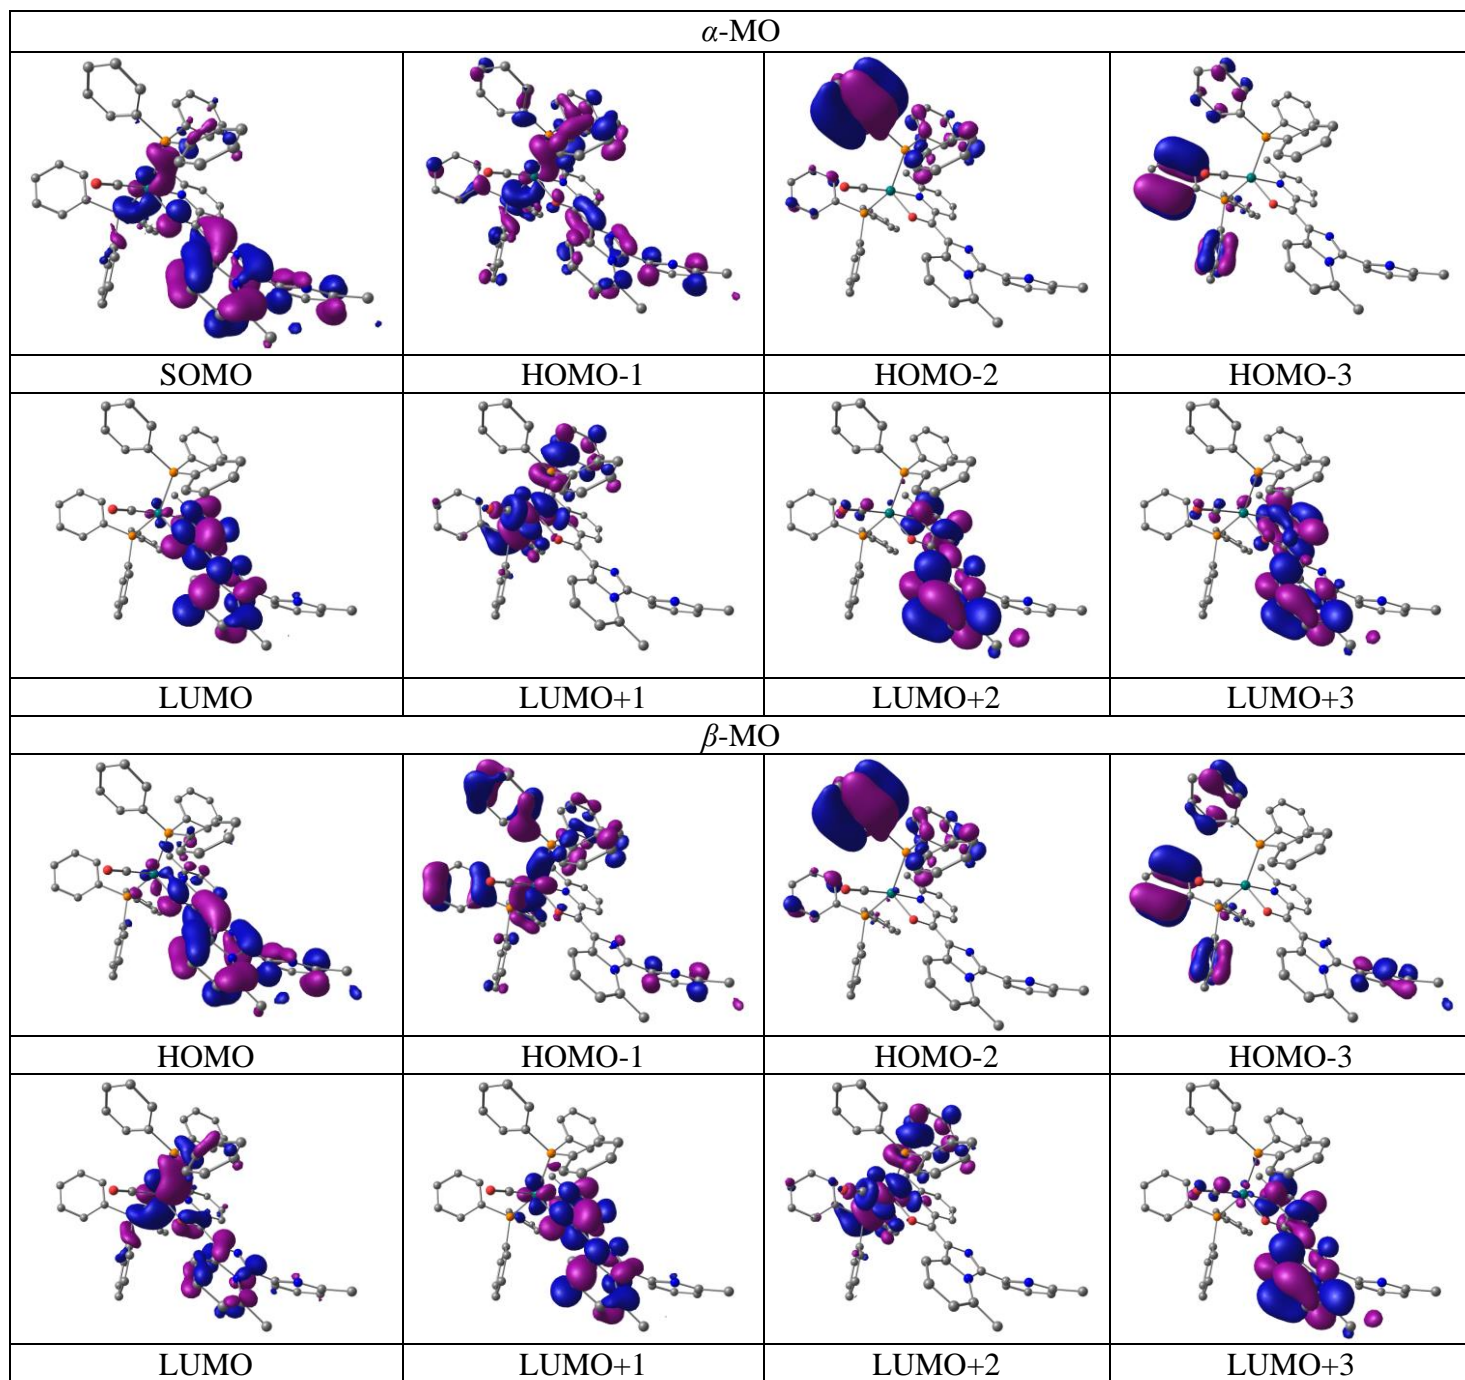

**Table S14** DFT-calculated MO compositions for  $2^+$  in  $S = 0$  state

| MO     | Energy (eV) | % Composition |     |                  |    |    |
|--------|-------------|---------------|-----|------------------|----|----|
|        |             | Ru            | L2' | PPh <sub>3</sub> | CO | H  |
| LUMO+5 | -2.662      | 01            | 85  | 14               | 00 | 00 |
| LUMO+4 | -2.944      | 26            | 05  | 67               | 01 | 00 |
| LUMO+3 | -3.094      | 01            | 92  | 06               | 01 | 00 |
| LUMO+2 | -3.251      | 00            | 99  | 00               | 01 | 00 |
| LUMO+1 | -3.433      | 02            | 94  | 03               | 01 | 00 |
| LUMO   | -4.652      | 05            | 86  | 09               | 00 | 00 |
| HOMO   | -7.676      | 35            | 45  | 19               | 00 | 00 |
| HOMO-1 | -8.213      | 10            | 24  | 66               | 01 | 00 |
| HOMO-2 | -8.310      | 72            | 11  | 06               | 10 | 00 |
| HOMO-3 | -8.353      | 61            | 20  | 18               | 02 | 00 |
| HOMO-4 | -8.556      | 04            | 02  | 93               | 00 | 00 |
| HOMO-5 | -8.587      | 16            | 06  | 77               | 01 | 00 |

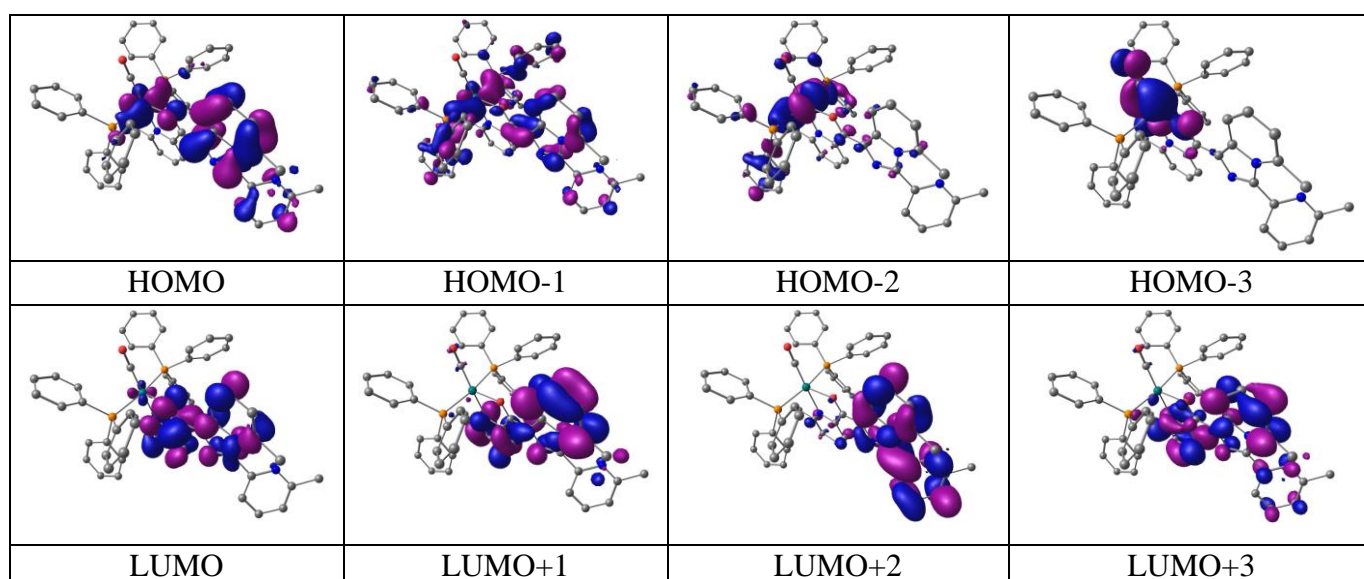

**Table S15** DFT-calculated MO compositions for **2** in  $S = 1/2$  state

| MO           | Energy (eV) | % Composition |     |                  |    |    |
|--------------|-------------|---------------|-----|------------------|----|----|
|              |             | Ru            | L2' | PPh <sub>3</sub> | CO | H  |
| $\alpha$ -MO |             |               |     |                  |    |    |
| LUMO+5       | -0.235      | 04            | 04  | 91               | 01 | 00 |
| LUMO+4       | -0.285      | 03            | 81  | 16               | 01 | 00 |
| LUMO+3       | -0.353      | 11            | 04  | 84               | 01 | 00 |
| LUMO+2       | -0.404      | 02            | 06  | 91               | 02 | 00 |
| LUMO+1       | -0.524      | 19            | 77  | 03               | 00 | 00 |
| LUMO         | -0.811      | 00            | 99  | 01               | 00 | 00 |
| SOMO         | -2.334      | 05            | 85  | 10               | 00 | 00 |
| HOMO-1       | -4.656      | 19            | 70  | 11               | 00 | 00 |
| HOMO-2       | -5.356      | 56            | 27  | 07               | 08 | 01 |
| HOMO-3       | -5.441      | 60            | 21  | 17               | 03 | 00 |
| HOMO-4       | -5.702      | 44            | 06  | 47               | 02 | 00 |
| HOMO-5       | -6.036      | 30            | 17  | 48               | 04 | 00 |
| $\beta$ -MO  |             |               |     |                  |    |    |
| LUMO+5       | -0.231      | 04            | 04  | 91               | 01 | 00 |
| LUMO+4       | -0.350      | 11            | 03  | 85               | 01 | 00 |
| LUMO+3       | -0.392      | 02            | 02  | 95               | 01 | 00 |
| LUMO+2       | -0.518      | 18            | 03  | 78               | 00 | 00 |
| LUMO+1       | -0.707      | 03            | 89  | 08               | 00 | 00 |
| LUMO         | -0.901      | 04            | 86  | 09               | 00 | 00 |
| HOMO         | -4.472      | 16            | 75  | 09               | 00 | 00 |
| HOMO-1       | -5.290      | 52            | 30  | 12               | 05 | 01 |
| HOMO-2       | -5.381      | 62            | 22  | 11               | 06 | 00 |
| HOMO-3       | -5.680      | 44            | 08  | 46               | 03 | 00 |
| HOMO-4       | -5.948      | 15            | 47  | 35               | 02 | 00 |
| HOMO-5       | -6.106      | 34            | 33  | 25               | 03 | 05 |



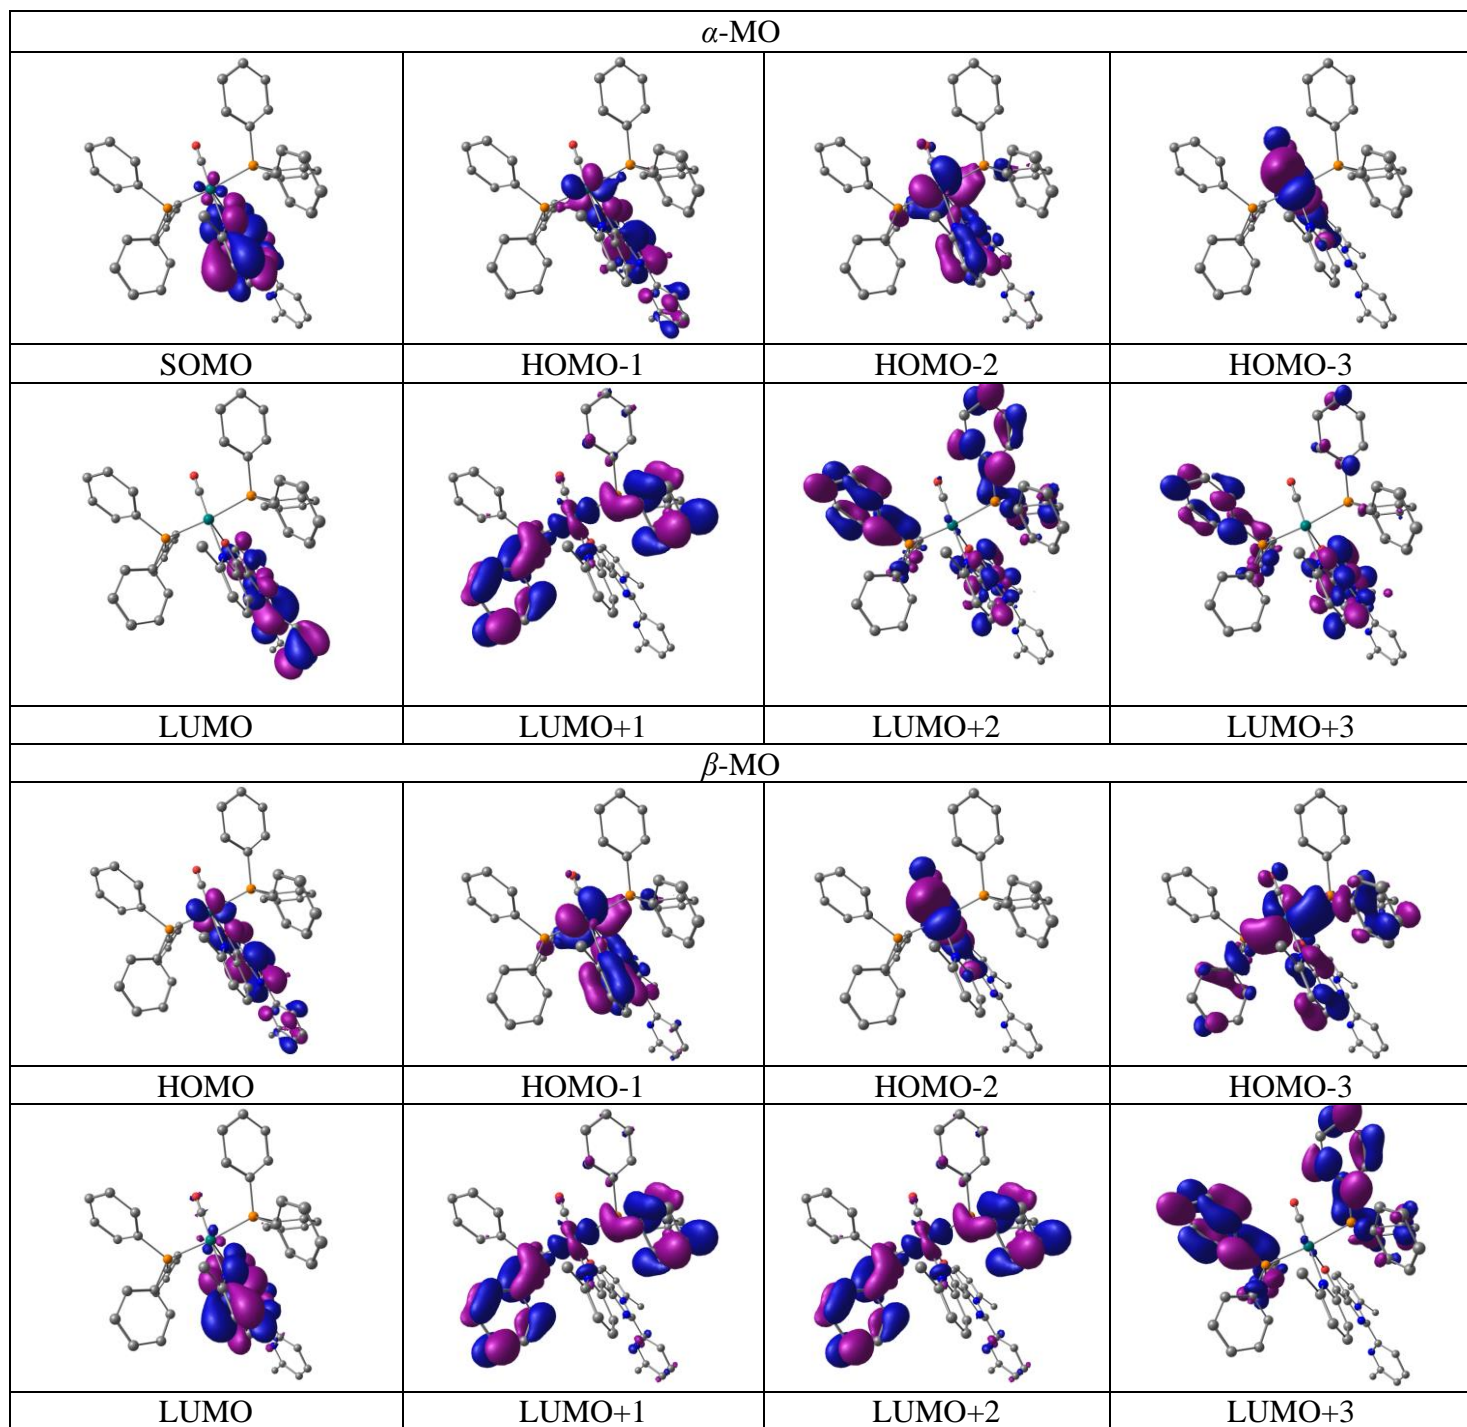

**Table S16** DFT-calculated MO compositions for  $\mathbf{3}^{2+}$  in  $S = 1/2$  state

| MO           | Energy (eV) | % Composition |     |                  |    |    |
|--------------|-------------|---------------|-----|------------------|----|----|
|              |             | Ru            | L3' | PPh <sub>3</sub> | CO | H  |
| $\alpha$ -MO |             |               |     |                  |    |    |
| LUMO+5       | -5.781      | 08            | 75  | 17               | 01 | 00 |
| LUMO+4       | -5.938      | 12            | 67  | 19               | 02 | 00 |
| LUMO+3       | -6.056      | 26            | 15  | 56               | 02 | 01 |
| LUMO+2       | -6.555      | 05            | 85  | 09               | 00 | 00 |
| LUMO+1       | -6.661      | 01            | 96  | 03               | 01 | 00 |
| LUMO         | -7.808      | 03            | 91  | 05               | 00 | 00 |
| SOMO         | -11.089     | 06            | 22  | 72               | 00 | 00 |
| HOMO-1       | -11.205     | 01            | 28  | 70               | 00 | 00 |
| HOMO-2       | -11.257     | 01            | 15  | 84               | 00 | 00 |
| HOMO-3       | -11.308     | 01            | 30  | 69               | 00 | 00 |
| HOMO-4       | -11.352     | 01            | 02  | 97               | 00 | 00 |
| HOMO-5       | -11.380     | 02            | 10  | 88               | 01 | 00 |
| $\beta$ -MO  |             |               |     |                  |    |    |
| LUMO+5       | -5.901      | 10            | 70  | 19               | 01 | 00 |
| LUMO+4       | -5.986      | 24            | 20  | 53               | 02 | 02 |
| LUMO+3       | -6.480      | 05            | 85  | 10               | 00 | 00 |
| LUMO+2       | -6.599      | 01            | 96  | 03               | 01 | 00 |
| LUMO+1       | -7.732      | 05            | 88  | 07               | 00 | 00 |
| LUMO         | -10.094     | 33            | 27  | 40               | 00 | 00 |
| HOMO         | -11.117     | 03            | 41  | 55               | 00 | 00 |
| HOMO-1       | -11.216     | 06            | 21  | 73               | 00 | 00 |
| HOMO-2       | -11.267     | 16            | 17  | 67               | 00 | 00 |
| HOMO-3       | -11.289     | 24            | 08  | 67               | 00 | 00 |
| HOMO-4       | -11.330     | 04            | 02  | 93               | 01 | 00 |
| HOMO-5       | -11.351     | 02            | 04  | 94               | 00 | 00 |

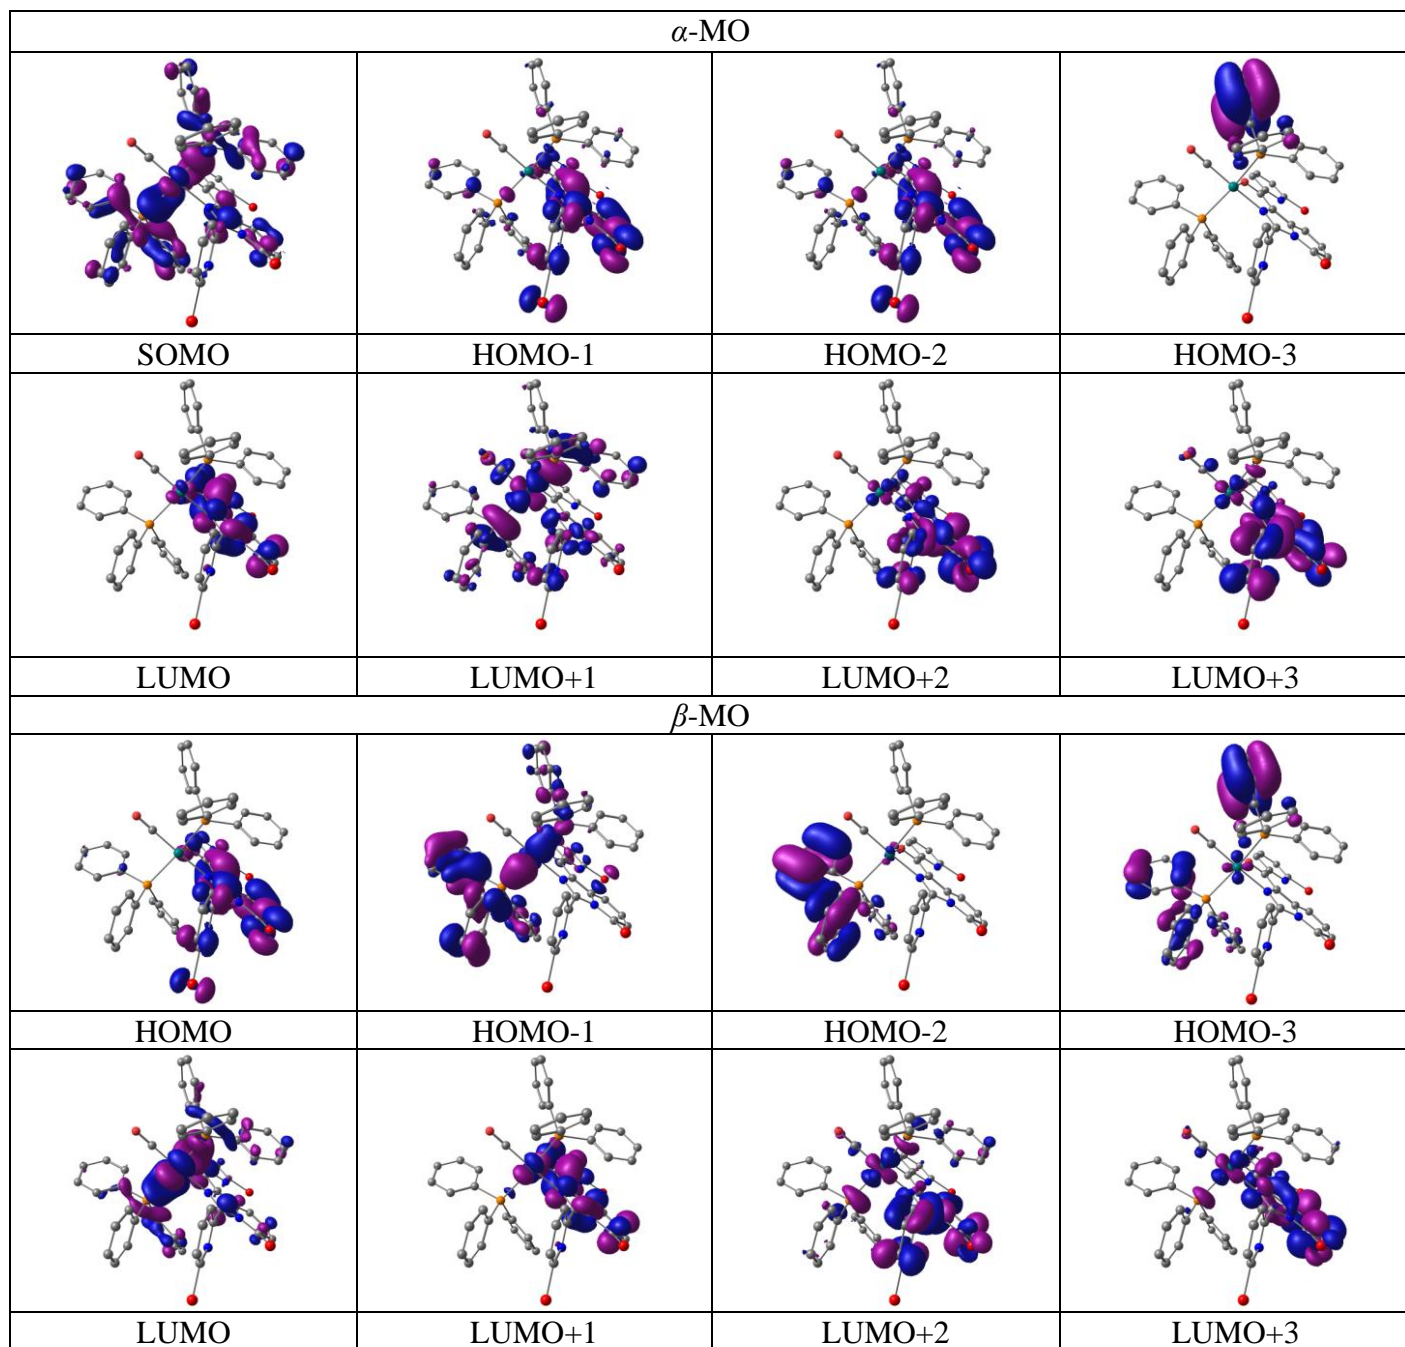

**Table S17** DFT-calculated MO compositions for **3<sup>+</sup>** in *S* = 0 state

| MO     | Energy (eV) | % Composition |     |                  |    |    |
|--------|-------------|---------------|-----|------------------|----|----|
|        |             | Ru            | L3' | PPh <sub>3</sub> | CO | H  |
| LUMO+5 | -3.101      | 23            | 10  | 66               | 01 | 00 |
| LUMO+4 | -3.308      | 05            | 79  | 15               | 01 | 00 |
| LUMO+3 | -3.477      | 01            | 96  | 03               | 00 | 00 |
| LUMO+2 | -3.825      | 03            | 89  | 07               | 00 | 00 |
| LUMO+1 | -3.950      | 01            | 97  | 02               | 00 | 00 |
| LUMO   | -5.036      | 04            | 90  | 06               | 00 | 00 |
| HOMO   | -8.165      | 27            | 30  | 42               | 00 | 00 |
| HOMO-1 | -8.518      | 33            | 16  | 50               | 01 | 00 |
| HOMO-2 | -8.574      | 50            | 36  | 11               | 03 | 00 |
| HOMO-3 | -8.704      | 60            | 17  | 13               | 10 | 00 |
| HOMO-4 | -8.752      | 08            | 04  | 87               | 01 | 00 |
| HOMO-5 | -8.836      | 12            | 03  | 84               | 01 | 00 |

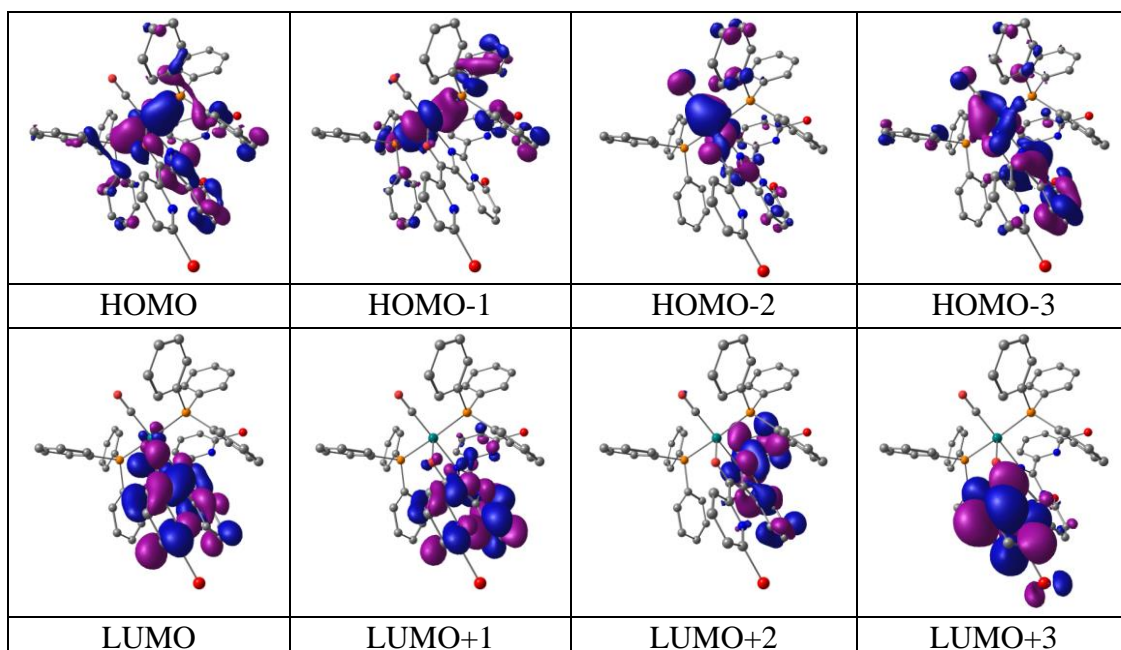

**Table S18** DFT-calculated MO compositions for **3** in  $S = 1/2$  state

| MO           | Energy (eV) | % Composition |     |                  |    |    |
|--------------|-------------|---------------|-----|------------------|----|----|
|              |             | Ru            | L3' | PPh <sub>3</sub> | CO | H  |
| $\alpha$ -MO |             |               |     |                  |    |    |
| LUMO+5       | -0.483      | 02            | 08  | 90               | 00 | 00 |
| LUMO+4       | -0.597      | 20            | 20  | 59               | 01 | 00 |
| LUMO+3       | -0.811      | 07            | 63  | 27               | 01 | 01 |
| LUMO+2       | -0.867      | 03            | 07  | 90               | 00 | 00 |
| LUMO+1       | -0.880      | 01            | 92  | 07               | 00 | 00 |
| LUMO         | -1.210      | 04            | 85  | 11               | 00 | 00 |
| SOMO         | -2.739      | 04            | 89  | 06               | 00 | 00 |
| HOMO-1       | -5.303      | 15            | 72  | 13               | 00 | 00 |
| HOMO-2       | -5.713      | 47            | 30  | 22               | 02 | 00 |
| HOMO-3       | -5.881      | 63            | 20  | 05               | 12 | 00 |
| HOMO-4       | -5.953      | 44            | 09  | 46               | 02 | 00 |
| HOMO-5       | -6.311      | 20            | 41  | 35               | 03 | 01 |
| $\beta$ -MO  |             |               |     |                  |    |    |
| LUMO+5       | -0.588      | 20            | 23  | 56               | 01 | 00 |
| LUMO+4       | -0.620      | 02            | 92  | 06               | 01 | 00 |
| LUMO+3       | -0.797      | 08            | 61  | 29               | 01 | 01 |
| LUMO+2       | -0.865      | 03            | 04  | 92               | 00 | 00 |
| LUMO+1       | -1.078      | 02            | 88  | 09               | 00 | 00 |
| LUMO         | -1.242      | 06            | 83  | 11               | 01 | 00 |
| HOMO         | -5.116      | 12            | 79  | 09               | 00 | 00 |
| HOMO-1       | -5.609      | 48            | 30  | 21               | 01 | 00 |
| HOMO-2       | -5.841      | 60            | 23  | 04               | 13 | 00 |
| HOMO-3       | -5.927      | 39            | 11  | 48               | 02 | 00 |
| HOMO-4       | -6.195      | 15            | 65  | 18               | 01 | 00 |
| HOMO-5       | -6.338      | 26            | 48  | 22               | 03 | 01 |

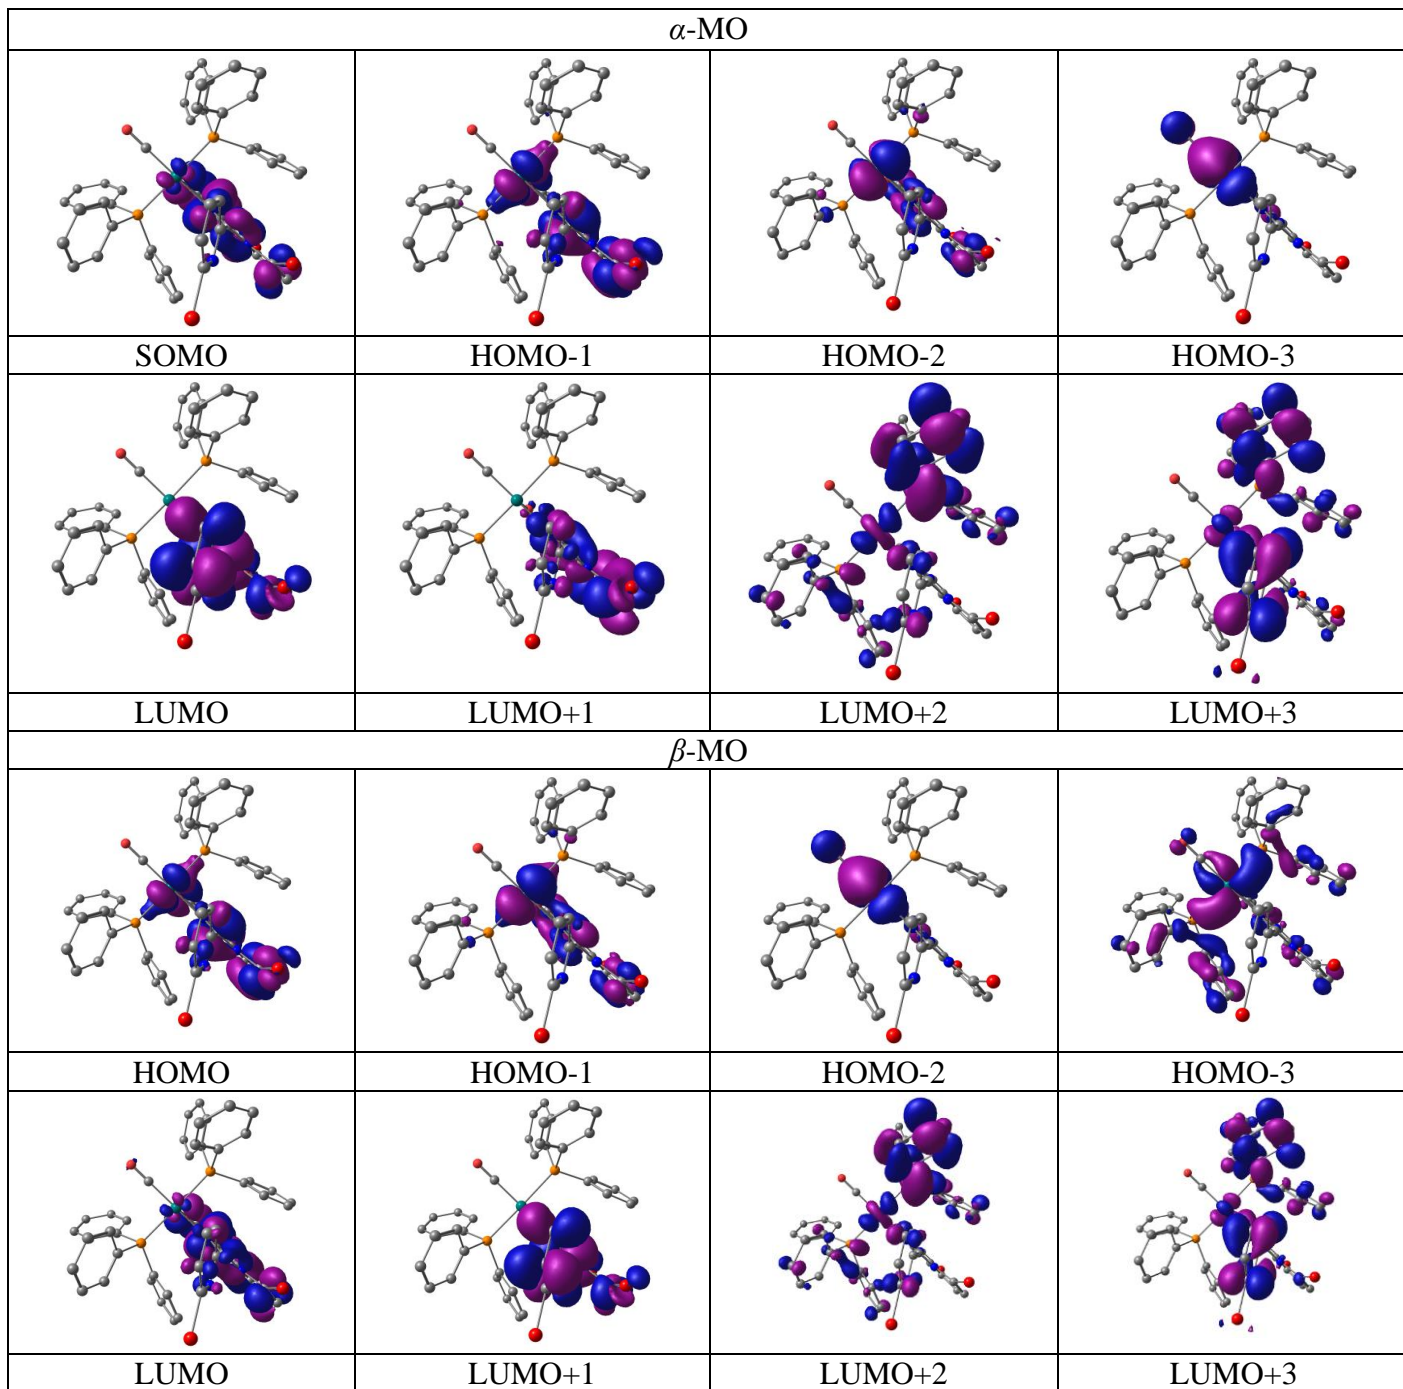

**Table S19** DFT-calculated MO compositions for  $\mathbf{3}^-$  in  $S = 1$  state

| MO           | Energy (eV) | % Composition |     |                  |    |    |
|--------------|-------------|---------------|-----|------------------|----|----|
|              |             | Ru            | L3' | PPh <sub>3</sub> | CO | H  |
| $\alpha$ -MO |             |               |     |                  |    |    |
| LUMO+5       | 2.012       | 10            | 02  | 86               | 01 | 00 |
| LUMO+4       | 1.922       | 06            | 15  | 79               | 00 | 00 |
| LUMO+3       | 1.865       | 05            | 06  | 88               | 00 | 00 |
| LUMO+2       | 1.699       | 07            | 32  | 60               | 01 | 00 |
| LUMO+1       | 1.644       | 08            | 55  | 35               | 01 | 00 |
| LUMO         | 1.403       | 01            | 16  | 82               | 00 | 00 |
| SOMO         | 0.943       | 11            | 50  | 39               | 00 | 00 |
| HOMO-1       | -0.273      | 04            | 90  | 06               | 00 | 00 |
| HOMO-2       | -2.619      | 11            | 80  | 09               | 00 | 00 |
| HOMO-3       | -3.170      | 63            | 19  | 16               | 02 | 00 |
| HOMO-4       | -3.326      | 68            | 16  | 04               | 12 | 00 |
| HOMO-5       | -3.388      | 36            | 17  | 45               | 03 | 00 |
| $\beta$ -MO  |             |               |     |                  |    |    |
| LUMO+5       | 1.975       | 03            | 22  | 75               | 00 | 00 |
| LUMO+4       | 1.911       | 02            | 65  | 31               | 01 | 00 |
| LUMO+3       | 1.868       | 10            | 09  | 81               | 00 | 00 |
| LUMO+2       | 1.703       | 16            | 04  | 78               | 01 | 00 |
| LUMO+1       | 1.567       | 03            | 03  | 94               | 01 | 00 |
| LUMO         | 1.368       | 04            | 87  | 09               | 01 | 00 |
| HOMO         | -2.379      | 08            | 85  | 07               | 00 | 00 |
| HOMO-1       | -3.051      | 63            | 20  | 17               | 01 | 00 |
| HOMO-2       | -3.274      | 65            | 19  | 03               | 13 | 00 |
| HOMO-3       | -3.324      | 34            | 26  | 37               | 03 | 00 |
| HOMO-4       | -3.541      | 08            | 71  | 18               | 02 | 00 |
| HOMO-5       | -3.796      | 25            | 30  | 39               | 05 | 00 |

$\alpha$ -MO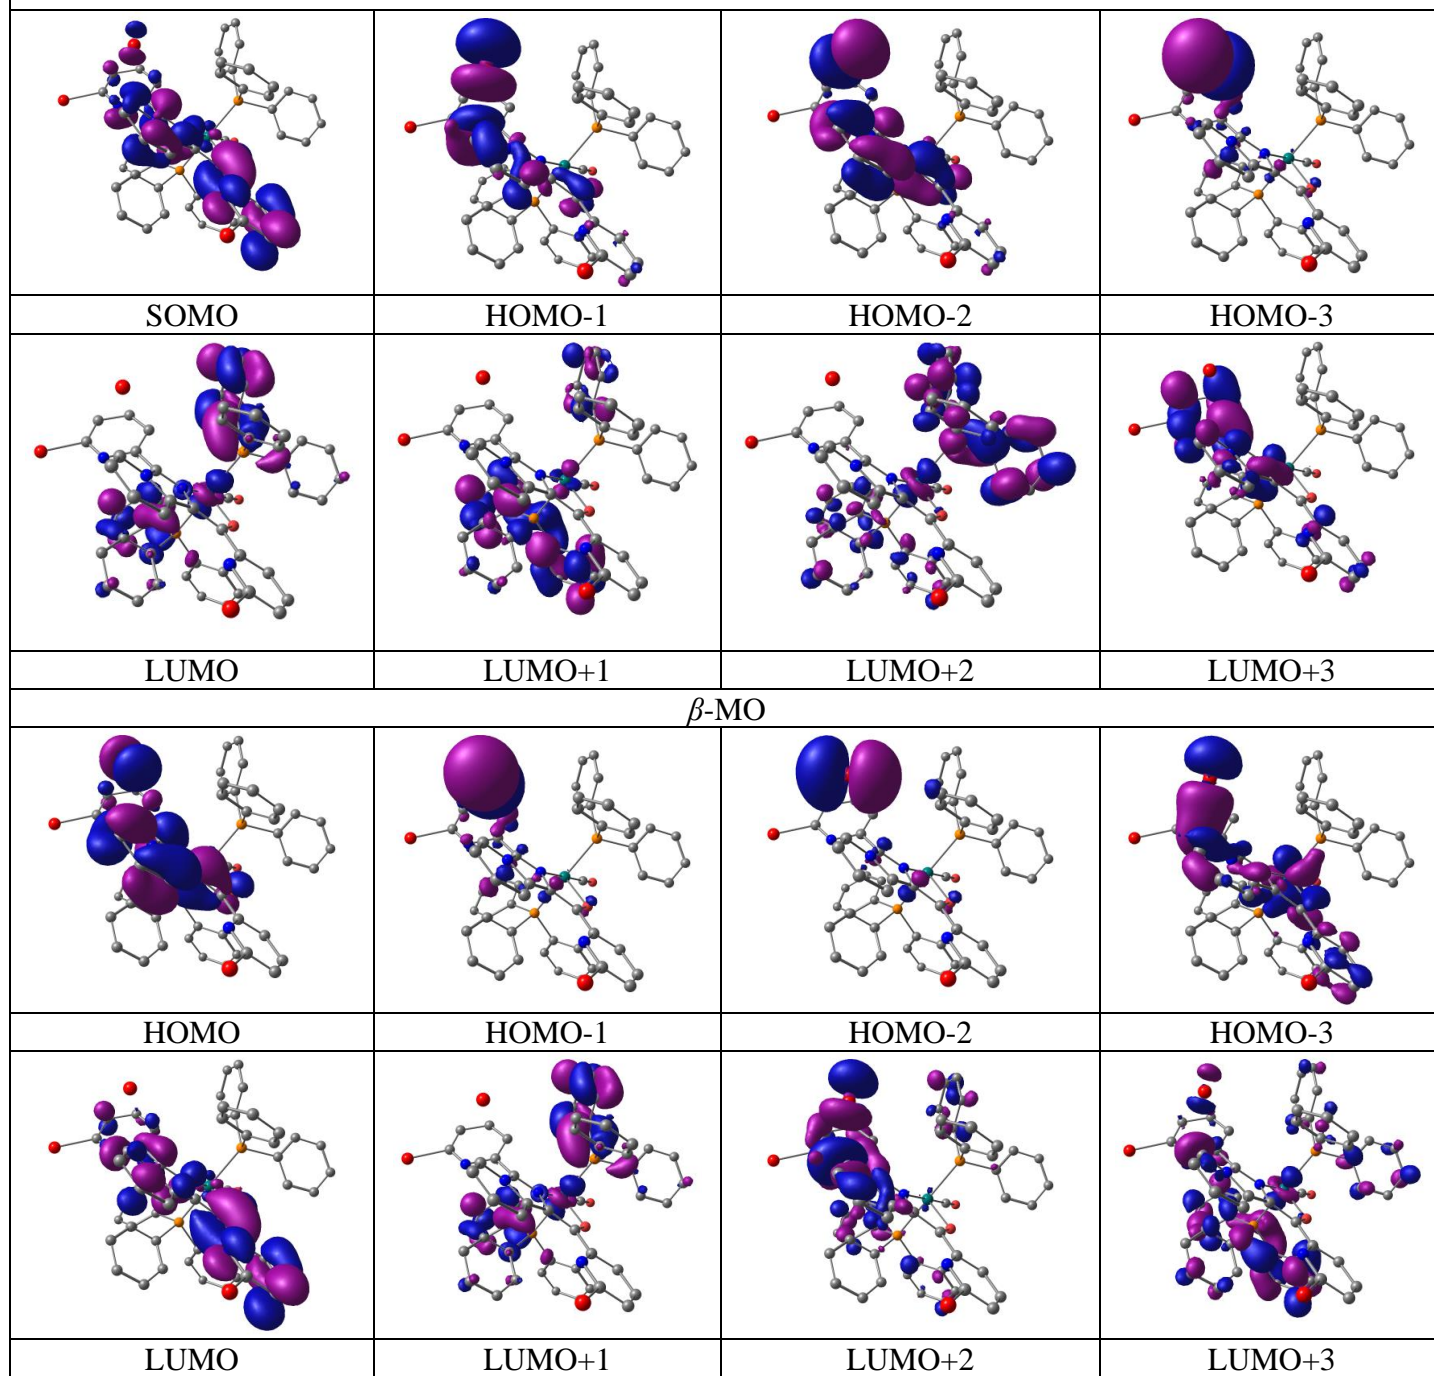



**Table S20** DFT calculated selected MO compositions

| Complex                                | MO                     | Fragments                                          | % Contribution       |
|----------------------------------------|------------------------|----------------------------------------------------|----------------------|
| <b>1<sup>3+</sup></b> ( <i>S</i> =1/2) | <i>β</i> -LUMO         | Ru/L1/PPh <sub>3</sub>                             | 03/83/12             |
| <b>1<sup>2+</sup></b> ( <i>S</i> =0)   | HOMO<br>LUMO           | Ru/L1/PPh <sub>3</sub><br>Ru/L1/PPh <sub>3</sub>   | 02/97/01<br>14/80/03 |
| <b>1<sup>+</sup></b> ( <i>S</i> =1/2)  | SOMO<br><i>β</i> -LUMO | Ru/L1/PPh <sub>3</sub><br>Ru/L1/PPh <sub>3</sub>   | 48/28/17<br>10/84/03 |
| <b>1</b> ( <i>S</i> =1)                | SOMO                   | Ru/L <sub>1</sub> /PPh <sub>3</sub>                | 14/70/10             |
| <b>2<sup>2+</sup></b> ( <i>S</i> =1/2) | <i>β</i> -LUMO         | Ru/L2'/PPh <sub>3</sub>                            | 45/33/21             |
| <b>2<sup>+</sup></b> ( <i>S</i> =0)    | HOMO<br>LUMO           | Ru/L2'/PPh <sub>3</sub><br>Ru/L2'/PPh <sub>3</sub> | 35/45/19<br>05/86/09 |
| <b>2</b> ( <i>S</i> =1/2)              | SOMO                   | Ru/L2'/PPh <sub>3</sub>                            | 05/85/10             |
| <b>3<sup>2+</sup></b> ( <i>S</i> =1/2) | <i>β</i> -<br>LUMO     | Ru/L3'/PPh <sub>3</sub>                            | 33/27/40             |
| <b>3<sup>+</sup></b> ( <i>S</i> =0)    | HOMO<br>LUMO           | Ru/L3'/PPh <sub>3</sub><br>Ru/L3'/PPh <sub>3</sub> | 27/30/42<br>04/90/06 |
| <b>3</b> ( <i>S</i> =1/2)              | SOMO<br><i>β</i> -LUMO | Ru/L3'/PPh <sub>3</sub><br>Ru/L3'/PPh <sub>3</sub> | 04/89/06<br>06/83/11 |
| <b>3<sup>-</sup></b> ( <i>S</i> =1)    | SOMO                   | Ru/L3'/PPh <sub>3</sub>                            | 11/50/39             |

**Table S21** DFT calculated (UB3LYP/LanL2DZ/6-31G\*) Mulliken spin densities

| Complex                                | Ru1/Ru2     | L1/L2'/L3' | PPh <sub>3</sub> | H      | CO     | Cl    |
|----------------------------------------|-------------|------------|------------------|--------|--------|-------|
| <b>1<sup>3+</sup></b> ( <i>S</i> =1/2) | 0.00/0.040  | 0.931      | 0.021            | 0.002  | -0.002 | 0.008 |
| <b>1<sup>+</sup></b> ( <i>S</i> =1/2)  | 0.444/0.311 | 0.186      | 0.101            | -0.061 | -0.014 | 0.033 |
| <b>1</b> ( <i>S</i> =1)                | 0.350/0.196 | 1.330      | 0.092            | -0.012 | 0.003  | 0.044 |
| <b>2<sup>2+</sup></b> ( <i>S</i> =1/2) | 0.606       | 0.157      | 0.278            | -0.016 | -0.025 | -     |
| <b>2</b> ( <i>S</i> =1/2)              | 0.004       | 0.992      | 0.008            | -0.002 | 0.002  | -     |
| <b>3<sup>2+</sup></b> ( <i>S</i> =1/2) | 0.620       | 0.083      | 0.339            | -0.016 | -0.026 | -     |
| <b>3</b> ( <i>S</i> =1/2)              | 0.007       | 0.982      | 0.012            | -0.002 | 0.001  | -     |
| <b>3<sup>-</sup></b> ( <i>S</i> =1)    | 0.005       | 1.984      | 0.011            | -0.002 | 0.002  | -     |

**Table S22** Comparison of TON of **[1](ClO<sub>4</sub>)<sub>2</sub>** with previously reported complexes

| Sr. No. | Complex                                                                                     | Potential                       | FE (%) | TON                             | Ref.      |
|---------|---------------------------------------------------------------------------------------------|---------------------------------|--------|---------------------------------|-----------|
| 1.      | [Fe(C <sub>5</sub> (p-C <sub>6</sub> H <sub>4</sub> Br) <sub>5</sub> )(CO) <sub>2</sub> Br] | -1.00 V vs Ag/AgCl              | -      | 25                              | 11        |
| 2.      | Ni( <sup>p-tbu</sup> dhbpy)                                                                 | -1.9 V vs Fc/Fc <sup>+</sup>    | 94     | 9.07                            | 12        |
| 3.      | [Cu(L <sub>1</sub> H <sub>2</sub> )(ClO <sub>4</sub> )]ClO <sub>4</sub>                     | -1.65 V vs Fc <sup>+</sup> /Fc  | 81     | 73.00                           | 13        |
| 4.      | [Ni(L <sup>1</sup> ) <sub>2</sub> ]                                                         | -1.50 V vs Fc/Fc <sup>+</sup>   | 67.56  | 23.95                           | 14        |
| 5.      | [Co(DO)(DOH)pnBr <sub>2</sub> ]                                                             | -0.78 V vs. Fc/0                | -      | 40                              | 15        |
| 6.      | [BzPy] <sub>2</sub> [Ni(tdas) <sub>2</sub> ]                                                | -1.10V vs Ag/Agcl               | -      | 2202.2                          | 16        |
| 7.      | Ni(abt) <sub>2</sub>                                                                        | -1.64 V vs SCE                  | ~80    | 6190                            | 17        |
| 8.      | [Cu <sub>2</sub> (TPy)]                                                                     | -1.16 V vs Fc <sup>+</sup> /Fc  | 96     | 102                             | 18        |
| 9.      | [Ni(L)]                                                                                     | -1.01 V vs. Fc <sup>+</sup> /Fc | 94     | 37                              | 19        |
| 10.     | [Ni(P <sup>Ph</sup> <sub>2</sub> N <sup>Ph</sup> ) <sub>2</sub> ] <sup>2+</sup>             | -1.13V vs Fc <sup>+</sup> /Fc   | 99     | 11                              | 20        |
| 11      | [Ru <sub>2</sub> (OTf)(μ-H)(Me <sub>2</sub> dad)(dbcot) <sub>2</sub> ] <sub>2</sub> @CC     | -300 mV vs RHE                  | 86     | 5.5 × 10 <sup>3</sup>           | 21        |
| 12      | Sb-Salen@CC                                                                                 | -1.4 V vs NHE                   | 96.8   | 43.4 s <sup>-1</sup><br>(TOF)   | 22        |
| 13      | Ni(DPMDA) <sub>2</sub> @CC                                                                  | -2.31 V vs Fc/Fc <sup>+</sup>   | -      | 25,900 s <sup>-1</sup><br>(TOF) | 23        |
| 14      | <b>[1](ClO<sub>4</sub>)<sub>2</sub></b>                                                     | 0.45 V vs RHE                   | 98.4   | <b>2.74 × 10<sup>5</sup></b>    | This work |

<sup>p-tbu</sup>dhbpy = 4-tert-butyl-2,2-[6-[6-(5-tert-butyl-2hydroxy-phenyl)-2-pyridyl]-2-pyridyl]

phenol

L<sub>1</sub>H<sub>2</sub> = diacetyl-bis(N-4-methyl-3-thiosemicarbazone)

HL<sup>1</sup> = 1-((4-hydroxybutylimino)methyl)naphthalen-2-ol

(DO)(DOH)<sub>pn</sub> = N<sup>2</sup>,N<sup>2'</sup>-propanediylbis(2,3-butandione 2-imine-3-oxime)

BzPy = benzyl pyridinium and tdas = 1,2,5-thiadiazole-3,4-dithiolate

(abt) = 2-aminobenzenethiolate

(TPy) = triply fused porphyrin

L = thiosemicarbazone

$P^{Ph}_2N^{Ph}$  = 1,3,6-triphenyl-1-aza-3,6-diphosphacycloheptane

DPMDA=2,2'-((diphenylmethylene)bis(1H-pyrrole-5,2-diyl))bis  
(methaneylylidene))bis(azaneylylidene))dianiline

**Table S23a** Optimised cartesian coordinates of N,O piconyl binding mode of [2]ClO<sub>4</sub> using (UB3LYP/LanL2DZ/6-31G\*).

Cartesian Coordinates

|    |              |              |             |
|----|--------------|--------------|-------------|
| Ru | 11.012298000 | 1.674960000  | 5.233533000 |
| P  | 10.720119000 | 1.159955000  | 2.859823000 |
| P  | 11.452119000 | 1.865989000  | 7.633887000 |
| O  | 9.683965000  | 3.464401000  | 5.145904000 |
| N  | 12.322466000 | 3.442484000  | 4.792994000 |
| O  | 9.023356000  | -0.505848000 | 5.877108000 |
| N  | 7.529251000  | 7.078216000  | 5.072270000 |
| C  | 11.684142000 | 4.652361000  | 4.741812000 |
| N  | 9.757273000  | 7.059686000  | 4.858558000 |
| C  | 10.200930000 | 4.595432000  | 4.965893000 |
| C  | 10.663964000 | -0.646604000 | 2.470545000 |
| C  | 7.934016000  | 5.734792000  | 5.101935000 |
| C  | 13.065890000 | 2.637048000  | 8.108303000 |
| C  | 11.477300000 | 0.238762000  | 8.513968000 |
| C  | 9.802865000  | 0.316517000  | 5.627496000 |
| C  | 10.208135000 | 2.850111000  | 8.581989000 |
| C  | 13.655531000 | 3.394605000  | 4.581397000 |
| C  | 8.867366000  | 2.811513000  | 8.167777000 |
| H  | 8.595594000  | 2.253482000  | 7.278648000 |
| C  | 13.249414000 | 4.022214000  | 7.951406000 |
| H  | 12.432233000 | 4.643464000  | 7.596987000 |
| C  | 12.030340000 | 1.801850000  | 1.724210000 |
| C  | 6.975137000  | 4.713878000  | 5.231302000 |
| H  | 7.314881000  | 3.688815000  | 5.215066000 |
| C  | 11.389652000 | -1.559623000 | 3.251553000 |
| H  | 11.948526000 | -1.203698000 | 4.110549000 |
| C  | 9.343976000  | 5.758866000  | 4.976141000 |
| C  | 9.935731000  | -1.126004000 | 1.368679000 |
| H  | 9.364307000  | -0.440473000 | 0.751643000 |
| C  | 11.390349000 | -2.919578000 | 2.936005000 |
| H  | 11.955419000 | -3.613936000 | 3.551590000 |
| C  | 9.140889000  | 1.785906000  | 2.126521000 |
| C  | 10.659990000 | -3.386468000 | 1.842467000 |
| H  | 10.653753000 | -4.445923000 | 1.602388000 |
| C  | 6.732295000  | 2.042018000  | 2.354992000 |
| H  | 5.830571000  | 1.920266000  | 2.948964000 |
| C  | 14.387163000 | 4.563048000  | 4.312131000 |
| H  | 15.456288000 | 4.484470000  | 4.147070000 |
| C  | 12.961487000 | 0.942297000  | 1.121139000 |
| H  | 12.895837000 | -0.128676000 | 1.280829000 |
| C  | 12.037457000 | -0.884136000 | 7.882490000 |
| H  | 12.413014000 | -0.797325000 | 6.868228000 |
| C  | 12.371270000 | 5.838128000  | 4.473988000 |

|   |              |              |              |
|---|--------------|--------------|--------------|
| H | 11.820736000 | 6.768042000  | 4.443565000  |
| C | 6.656897000  | 2.581089000  | 1.068775000  |
| H | 5.698041000  | 2.886070000  | 0.659211000  |
| N | 8.037391000  | 9.855642000  | 3.727529000  |
| C | 9.932812000  | -2.486498000 | 1.060670000  |
| H | 9.359191000  | -2.842556000 | 0.209570000  |
| C | 7.963805000  | 1.655261000  | 2.882744000  |
| H | 8.006342000  | 1.237944000  | 3.883270000  |
| C | 14.374910000 | 2.075415000  | 4.632403000  |
| H | 14.274681000 | 1.618288000  | 5.620149000  |
| H | 15.437953000 | 2.215839000  | 4.419065000  |
| H | 13.960765000 | 1.377985000  | 3.900098000  |
| C | 9.052569000  | 2.318957000  | 0.830760000  |
| H | 9.942292000  | 2.419163000  | 0.218725000  |
| C | 10.538874000 | 3.580918000  | 9.735860000  |
| H | 11.566786000 | 3.619437000  | 10.080850000 |
| C | 13.746677000 | 5.789578000  | 4.256865000  |
| H | 14.301913000 | 6.698924000  | 4.046352000  |
| C | 14.136092000 | 1.866186000  | 8.587275000  |
| H | 14.016095000 | 0.797415000  | 8.728932000  |
| C | 12.137095000 | 3.184127000  | 1.488677000  |
| H | 11.423221000 | 3.869951000  | 1.935320000  |
| C | 14.467715000 | 4.619057000  | 8.274265000  |
| H | 14.587303000 | 5.692880000  | 8.158786000  |
| C | 7.881165000  | 3.484604000  | 8.889680000  |
| H | 6.847944000  | 3.442932000  | 8.556689000  |
| C | 12.107950000 | -2.110145000 | 8.545147000  |
| H | 12.545301000 | -2.968533000 | 8.042856000  |
| C | 7.819309000  | 2.719353000  | 0.310154000  |
| H | 7.770343000  | 3.130823000  | -0.694198000 |
| C | 10.980049000 | 0.102010000  | 9.820028000  |
| H | 10.537892000 | 0.951483000  | 10.328932000 |
| C | 9.551085000  | 4.259208000  | 10.452370000 |
| H | 9.822995000  | 4.819151000  | 11.342863000 |
| C | 15.527870000 | 3.841785000  | 8.747827000  |
| H | 16.476132000 | 4.307526000  | 9.000830000  |
| C | 13.972028000 | 1.452695000  | 0.302236000  |
| H | 14.681118000 | 0.771711000  | -0.160086000 |
| C | 8.703727000  | 7.840500000  | 4.893543000  |
| C | 11.607530000 | -2.236296000 | 9.842169000  |
| H | 11.653468000 | -3.193185000 | 10.354337000 |
| C | 6.204196000  | 7.442389000  | 5.299759000  |
| C | 11.042207000 | -1.128601000 | 10.475525000 |
| H | 10.645988000 | -1.219347000 | 11.482978000 |
| C | 15.358543000 | 2.465710000  | 8.901447000  |
| H | 16.173736000 | 1.853636000  | 9.277067000  |
| C | 13.139913000 | 3.689572000  | 0.661817000  |
| H | 13.198324000 | 4.759259000  | 0.480326000  |
| C | 5.653246000  | 5.063239000  | 5.370037000  |

|   |              |              |              |
|---|--------------|--------------|--------------|
| H | 4.888898000  | 4.298358000  | 5.465303000  |
| C | 8.834185000  | 9.296502000  | 4.652341000  |
| C | 5.814856000  | 8.879851000  | 5.454219000  |
| H | 6.430927000  | 9.380653000  | 6.209950000  |
| H | 4.771098000  | 8.933755000  | 5.771443000  |
| H | 5.943417000  | 9.429010000  | 4.518246000  |
| C | 14.063034000 | 2.824799000  | 0.068113000  |
| H | 14.843896000 | 3.218608000  | -0.576328000 |
| C | 8.220776000  | 4.212439000  | 10.031571000 |
| H | 7.453009000  | 4.738058000  | 10.592527000 |
| C | 8.222355000  | 11.148308000 | 3.411639000  |
| C | 5.285027000  | 6.427760000  | 5.427536000  |
| H | 4.250261000  | 6.701816000  | 5.600000000  |
| C | 9.858063000  | 9.995743000  | 5.304476000  |
| H | 10.478051000 | 9.495295000  | 6.039713000  |
| C | 9.226827000  | 11.919298000 | 4.014218000  |
| H | 9.355037000  | 12.959682000 | 3.731630000  |
| C | 10.050235000 | 11.334631000 | 4.973572000  |
| H | 10.830964000 | 11.914640000 | 5.457502000  |
| C | 7.287170000  | 11.731940000 | 2.382418000  |
| H | 7.102471000  | 11.009066000 | 1.582627000  |
| H | 7.688601000  | 12.651595000 | 1.947227000  |
| H | 6.316660000  | 11.972927000 | 2.835624000  |
| H | 12.152709000 | 0.559987000  | 5.240175000  |

**Table S23b** Optimised cartesian coordinates of N(imidazopyridine)/O(piconyl) binding mode of [2]ClO<sub>4</sub> using (UB3LYP/LanL2DZ/6-31G\*).

| Cartesian Coordinates |              |              |              |
|-----------------------|--------------|--------------|--------------|
| Ru                    | 11.752422000 | 8.182362000  | 7.171009000  |
| P                     | 14.074988000 | 8.819467000  | 7.589326000  |
| P                     | 9.408770000  | 7.650283000  | 6.699941000  |
| O                     | 11.243822000 | 8.432411000  | 9.372131000  |
| O                     | 11.342603000 | 10.837880000 | 5.781144000  |
| N                     | 12.050243000 | 6.241080000  | 8.146007000  |
| N                     | 14.364768000 | 4.607011000  | 6.287367000  |
| N                     | 12.542498000 | 4.182828000  | 8.809735000  |
| N                     | 10.518245000 | 6.561854000  | 12.258065000 |
| C                     | 13.041214000 | 4.826787000  | 6.366275000  |
| C                     | 15.283202000 | 8.582349000  | 6.214731000  |
| C                     | 12.510240000 | 5.075736000  | 7.734920000  |
| C                     | 14.216988000 | 10.617906000 | 7.996814000  |
| C                     | 11.320936000 | 7.416321000  | 10.109540000 |
| C                     | 10.929942000 | 7.616972000  | 11.541233000 |
| C                     | 11.772142000 | 6.176897000  | 9.502793000  |
| C                     | 15.289858000 | 11.408062000 | 7.558660000  |
| H                     | 16.073177000 | 10.975988000 | 6.945323000  |
| C                     | 11.491955000 | 9.837167000  | 6.346193000  |
| C                     | 16.652790000 | 8.380603000  | 6.456557000  |
| H                     | 17.020875000 | 8.302194000  | 7.474295000  |
| C                     | 8.675990000  | 6.368075000  | 7.817920000  |
| C                     | 14.870329000 | 7.986414000  | 9.038209000  |
| C                     | 8.598899000  | 10.007719000 | 7.989187000  |
| H                     | 9.457591000  | 9.828310000  | 8.629244000  |
| C                     | 7.786131000  | 11.119063000 | 8.216195000  |
| H                     | 8.018444000  | 11.797813000 | 9.032306000  |
| C                     | 8.995775000  | 7.049313000  | 5.004126000  |
| C                     | 12.869223000 | 2.825879000  | 8.849967000  |
| C                     | 12.784287000 | 4.679104000  | 3.992382000  |
| H                     | 12.166858000 | 4.705986000  | 3.099275000  |
| C                     | 12.208746000 | 4.878260000  | 5.247029000  |
| H                     | 11.150526000 | 5.082891000  | 5.345801000  |
| C                     | 8.310469000  | 9.117568000  | 6.939427000  |
| C                     | 12.092223000 | 4.876136000  | 9.949270000  |
| C                     | 14.838261000 | 8.688296000  | 4.887881000  |
| H                     | 13.783369000 | 8.840420000  | 4.686854000  |
| C                     | 14.923353000 | 4.431961000  | 5.078165000  |
| C                     | 15.001034000 | 8.636286000  | 10.275147000 |
| H                     | 14.688312000 | 9.669176000  | 10.384728000 |
| C                     | 17.098812000 | 8.389422000  | 4.076304000  |
| H                     | 17.801012000 | 8.318142000  | 3.250270000  |
| C                     | 14.358321000 | 13.339467000 | 8.684111000  |



|   |              |              |              |
|---|--------------|--------------|--------------|
| H | 14.411234000 | 14.392795000 | 8.944406000  |
| C | 17.552670000 | 8.281623000  | 5.393071000  |
| H | 18.609164000 | 8.128937000  | 5.596086000  |
| C | 9.796855000  | 7.451114000  | 3.923223000  |
| H | 10.677036000 | 8.057618000  | 4.106932000  |
| C | 14.153718000 | 4.451690000  | 3.904751000  |
| H | 14.630946000 | 4.294268000  | 2.942339000  |
| C | 8.899590000  | 5.000917000  | 7.575947000  |
| H | 9.426789000  | 4.683560000  | 6.681708000  |
| C | 13.287327000 | 12.560421000 | 9.127119000  |
| H | 12.503054000 | 13.006480000 | 9.732781000  |
| C | 15.305651000 | 6.653626000  | 8.924458000  |
| H | 15.226124000 | 6.122308000  | 7.980256000  |
| C | 15.740471000 | 8.595314000  | 3.827168000  |
| H | 15.380473000 | 8.684723000  | 2.805957000  |
| C | 15.861709000 | 5.996427000  | 10.022463000 |
| H | 16.203886000 | 4.970637000  | 9.913331000  |
| C | 7.860904000  | 6.259044000  | 4.748185000  |
| H | 7.221930000  | 5.941539000  | 5.565972000  |
| C | 13.212010000 | 11.211006000 | 8.780727000  |
| H | 12.369070000 | 10.613182000 | 9.114576000  |
| C | 8.419133000  | 4.031899000  | 8.456318000  |
| H | 8.586258000  | 2.979660000  | 8.241789000  |
| C | 15.985719000 | 6.650620000  | 11.250791000 |
| H | 16.423070000 | 6.137336000  | 12.102713000 |
| C | 9.472664000  | 7.071717000  | 2.619232000  |
| H | 10.098711000 | 7.398116000  | 1.793292000  |
| C | 12.835258000 | 2.207053000  | 10.073178000 |
| H | 13.090158000 | 1.154054000  | 10.116718000 |
| C | 10.087713000 | 6.752891000  | 13.514627000 |
| C | 15.355982000 | 12.760788000 | 7.898756000  |
| H | 16.188819000 | 13.361940000 | 7.544937000  |
| C | 10.946673000 | 8.922001000  | 12.052396000 |
| H | 11.285069000 | 9.742980000  | 11.433022000 |
| C | 12.070397000 | 4.207590000  | 11.190107000 |
| H | 11.713206000 | 4.754410000  | 12.048889000 |
| C | 7.963663000  | 6.735133000  | 8.969830000  |
| H | 7.764428000  | 7.781437000  | 9.175301000  |
| C | 15.553498000 | 7.971081000  | 11.372663000 |
| H | 15.655660000 | 8.494454000  | 12.319440000 |
| C | 7.543999000  | 5.874548000  | 3.444168000  |
| H | 6.665155000  | 5.261921000  | 3.263570000  |
| C | 6.687357000  | 11.366373000 | 7.391076000  |
| H | 6.061738000  | 12.237890000 | 7.561719000  |
| C | 8.348612000  | 6.279651000  | 2.377050000  |
| H | 8.098364000  | 5.982192000  | 1.362589000  |
| C | 12.458053000 | 2.893853000  | 11.251458000 |
| H | 12.449640000 | 2.365777000  | 12.199554000 |
| C | 7.203412000  | 9.373441000  | 6.116191000  |

|   |              |              |              |
|---|--------------|--------------|--------------|
| H | 6.966659000  | 8.708732000  | 5.292523000  |
| C | 10.070890000 | 8.028140000  | 14.099475000 |
| H | 9.716240000  | 8.152879000  | 15.118099000 |
| C | 7.713936000  | 4.410419000  | 9.601304000  |
| H | 7.335706000  | 3.655030000  | 10.284254000 |
| C | 7.488649000  | 5.763228000  | 9.853650000  |
| H | 6.931666000  | 6.069060000  | 10.734789000 |
| C | 10.515455000 | 9.121433000  | 13.360685000 |
| H | 10.518560000 | 10.116519000 | 13.796154000 |
| C | 6.400423000  | 10.493070000 | 6.341192000  |
| H | 5.551121000  | 10.682342000 | 5.690772000  |
| H | 12.167898000 | 7.679517000  | 5.723589000  |
| C | 13.207367000 | 2.072083000  | 7.598185000  |
| H | 14.163613000 | 2.394882000  | 7.178665000  |
| H | 13.267319000 | 1.007654000  | 7.835687000  |
| H | 12.446283000 | 2.207162000  | 6.822309000  |
| C | 16.418118000 | 4.242974000  | 5.040832000  |
| H | 16.752229000 | 3.642984000  | 5.892264000  |
| H | 16.740653000 | 3.759737000  | 4.113953000  |
| H | 16.921340000 | 5.215931000  | 5.106462000  |
| C | 9.640262000  | 5.530219000  | 14.276858000 |
| H | 8.965640000  | 5.791495000  | 15.097233000 |
| H | 9.133082000  | 4.829058000  | 13.608235000 |
| H | 10.502299000 | 5.008171000  | 14.713082000 |

**Table S23c** Optimised cartesian coordinates of N(imidazopyridine)/O(piconyl) binding mode of [3]ClO<sub>4</sub> using (UB3LYP/LanL2DZ/6-31G\*).

| Cartesian Coordinates |              |              |              |
|-----------------------|--------------|--------------|--------------|
| Ru                    | 11.405047000 | 8.839617000  | 6.907574000  |
| Br                    | 12.445510000 | 2.439221000  | 6.871447000  |
| Br                    | 10.336235000 | 5.937152000  | 14.560737000 |
| Br                    | 16.489304000 | 4.456404000  | 5.086515000  |
| P                     | 13.724835000 | 9.485975000  | 7.342171000  |
| P                     | 9.078229000  | 8.275828000  | 6.381772000  |
| O                     | 10.881629000 | 9.055320000  | 9.097822000  |
| O                     | 10.973292000 | 11.509932000 | 5.553257000  |
| N                     | 11.701359000 | 6.892630000  | 7.869397000  |
| N                     | 14.019810000 | 5.145891000  | 6.132352000  |
| N                     | 12.076961000 | 4.792420000  | 8.462046000  |
| N                     | 10.644452000 | 7.239583000  | 12.134909000 |
| C                     | 12.717269000 | 5.485824000  | 6.088526000  |
| C                     | 14.931398000 | 9.248096000  | 5.969316000  |
| C                     | 12.104738000 | 5.721385000  | 7.420408000  |
| C                     | 13.865701000 | 11.281732000 | 7.756552000  |
| C                     | 10.993521000 | 8.050513000  | 9.843336000  |
| C                     | 10.665244000 | 8.279212000  | 11.286646000 |
| C                     | 11.424717000 | 6.803594000  | 9.225806000  |
| C                     | 14.937601000 | 12.070777000 | 7.313806000  |
| H                     | 15.717534000 | 11.637275000 | 6.697144000  |
| C                     | 11.132137000 | 10.502580000 | 6.102671000  |
| C                     | 16.295792000 | 9.015228000  | 6.211993000  |
| H                     | 16.659593000 | 8.911836000  | 7.228900000  |
| C                     | 8.365544000  | 6.949974000  | 7.459249000  |
| C                     | 14.500276000 | 8.639654000  | 8.793016000  |
| C                     | 8.203893000  | 10.605701000 | 7.682365000  |
| H                     | 9.074804000  | 10.454956000 | 8.313014000  |
| C                     | 7.356538000  | 11.689229000 | 7.917667000  |
| H                     | 7.573045000  | 12.375881000 | 8.731515000  |
| C                     | 8.712458000  | 7.706226000  | 4.664606000  |
| C                     | 12.286104000 | 3.420606000  | 8.474107000  |
| C                     | 12.699626000 | 5.422643000  | 3.697158000  |
| H                     | 12.184683000 | 5.531607000  | 2.747356000  |
| C                     | 12.016065000 | 5.645696000  | 4.894980000  |
| H                     | 10.974732000 | 5.940042000  | 4.892494000  |
| C                     | 7.937717000  | 9.707904000  | 6.633781000  |
| C                     | 11.679855000 | 5.472629000  | 9.635399000  |
| C                     | 14.492363000 | 9.385508000  | 4.642887000  |
| H                     | 13.442214000 | 9.565884000  | 4.440270000  |
| C                     | 14.644010000 | 4.943659000  | 4.987823000  |
| C                     | 14.607188000 | 9.275125000  | 10.039852000 |
| H                     | 14.292327000 | 10.306758000 | 10.155712000 |

|   |              |              |              |
|---|--------------|--------------|--------------|
| C | 16.748274000 | 9.049803000  | 3.834238000  |
| H | 17.450579000 | 8.971008000  | 3.009177000  |
| C | 14.013001000 | 14.002228000 | 8.444745000  |
| H | 14.068184000 | 15.055268000 | 8.705584000  |
| C | 17.195355000 | 8.911826000  | 5.149477000  |
| H | 18.245973000 | 8.725010000  | 5.352536000  |
| C | 9.510104000  | 8.172170000  | 3.606606000  |
| H | 10.360910000 | 8.810877000  | 3.818379000  |
| C | 14.041579000 | 5.058102000  | 3.729918000  |
| H | 14.608791000 | 4.871183000  | 2.826118000  |
| C | 8.632714000  | 5.595264000  | 7.191609000  |
| H | 9.178666000  | 5.311916000  | 6.296863000  |
| C | 12.943434000 | 13.224012000 | 8.892710000  |
| H | 12.163205000 | 13.670707000 | 9.503102000  |
| C | 14.940666000 | 7.309337000  | 8.672188000  |
| H | 14.886143000 | 6.790293000  | 7.720358000  |
| C | 15.396053000 | 9.291089000  | 3.584043000  |
| H | 15.041884000 | 9.405477000  | 2.563235000  |
| C | 15.477872000 | 6.638826000  | 9.771322000  |
| H | 15.826627000 | 5.616524000  | 9.652779000  |
| C | 7.613597000  | 6.879130000  | 4.370584000  |
| H | 6.977438000  | 6.512714000  | 5.169807000  |
| C | 12.865205000 | 11.875011000 | 8.545774000  |
| H | 12.024405000 | 11.277464000 | 8.885824000  |
| C | 8.173441000  | 4.594989000  | 8.048591000  |
| H | 8.374414000  | 3.552917000  | 7.814744000  |
| C | 15.576996000 | 7.278565000  | 11.009557000 |
| H | 15.999845000 | 6.756188000  | 11.863172000 |
| C | 9.218317000  | 7.817680000  | 2.288108000  |
| H | 9.840503000  | 8.193248000  | 1.480410000  |
| C | 12.265966000 | 2.744757000  | 9.662548000  |
| H | 12.435986000 | 1.675449000  | 9.653701000  |
| C | 10.344483000 | 7.459740000  | 13.398781000 |
| C | 15.006586000 | 13.423129000 | 7.654529000  |
| H | 15.838669000 | 14.023518000 | 7.297821000  |
| C | 10.376488000 | 9.583162000  | 11.710304000 |
| H | 10.403129000 | 10.398401000 | 10.999583000 |
| C | 11.647041000 | 4.758846000  | 10.850821000 |
| H | 11.351940000 | 5.291288000  | 11.741044000 |
| C | 7.631115000  | 7.273340000  | 8.610723000  |
| H | 7.398400000  | 8.309580000  | 8.832852000  |
| C | 15.140562000 | 8.597088000  | 11.139111000 |
| H | 15.225706000 | 9.109407000  | 12.093585000 |
| C | 7.329225000  | 6.520529000  | 3.051743000  |
| H | 6.478410000  | 5.878612000  | 2.841458000  |
| C | 6.243144000  | 11.899881000 | 7.102188000  |
| H | 5.590184000  | 12.749774000 | 7.278975000  |
| C | 8.130516000  | 6.988167000  | 2.008112000  |
| H | 7.905748000  | 6.710252000  | 0.982271000  |

|   |              |              |              |
|---|--------------|--------------|--------------|
| C | 11.971322000 | 3.425430000  | 10.866479000 |
| H | 11.960370000 | 2.873859000  | 11.800650000 |
| C | 6.815891000  | 9.927501000  | 5.819813000  |
| H | 6.595920000  | 9.256972000  | 4.996254000  |
| C | 10.039590000 | 8.716068000  | 13.931171000 |
| H | 9.800758000  | 8.832417000  | 14.981444000 |
| C | 7.446258000  | 4.929681000  | 9.193743000  |
| H | 7.084728000  | 4.150426000  | 9.858520000  |
| C | 7.176392000  | 6.270074000  | 9.470033000  |
| H | 6.599880000  | 6.539923000  | 10.350487000 |
| C | 10.061580000 | 9.795484000  | 13.052058000 |
| H | 9.835309000  | 10.794674000 | 13.412128000 |
| C | 5.977091000  | 11.018483000 | 6.053383000  |
| H | 5.116564000  | 11.179768000 | 5.410328000  |
| H | 11.848846000 | 8.365538000  | 5.459485000  |

**Table S24d** Optimised cartesian coordinates of N,O piconyl binding mode of [3]ClO<sub>4</sub> using (UB3LYP/LanL2DZ/6-31G\*).

Cartesian Coordinates

|    |              |              |             |
|----|--------------|--------------|-------------|
| Ru | 11.070446000 | 1.522723000  | 5.350713000 |
| P  | 10.759270000 | 1.030759000  | 2.974752000 |
| P  | 11.513744000 | 1.722388000  | 7.749965000 |
| O  | 9.809907000  | 3.377744000  | 5.244281000 |
| N  | 12.448421000 | 3.267919000  | 4.907130000 |
| O  | 9.088173000  | -0.651610000 | 6.008799000 |
| N  | 7.776478000  | 7.058309000  | 5.175942000 |
| C  | 11.849778000 | 4.502203000  | 4.858400000 |
| N  | 10.001225000 | 6.970316000  | 4.983508000 |
| C  | 10.363543000 | 4.488813000  | 5.074241000 |
| C  | 10.772726000 | -0.764890000 | 2.540110000 |
| C  | 8.134407000  | 5.697194000  | 5.185157000 |
| C  | 13.091728000 | 2.565744000  | 8.219900000 |
| C  | 11.606094000 | 0.094604000  | 8.622758000 |
| C  | 9.857584000  | 0.178052000  | 5.751399000 |
| C  | 10.227274000 | 2.654898000  | 8.693717000 |
| C  | 13.765526000 | 3.213454000  | 4.697058000 |
| C  | 8.894986000  | 2.598842000  | 8.254869000 |
| H  | 8.649161000  | 2.054405000  | 7.349868000 |
| C  | 13.198428000 | 3.963446000  | 8.107689000 |
| H  | 12.339806000 | 4.553947000  | 7.801390000 |
| C  | 12.020115000 | 1.764926000  | 1.841916000 |
| C  | 7.136629000  | 4.707760000  | 5.248771000 |
| H  | 7.442038000  | 3.672234000  | 5.209477000 |
| C  | 11.516162000 | -1.673131000 | 3.309366000 |
| H  | 12.051068000 | -1.321400000 | 4.184848000 |
| C  | 9.545616000  | 5.683200000  | 5.085304000 |
| C  | 10.076985000 | -1.238832000 | 1.414843000 |
| H  | 9.491212000  | -0.556961000 | 0.807228000 |
| C  | 11.566243000 | -3.023850000 | 2.959324000 |
| H  | 12.144433000 | -3.715152000 | 3.566048000 |
| C  | 9.140538000  | 1.609915000  | 2.287119000 |
| C  | 10.868928000 | -3.485506000 | 1.842446000 |
| H  | 10.901524000 | -4.537939000 | 1.575221000 |
| C  | 6.729390000  | 1.787145000  | 2.568303000 |
| H  | 5.845069000  | 1.628913000  | 3.179908000 |
| C  | 14.560973000 | 4.335968000  | 4.433079000 |
| H  | 15.624316000 | 4.211422000  | 4.272268000 |
| C  | 13.009273000 | 0.972076000  | 1.242069000 |
| H  | 13.018495000 | -0.100505000 | 1.404075000 |
| C  | 12.228357000 | -0.995727000 | 7.991942000 |
| H  | 12.616090000 | -0.884146000 | 6.984699000 |
| C  | 12.576044000 | 5.664099000  | 4.598050000 |

|   |              |              |              |
|---|--------------|--------------|--------------|
| H | 12.055331000 | 6.611191000  | 4.570329000  |
| C | 6.607975000  | 2.329680000  | 1.287039000  |
| H | 5.631068000  | 2.604650000  | 0.899552000  |
| N | 8.302867000  | 9.711224000  | 3.751646000  |
| C | 10.124336000 | -2.589811000 | 1.071899000  |
| H | 9.575938000  | -2.942310000 | 0.202913000  |
| C | 7.984227000  | 1.437399000  | 3.067119000  |
| H | 8.058585000  | 1.013403000  | 4.062735000  |
| C | 9.005028000  | 2.144931000  | 0.995819000  |
| H | 9.876777000  | 2.276289000  | 0.364156000  |
| C | 10.521435000 | 3.364210000  | 9.871094000  |
| H | 11.542384000 | 3.415929000  | 10.234662000 |
| C | 13.951650000 | 5.577643000  | 4.383690000  |
| H | 14.535282000 | 6.469940000  | 4.178790000  |
| C | 14.212344000 | 1.837466000  | 8.644536000  |
| H | 14.153439000 | 0.759319000  | 8.747588000  |
| C | 12.033011000 | 3.151796000  | 1.609540000  |
| H | 11.267857000 | 3.784965000  | 2.049557000  |
| C | 14.392652000 | 4.612752000  | 8.419307000  |
| H | 14.452712000 | 5.694989000  | 8.340810000  |
| C | 7.881976000  | 3.233533000  | 8.974756000  |
| H | 6.855163000  | 3.175357000  | 8.624508000  |
| C | 12.346140000 | -2.222096000 | 8.647008000  |
| H | 12.831902000 | -3.054769000 | 8.145949000  |
| C | 7.748570000  | 2.508003000  | 0.504127000  |
| H | 7.664636000  | 2.921636000  | -0.496970000 |
| C | 11.094606000 | -0.075637000 | 9.919152000  |
| H | 10.603553000 | 0.747275000  | 10.426760000 |
| C | 9.507221000  | 4.004180000  | 10.585642000 |
| H | 9.751307000  | 4.547608000  | 11.494190000 |
| C | 15.503313000 | 3.876985000  | 8.840538000  |
| H | 16.432357000 | 4.383165000  | 9.087059000  |
| C | 13.984397000 | 1.551135000  | 0.426566000  |
| H | 14.739844000 | 0.920929000  | -0.034142000 |
| C | 8.972852000  | 7.783493000  | 5.013126000  |
| C | 11.831154000 | -2.382016000 | 9.934620000  |
| H | 11.913750000 | -3.339756000 | 10.440510000 |
| C | 6.461743000  | 7.430964000  | 5.403621000  |
| C | 11.204182000 | -1.307314000 | 10.566537000 |
| H | 10.796160000 | -1.424767000 | 11.566469000 |
| C | 15.408697000 | 2.489805000  | 8.951540000  |
| H | 16.263994000 | 1.909293000  | 9.285603000  |
| C | 13.003224000 | 3.726566000  | 0.788944000  |
| H | 12.988306000 | 4.797810000  | 0.607116000  |
| C | 5.820870000  | 5.095074000  | 5.342802000  |
| H | 5.028143000  | 4.354853000  | 5.375141000  |
| C | 9.109633000  | 9.222809000  | 4.711337000  |
| C | 13.983930000 | 2.926839000  | 0.196099000  |
| H | 14.737924000 | 3.373636000  | -0.445770000 |

|    |              |              |              |
|----|--------------|--------------|--------------|
| C  | 8.185680000  | 3.940197000  | 10.139737000 |
| H  | 7.397148000  | 4.435399000  | 10.699479000 |
| C  | 8.468930000  | 10.969845000 | 3.394792000  |
| C  | 5.489027000  | 6.466680000  | 5.454983000  |
| H  | 4.465682000  | 6.776335000  | 5.626191000  |
| C  | 10.110910000 | 9.980332000  | 5.323856000  |
| H  | 10.738732000 | 9.540011000  | 6.090138000  |
| C  | 9.432189000  | 11.828152000 | 3.937487000  |
| H  | 9.515051000  | 12.853174000 | 3.597198000  |
| C  | 10.267300000 | 11.308308000 | 4.922532000  |
| H  | 11.028246000 | 11.935498000 | 5.377572000  |
| H  | 12.169973000 | 0.382947000  | 5.360005000  |
| Br | 6.011160000  | 9.212252000  | 5.808360000  |
| Br | 7.299824000  | 11.643171000 | 2.038955000  |
| Br | 14.675440000 | 1.549437000  | 4.738952000  |



## References

- 1 N. Ahmad, J. J. Levison, S. D. Robinson, M. P. Uttley, E. R. Wonchoba and G. W. Parshall, *Inorg. Synth.*, 2007, **15**, 45-64.
- 2 (a) N. Kundu, K. Bhattacharya, T. M. S. Abtab and M. Chaudhury, *Tetrahedron Lett.*, 2012, **53**, 2719-2721; (b) N. Kundu, T. M. S. Abtab, S. Kundu, A. Endo and S. J. Chaudhury, *Inorg. Chem.*, 2012, **51**, 2652-2661; (c) N. Kundu, M. Maity, P. B. Chatterjee, J. S. Teat, A. Endo and M. Chaudhury, *J. Am. Chem. Soc.*, 2011, **133**, 20104-20107.
- 3 (a) G. M. Sheldrick, *Acta Crystallogr. Sect. A*. 2008, **A64**, 112-122; (b) *Program for Crystal Structure Solution and Refinement; University of Göttingen: Göttingen, Germany*, 1997; (c) G. M. Sheldrick, *Acta Crystallogr. Sect. C: Struct. Chem.*, 2015, **C71**, 3-8.
- 4 C. Lee, W. Yang and R. G. Parr, *Phys. Rev., B* 1988, **37**, 785-789.
- 5 (a) D. Andrae, U. Haeussermann, M. Dolg, H. Stoll and H. Preuss, *Theor. Chim. Acta.*, 1990, **77**, 123-141; (b) P. Fuentealba, H. Preuss, H. Stoll and L. von Szentpaly, *Chem. Phys. Lett.*, 1989, **89**, 418-422.
- 6 (a) R. Bauernschmitt and R. Ahlrichs, *Chem. Phys. Lett.*, 1996, **256**, 454-464; (b) R. E. Stratmann, G. E. Scuseria and M. J. Frisch, *J. Chem. Phys.*, 1998, **109**, 8218-8225; (c) M. E. Casida, C. Jamorski, K. C. Casida and D. R. Salahub, *J. Chem. Phys.*, 1998, **108**, 4439-4450.
- 7 (a) V. Barone and M. Cossi, *J. Phys. Chem., A* 1998, **102**, 1995-2001; (b) M. Cossi and V. Barone, *J. Chem. Phys.*, 2001, **115**, 4708-4718; (c) M. Cossi, N. Rega, G. Scalmani and V. Barone, *J. Comput. Chem.*, 2003, **24**, 669-681.
- 8 S. I. Gorelsky, *SWizard program*, <http://www.sg-chem.net/>.
- 9 S. Leonid, *Chemissian 1.7*, **2005-2010**. Available at <http://www.chemissian.com>.
- 10 D. A. Zhurko and G. A. Zhurko, *ChemCraft 1.5*, Plimus, San Diego, CA. Available at <http://www.chemcraftprog.com>.

- 11 E. B. Hemminga, B. Chanb, C. P. Turner, A. L. Corcilius, J. R. Pricec, D. M. G. Gardiner, A. A. F. Masters and T Maschmeyer, *Appl. Catal. B: Environ.*, 2018, **223**, 234-241.
- 12 J. M. Dressel, E. N. Cook, S. L. Hooe, J. J. Moreno, D. A. Dickie and C. W. Machan, *Inorg. Chem. Front.*, 2023, **10**, 972-978.
- 13 A. Z. Haddad, S. P. Cronin, M. S. Mashuta, R. M. Buchanan and C. A. Grapperhaus, *Inorg. Chem.*, 2017, **18**, 11254-11265.
- 14 A. Barma, M. Chakraborty, S. K. Bhattacharya P. Ghosh and P. Roy, *Mater. Adv.*, 2022, **3**, 7655-7666.
- 15 P. A. Jacques, V. Artero, J. P. Cautb and M. Fontecavea, *PNAS*. 2009, **49**, 20627-20632.
- 16 Z. Niu, L. Yang. Y. Xiao, M. Xue1, J. Zhou, L. Zhang, J. Zhang, D. P. Wilkinson and C. Ni, *Electrocatalysis*, 2022, **13**, 230-241.
- 17 A. Das, Z. Han, W. W. Brennessel, P. L. Holland and R. Eisenberg. *ACS Catal.*, 2015, **5**, 1397-1406.
- 18 S. Chandra, A. S. Hazari, Q. Song, D. Hunger, N. I. Neuman, J. V. Slageren, E. Klemm and B. Sarkar, *ChemSusChem*. 2023, **16**, e202201146.
- 19 M. Papadakis, A. Barrozo, T. Straistari, N. Queyriaux, A. Putri, J. Fize, M. Giorgi, M. Réglier, J. Massin, R. Hardré and M. Orio, *Dalton Trans.*, 2020, **16**, 5064-5073.
- 20 M. L. Helm, M. P. Stewart, R. M. Bullock, M. R. Dubois and D. L. Dubois, *Science*, 2011, **333**, 863-866.
- 21 M. Bellini, J. Böskén, M. Wörle, D. Thöny, J. J. Gamboa-Carballo, F. Krumeich, F. Bàrtoli H. A. Miller, L. Poggini, W. Oberhauser, A. Lavacch, H. Grützmacher and F. Vizza, *Chem. Sci.*, 2022, **13**, 3748-3760.
- 22 C. K. Williams, G. A. McCarver, A. Chaturvedi, S. Sinha, M. Ang, K. D Vogiatzis, and J. J. Jiang, *Chem. Eur. J.*, 2022, **28**, p.e202201323.
- 23 L. Trowbridge, B. Averkiev, and P. E. Sues, *Chem. Eur. J.*, 2022, **28**, p.e202301920.
